# Supplementary material
Source: PubMed Central journal article supplement (PMC3832197)
Supplement: NIHMS522539-supplement-Supp_Fig_S1-S11___Table_S1-S10.pdf [file NIHMS522539-supplement-Supp_Fig_S1-S11___Table_S1-S10.pdf]

## Supporting data

**Figure S1.** (A) AveHAS plots and (B) phylogenetic tree for 135 LCT family proteins included in this study. The tree was generated using the ClustalX multiple alignment and the FigTree program. Protein abbreviations and their descriptions are listed in Table S1 in a clockwise fashion starting from cluster 1. (C) Homology between members of the Sweet and LCT families. GSAT alignment of TMSs 3-7 of LCT Bba2 (*Beauveria bassiana*; gi400602576; 7 TMSs) with TMSs 3-7 of Sweet Aae2 (*Aedes aegypti*; gi157109690; 7 TMSs). A comparison score of 12.4 S.D. was obtained with 43.7% similarity and 27.2% identity. Another alignment (not shown) gave 13.6 S.D. and had 2 TMSs aligned. (D) Homology between members of the PNaS and LCT families. GSAT alignment of TMSs 2-4 of LCT Ago1 (*Ashbya gossypii*; gi302308260; 7 TMSs) and TMSs 6-8 of PNaS Cre1 (*Caenorhabditis remanei*; gi308511717; 11 TMSs). A comparison score of 12.8 S.D. was obtained with 48.1% similarity and 30.8% identity.

**Figure S2.** (A) AveHAS plots and (B) phylogenetic tree for 104 MR family proteins included in this study. Protein abbreviations and their descriptions are listed in Table S2 in a clockwise fashion starting from cluster 1.

**Figure S3.** (A) AveHAS plots and (B) phylogenetic tree for 134 NiCoT family proteins included in this study. Protein abbreviations and their descriptions are listed in Table S3 in a clockwise fashion starting from cluster 1. (C) Homology between members of the TSUP and NiCoT families. GSAT alignment of TMSs 4-6 of NiCoT Bja1 (*Bradyrhizobium japonicum*; gi27376265; 6 TMSs) with TMSs 1-3 of TSUP Pla1 (*Parvibaculum lavamentivorans*; gi

154252649; 8 TMSs). A comparison score of 12.8 S.D. was obtained with 44.7% similarity and 36.4% identity.

**Figure S4.** (A) AveHAS plots and (B) phylogenetic tree for 52 OST family proteins included in this study. Protein abbreviations and their descriptions are listed in Table S4 in a clockwise fashion starting from cluster 1. (C) Homology between members of the TSUP and OST families. GSAT alignment of TMSs 2-3 of TSUP Tsp1 (*Thermococcus sp. AM4*; gi254172062; 8 TMSs) with TMSs 1-2 of OST Cre2 (*Chlamydomonas reinhardtii*; gi159465163; 7 TMSs). A comparison score of 12.1 S.D. was obtained with 50.8% similarity and 33.9% identity. (D) Binary alignment of members of the TSUP and OST families with 4 TMSs aligned, further supporting (C). GSAT alignment of TMSs 2-5 of TSUP Gfo1 (*Gramella forsetii*; gi120434413; 7 TMSs) and TMSs 2-5 of OST Dre1 (*Danio rerio*; gi169146805; 7 TMSs). The last two predicted TMSs show displacement, possibly a result of the prediction program used. A comparison score of 11.3 S.D. was obtained with 47.0% similarity and 26.2% identity.

**Figure S5.** (A) AveHAS plots and (B) phylogenetic tree for 198 Sweet family proteins included in this study. Protein abbreviations and their descriptions are listed in Table S5 in a clockwise fashion starting from cluster 1. (C) Homology between members of the Sweet and OST families. GSAT alignment of TMSs 6-7 of Sweet Rco4 (*Ricinus communis*; gi255540127; 7 TMSs) with TMSs 6-7 of OST Ath8 (*Arabidopsis thaliana*; gi18411404; 7 TMSs). A comparison score of 12.3 S.D. was obtained with 44.3% similarity and 22.1% identity. (D) Binary alignment of members of the Sweet and OST families with 3 TMSs aligned, further supporting (C). GSAT alignment of TMSs 4-6 of Sweet Asu3 (*Ascaris suum*; gi324518669; 7 TMSs) and TMSs 4-6 of

OST Ncr1 (*Neurospora crassa*; gi85106985; 7 TMSs). A comparison score of 10.3 S.D. was obtained with 49.1% similarity and 28.7% identity.

**Figure S6.** (A) AveHAS plots and (B) phylogenetic tree for 147 PNaS family proteins included in this study. Protein abbreviations and their descriptions are listed in Table S6 in a clockwise fashion starting from cluster 1. (C) Homology between members of the Sweet and PNaS families. GSAT alignment of TMSs 4-6 of PNaS Odi8 (*Oikopleura dioica*; gi313242874; 8 TMSs) with TMSs 3-5 of MR Hwa1 (*Haloquadratum walsbyi DSM 16790*; gi110668951; 7 TMSs). A comparison score of 13.1 S.D. was obtained with 57.3% similarity and 40.0% identity.

**Figure S7.** (A) AveHAS plots and (B) phylogenetic tree for 74 PnuC family proteins included in this study. Protein abbreviations and their descriptions are listed in Table S7 in a clockwise fashion starting from cluster 1. (C) Homology between members of the PnuC and TSUP families. GSAT alignment of TMSs 2-3 of PnuC Spr1 (*Serinicoccus profundus*; gi379058816; 7 TMSs) with TMSs 3-4 of TSUP Cba4 (*Clostridiales bacterium I\_7\_47FAA*; gi239625513; 8 TMSs). A comparison score of 12.4 S.D. was obtained with 49.3% similarity and 29.9% identity. (D) Binary alignment of members of the PnuC and TSUP families with 3 TMSs aligned, further supporting (C). GSAT alignment of TMSs 3-5 of PnuC Sde2 (*Sulfurospirillum delevignum*; gi268679606; 7 TMSs) with TMSs 4-6 of TSUP Ere1 (*Eubacterium rectale*; gi238924940; 8 TMSs). A comparison score of 11.1 S.D. was obtained with 54.4% similarity and 25.2% identity.

**Figure S8.** (A) AveHAS plots and (B) phylogenetic tree for the 41 GPCR family proteins (see Table S8A) included in this study. Due to the high similarity of homologues generated with the

Protocol 1 program, selected proteins obtained using this protocol with Dre4 as the query sequence are presented in Table S8B and not included in this tree; they all belong to the Dre4 branch (cluster 10 of the tree). Additional proteins used to produce the phylogenetic tree **(B)** were compiled from a diverse group of functional types obtained from the GPCRDB (<http://www.gpcr.org/7tm/>). **(C)** Homology between members of the GPCR and the microbial rhodopsin (MR) families. GSAT alignment of TMSs 5-6 of MR Mos1 (*Mixia osmundae*; gi358059197; 7 TMSs) with TMSs 5-6 of GPCR Dre1 (*Danio rerio*; gi292621989; 7 TMSs). A comparison score of 13.1 S.D. was obtained with 44.9% similarity and 32.1% identity. **(D)** Binary alignment of members of the GPCR and MR families with 4 TMSs aligned, further supporting **(C)**. GSAT alignment of TMSs 1-4 of GPCR Dre5 (*Danio rerio*; gi122064639; 7TMSs) with TMSs 1-4 of MR Cga1 (*Cryptococcus gattii*; gi321261457; 7 TMSs). A comparison score of 10.6 S.D. was obtained with 38.8% similarity and 27.9% identity. AveHAS plots and the phylogenetic tree for the 56 GPCR proteins (Table S8B) that were used in finding the comparisons shown in **(C)** and **(D)** are presented in **(E)** and **(F)**, respectively. GPCR protein abbreviations and their descriptions are listed in Tables S8A and B in a clockwise fashion starting from clusters 1 of **(B)** and **(F)**, respectively.

**Figure S9.** **(A)** Schematic representation of the mean bit score of a given alignment. **(B)** Algorithm input into Mathematica 7.0 (Wolfram Research, Inc., Champaign, IL, USA) to determine probabilities of a given  $Z$  score of an alignment. **(C)** Probability of notable  $Z$  scores, as determined by Mathematica 7.0.

**Figure S10.** AveHAS plots representing all families within the TOG superfamily. The plots are similar to the plots presented in Figure 2, but due to the large N- and C-terminal extensions present in some GPCR homologues, this plot is not easy to interpret.

**Figure S11.** Results from the ClustalX-based neighbor-joining program, showing the TOG superfamily proteins. These proteins correspond to those shown in the SFT-derived tree shown in Fig. 3A.

**Video S1.** Video file of rotation of the superimposition of B-rho and M-rho.

# A

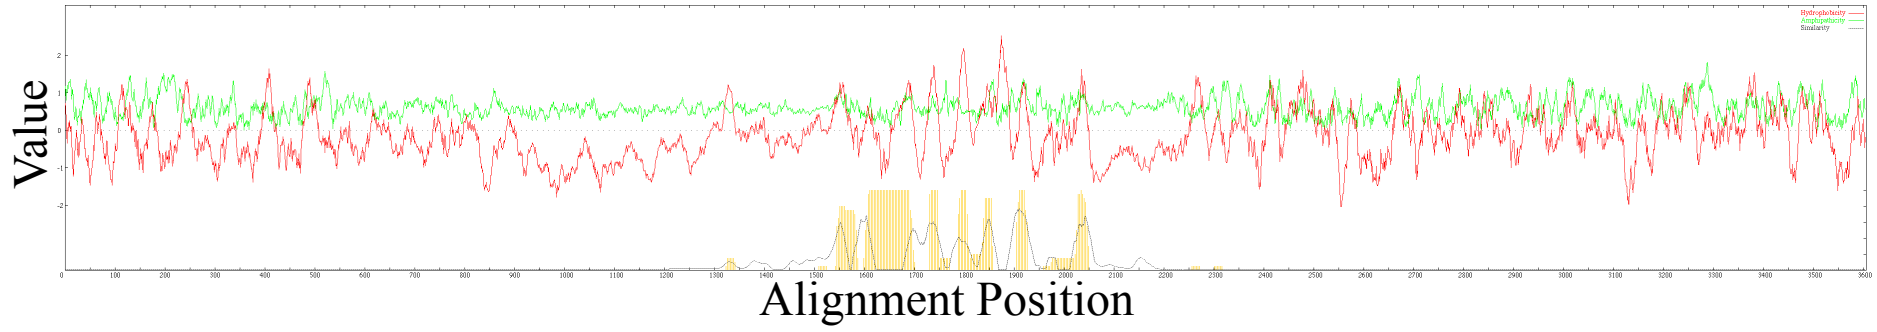

Figure S1

**B**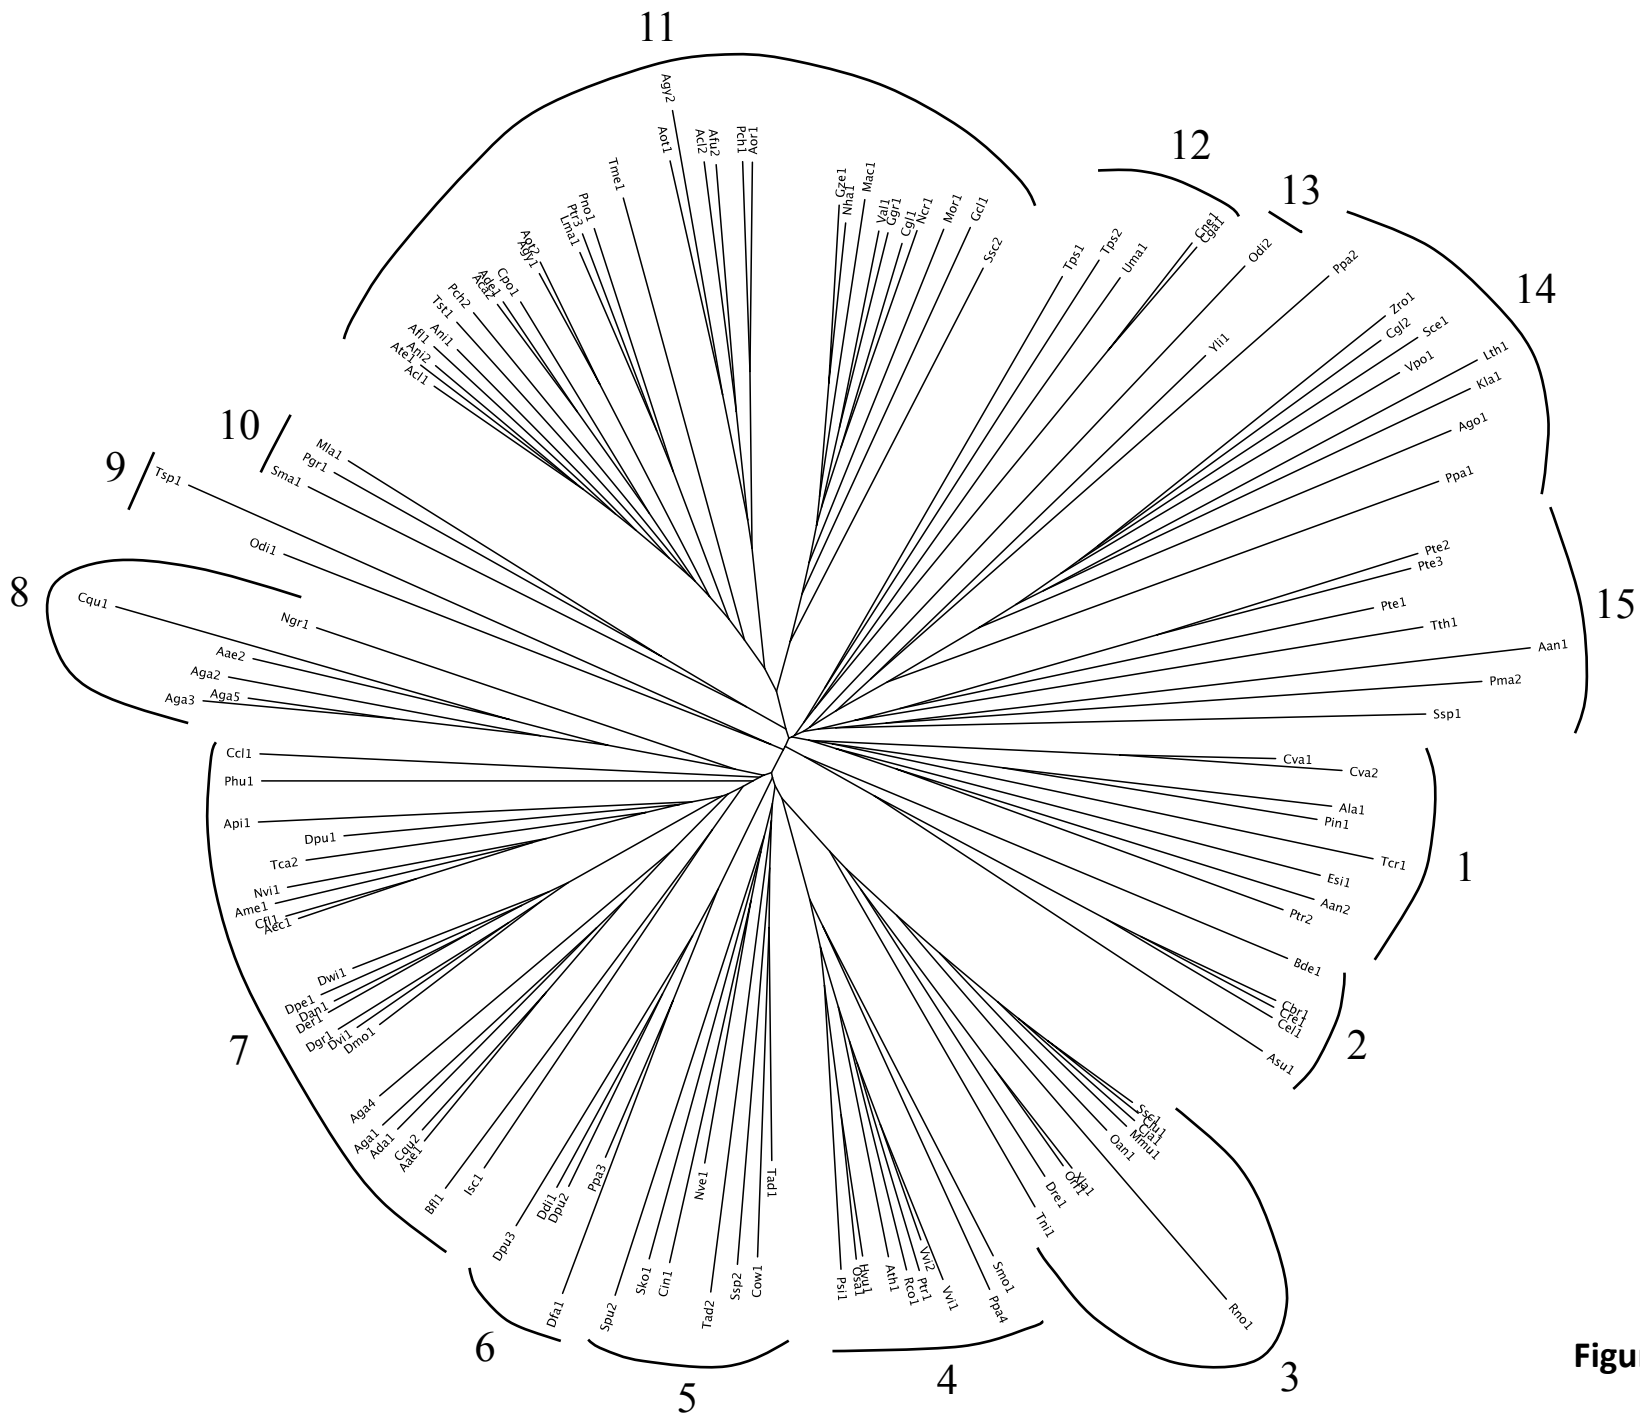**Figure S1**

C

Aae2 68 <sup>2</sup> MNDPAMIRANVVGFAI-SVVYSVFF <sup>3</sup> ---- YLYT <sup>4</sup> PROSKGDFWKQLGIAGA 112  
| | : | | | : | | : | | | :  
Bba2 83 MVQPNDVA <sup>3</sup> YTLHGLAISSTIYSOFYPR <sup>4</sup> LWCSMTFWAC 132

Aae2 113 <sup>4</sup> ITAAIVG-YAKIEN <sup>5</sup> NPEVVEDRFGLIITVLM--LMLIAOPLFGL PEI ---I 156  
| | | : : | | : : | : | : : | | : :  
Bba2 133 <sup>4</sup> ILAALLGTVAAS <sup>5</sup> AFPDSQSWMWLDVVYLVGNFKTLLTLLK YLPQVWLNY 181

Aae2 157 RKKSTEG--- <sup>6</sup> LPFAMILSGTVVGCWLLYGIILN <sup>7</sup> NNTFVILQNLAAVSLSG 203  
| : | | : | | | : : | : : | | : : : | | : | |  
Bba2 182 RRKSTQGL <sup>6</sup> PPLPFALDIGGATLSLLOLLID <sup>7</sup> VAYSQSAALANPVKLVLSN 231

Aae2 204 <sup>7</sup> V 204  
:  
Bba2 232 <sup>7</sup> L 232

Figure S1



# D

|      |     |                       |                     |                  |                             |                                            |                   |
|------|-----|-----------------------|---------------------|------------------|-----------------------------|--------------------------------------------|-------------------|
|      |     | 2                     |                     |                  | 3                           |                                            |                   |
| Ago1 | 44  | <u>CIGYTALVLSLVVQ</u> |                     |                  | TVLWQNEGDTSSAVRPSVGWSDYWYAM | <u>HSWLLNGLL</u> 93                        |                   |
|      |     |                       | :::                 |                  | :                           | :                                          |                   |
| Cre1 | 371 | CT                    | <u>GYLVMVLVGLVV</u> | -                | <u>TILIQ</u>                | SNSIFSSSLTPLVG-SGVVTLEQMYPL--VL 416        |                   |
|      |     |                       | 6                   |                  | 7                           |                                            |                   |
| Ago1 | 94  | 3                     | <u>ASQVLWG</u>      |                  |                             | TRLWG----                                  | FTGEPANRMSTAHRKMM |
|      |     | :                     |                     |                  | : :                         | :                                          |                   |
| Cre1 | 417 | <u>GSNI</u>           | --                  | <u>GTTFSGVLA</u> | <u>AFSTD</u>                | PSRFEKALHMAMCQVIYNI-- <u>IGTCLFYIV</u> 461 |                   |
|      |     |                       | 7                   |                  | 8                           |                                            |                   |
| Ago1 | 139 | 4                     | <u>SITQ</u>         |                  |                             | 142                                        |                   |
|      |     | :                     |                     |                  |                             |                                            |                   |
| Cre1 | 462 | <u>PCTR</u>           | 465                 |                  |                             |                                            |                   |
|      |     | 8                     |                     |                  |                             |                                            |                   |

# A

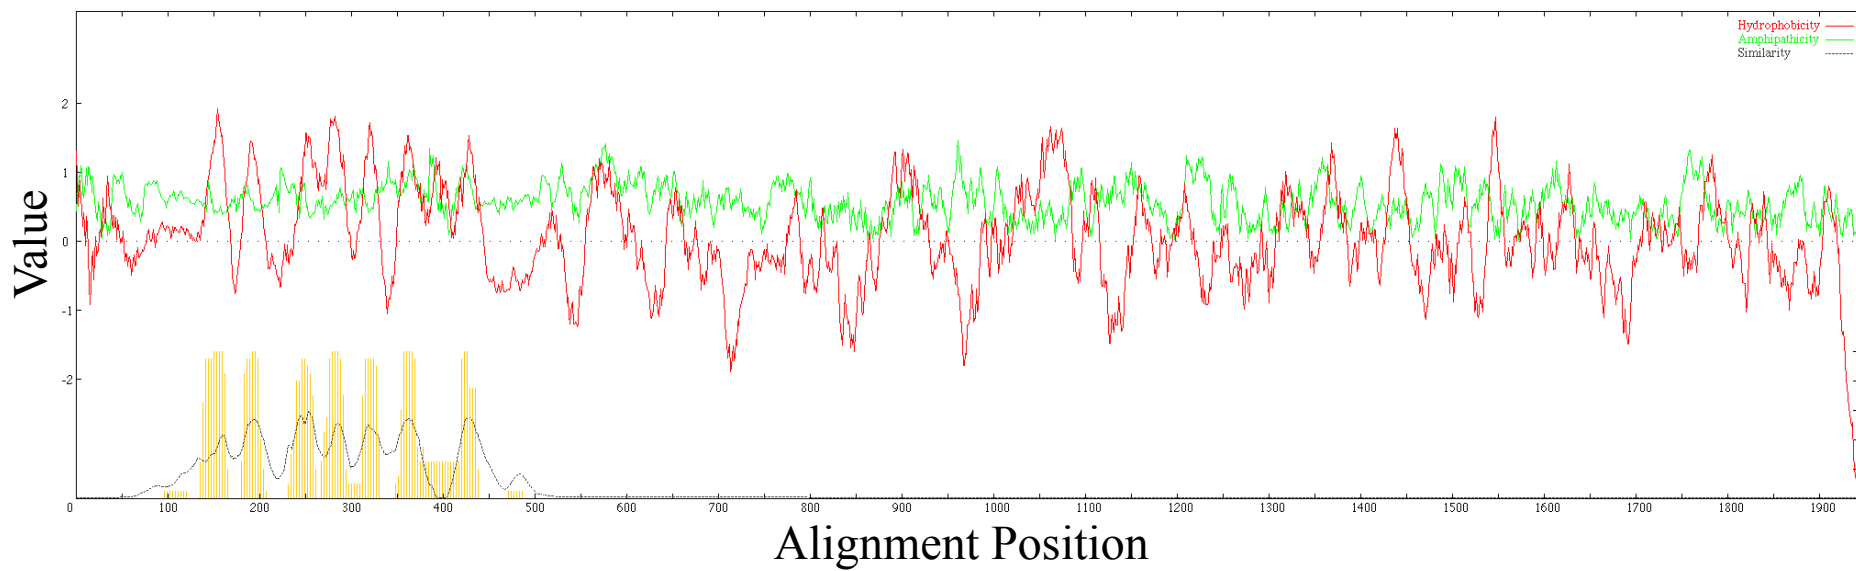

Figure S2



**A**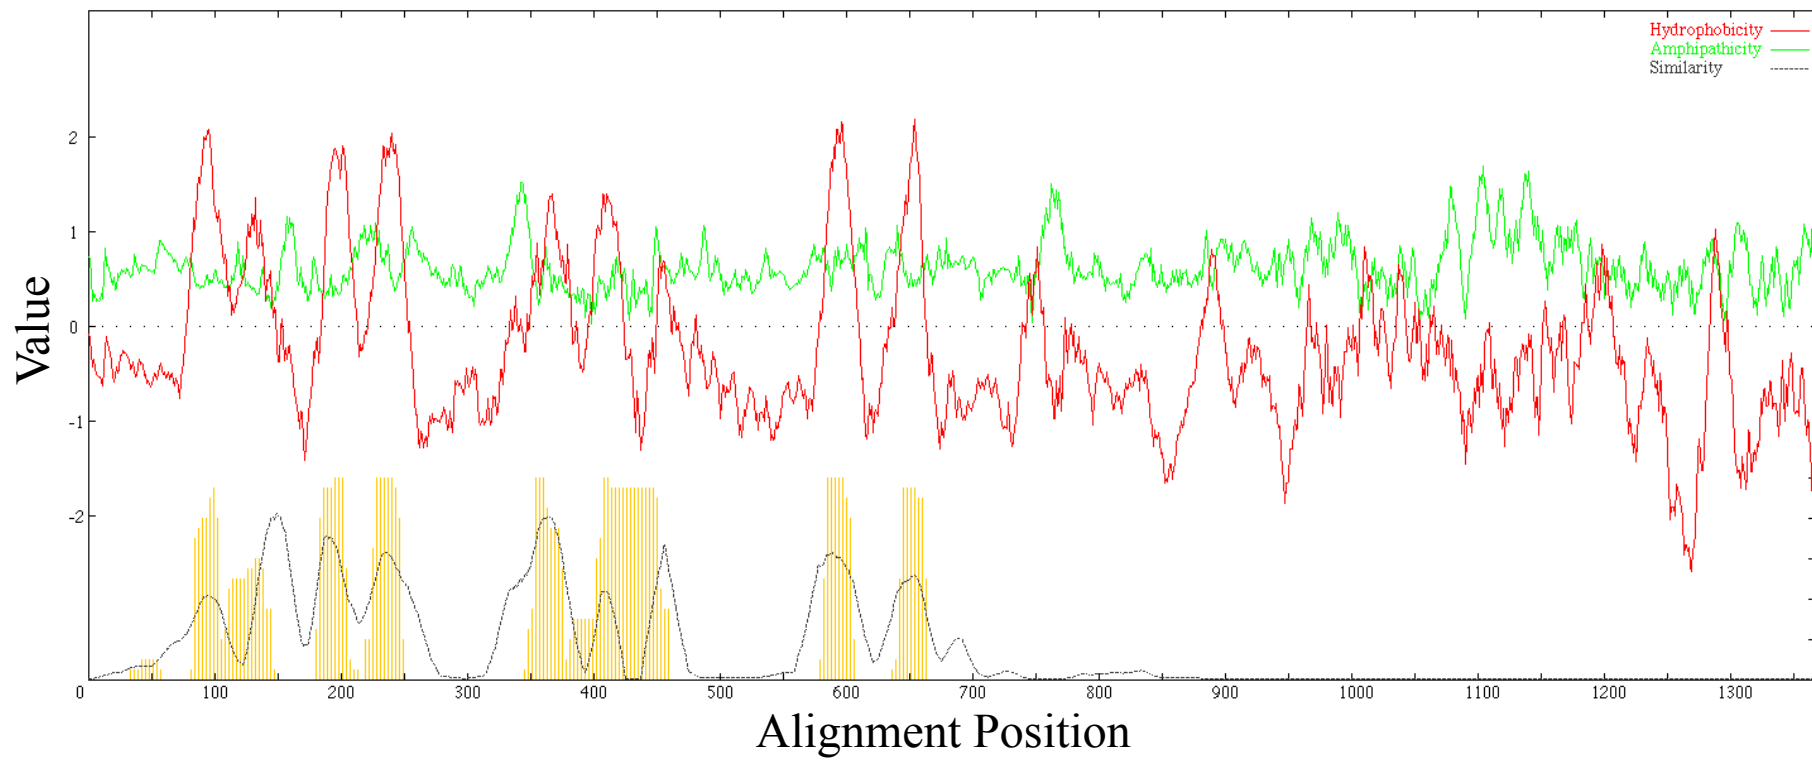**Figure S3**



C

Pla1 25 EGAHLHCRNDHAQSHHTPHTHSPRPKFLIRSTANSAIERRGNRSVSPVRG 74  
| | | | | | | | : | | : | | | |  
Bja1 179 EHGHHVHDH.DTHEHDHAHIPTPADI.....RAAKRKG.....VRG 215  
1 2  
Pla1 75 SMQLYLPIADL PVNVFLV LAMGA AVGFVSGMFGI GGG FLMTPLLIFIG.. 122  
: | : | : : | | | | | : : |  
Bja1 216 MAAMILSVGLRPCTGAILVLLFAV...TQAFSIG...VMSAIVMSVGTA 259  
4 5  
2 3  
Pla1 123 IT.PAVAVASVASHIAASSFSGAI.SYWRR...RAIDPALASVLLCGGVT 167  
| | | | | | | : | | | : | | : |  
Bja1 260 ITVSALALMTVFSKRLALRFAGGVDS PWARRVERGLK IAGGSVIL...LF 306  
5 6  
3  
Pla1 168 GTALGVWTFTO 178  
| | | | |  
Bja1 307 GMMLLVASFTTO 317  
6

Figure S3

**A**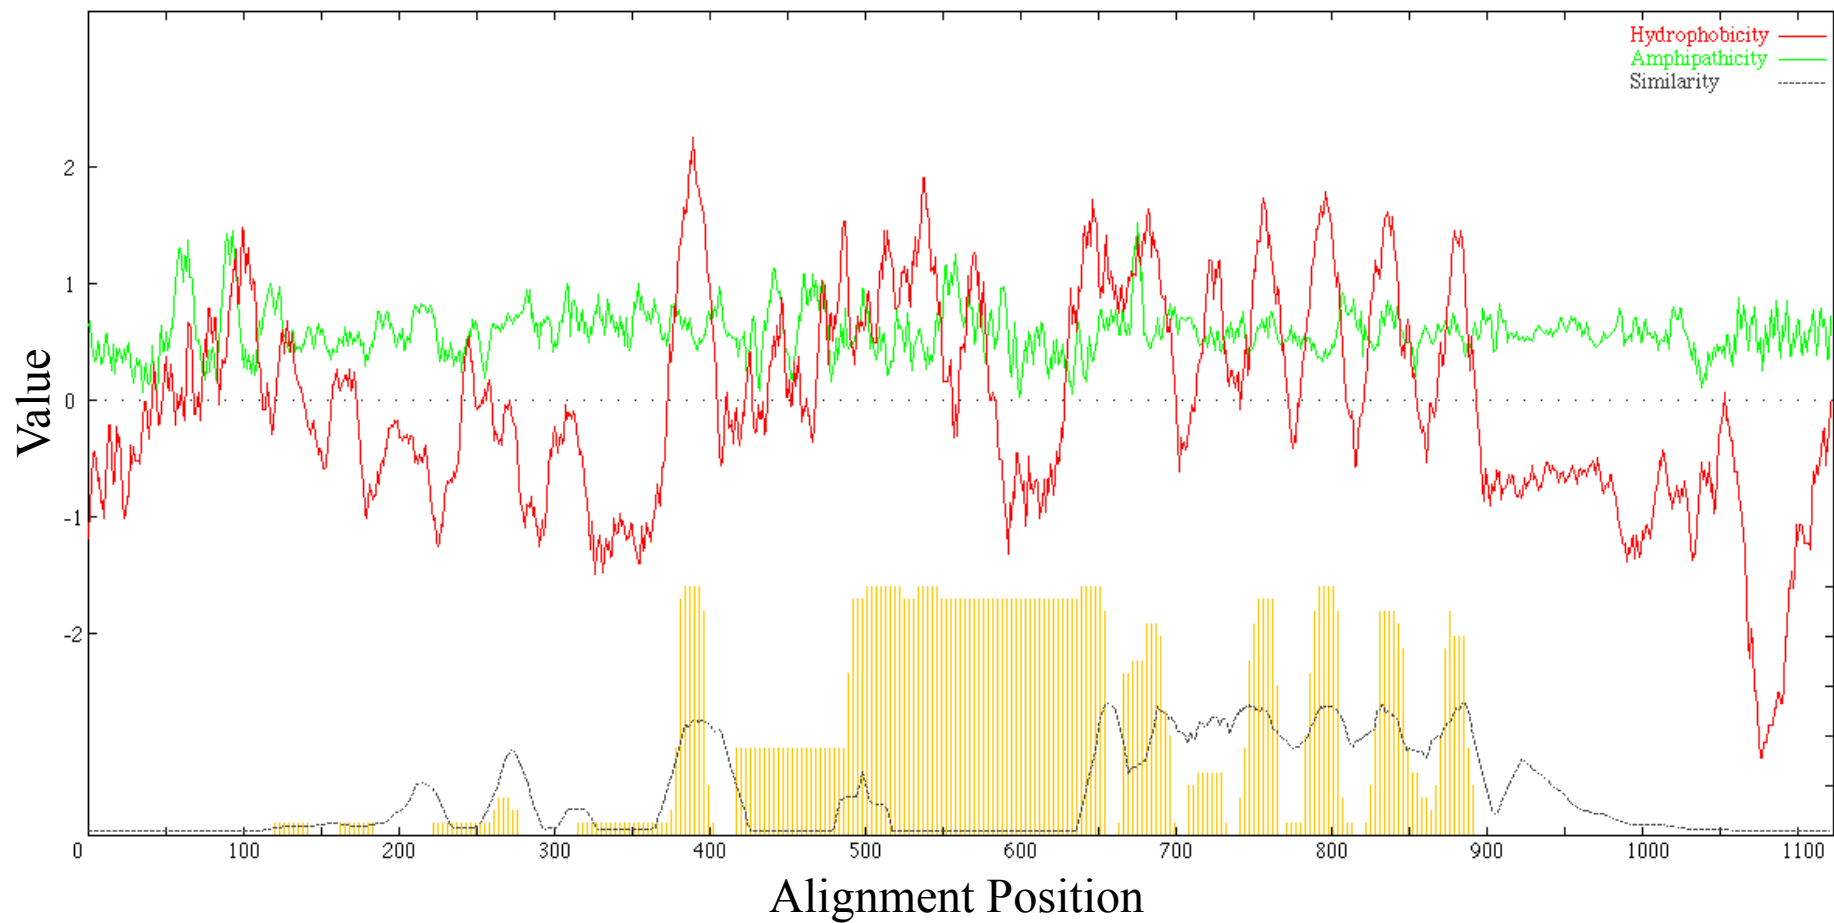**Figure S4**

**B**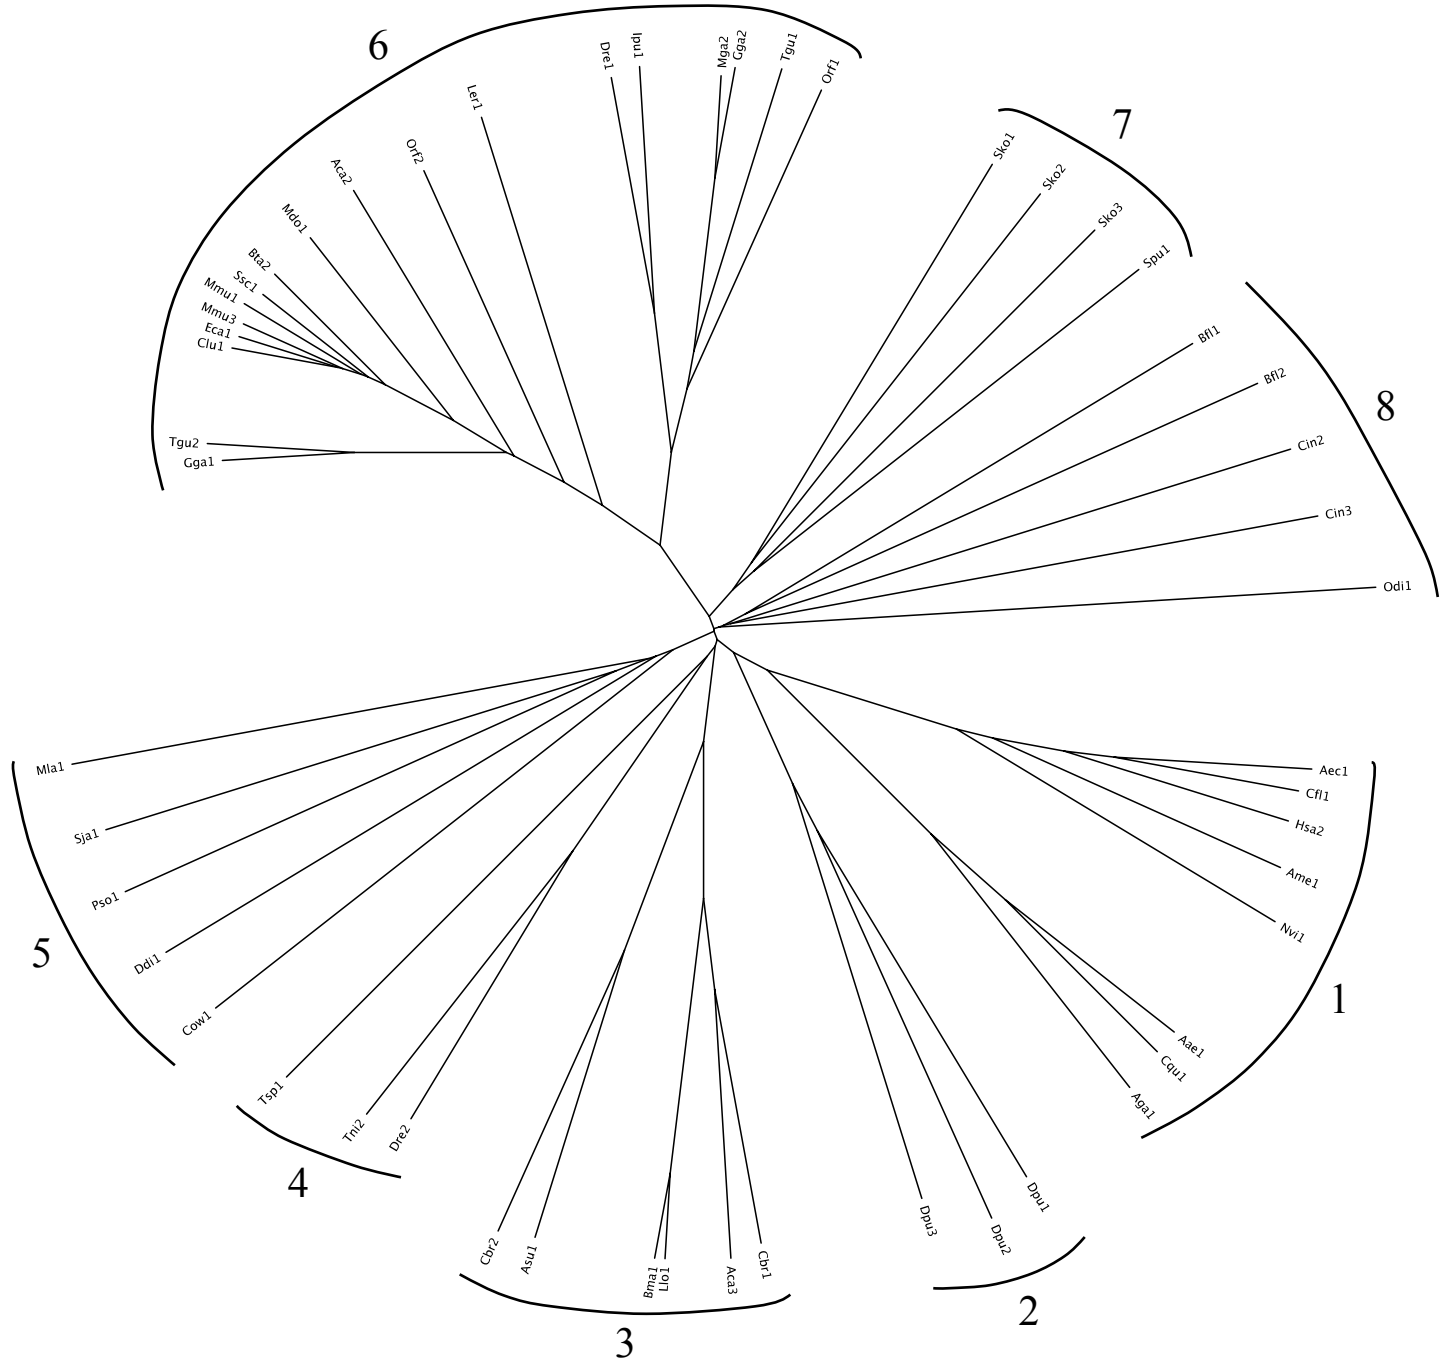**Figure S4**



C

Tsp1 35 LLGE PIHLAIGTSLTCI . VLSSLSASLTHIRR.GAVLYRVVLLK EVFSVP 82  
:| :|| | : | | : | | | :| | | ::: :| ||  
Cre2 1 MLRDPI TLGLATAATWLSVASAVTOILCHLRNYTEPLY ORYIIRIIFLVP 50  
1 2

Tsp1 83 FAVLGAYLSSM 93  
| :|| |  
Cre2 51 FYGVTSWLSIM 61  
2

# D

|      |     |                                                            |  |     |  |
|------|-----|------------------------------------------------------------|--|-----|--|
|      |     | 2                                                          |  | 3   |  |
| Drel | 1   | <u>ILFIVPIYAFDSWLSLLFFTNEEYYVYFDTVRDCYEAFVIYNFLSLCYEY</u>  |  | 50  |  |
|      |     | :  :: : : ::  : :  :     :  : : ::  ::                     |  |     |  |
| Gfo1 | 1   | <u>LLMVMPLPSAIAYLSIFYFISTPYYVYKE--RNNIDKLLLKK-LAIS-SL</u>  |  | 46  |  |
|      |     | 2                                                          |  | 3   |  |
|      |     | 3                                                          |  | 4   |  |
| Drel | 51  | <u>LGGESAIMAEIRGKPIQSSFVYGTCCCLWGRTYSIGFLRFCKQATLQFCVV</u> |  | 100 |  |
|      |     | :  :  :       : : :     :    :                             |  |     |  |
| Gfo1 | 47  | <u>VGVVAGIILLIYAKPILLK</u> KALGVFII---LFVLNSLRPKKE--LQ---L |  | 88  |  |
|      |     | 3                                                          |  |     |  |
|      |     | 4                                                          |  | 5   |  |
| Drel | 101 | <u>KPLMAIITVILQAFG</u> KYRDGDFNAAGGYLYVMIIYNVSVSLSLFALEFLE |  | 149 |  |
|      |     | :     :        :   : :   :                                 |  |     |  |
| Gfo1 | 89  | <u>GPKMKYTFGFL---GGFFSGVF-STGGPLYVMIVKNATPDVRTFRATMF</u>   |  | 133 |  |
|      |     | 4                                                          |  | 5   |  |

Figure S4

**A**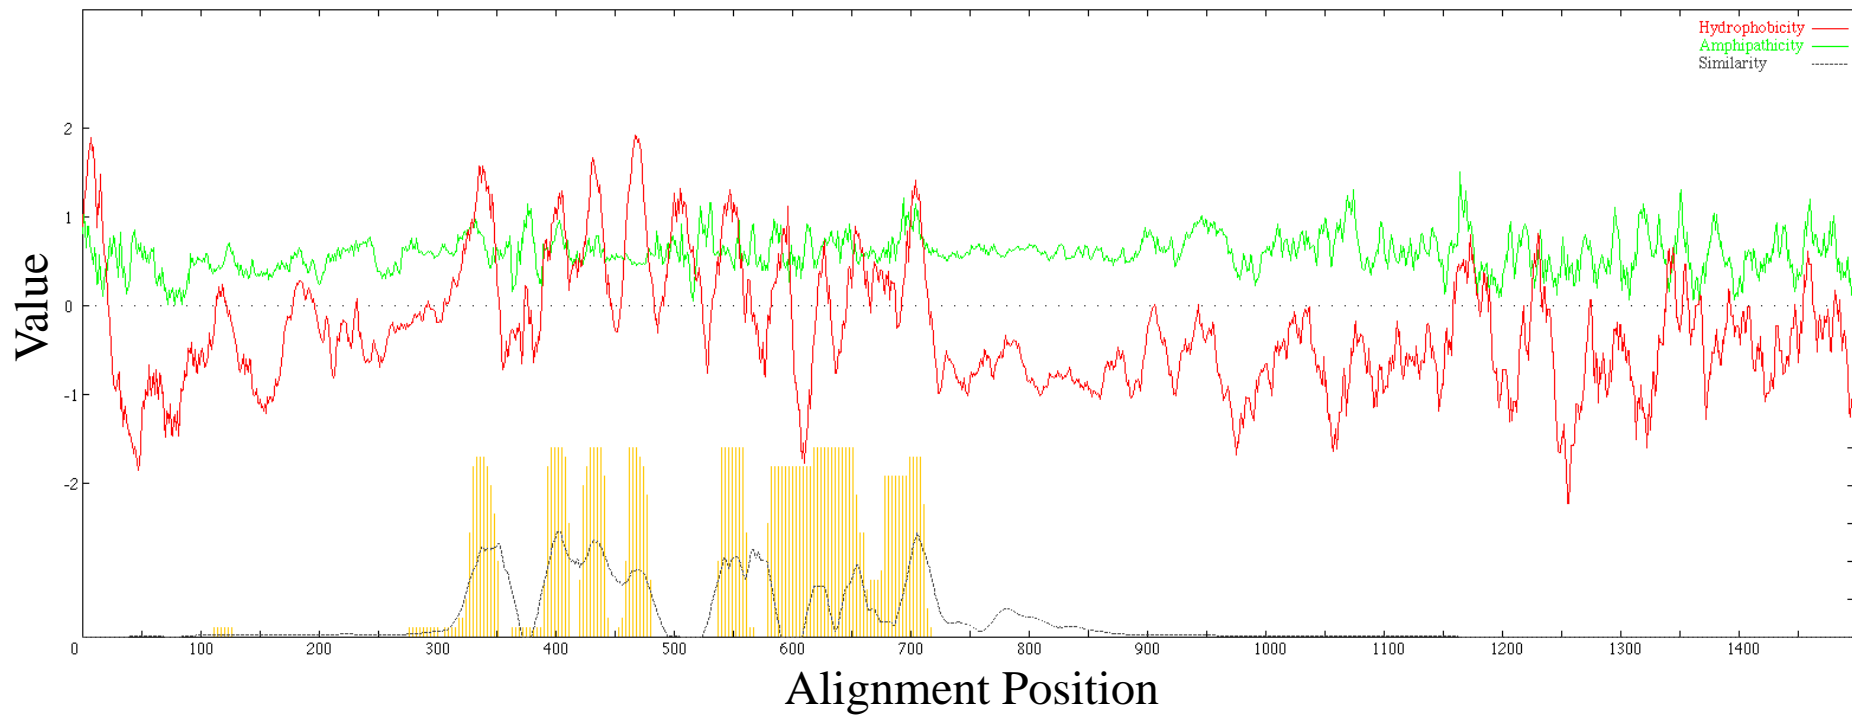**Figure S5**



C

Rco4 145 VAPLAIVRKVIKTKSVEEFMPFSLSFFLTLSAVMWFFYGFLKKDLYVAVPN 194  
:|: : | : ||: |: : : | | | | |:| : :  
Ath8 249 LAPIKPLAKFLTFKSIVELTWWQGIIVAFLFSMGLFKGSLAKELKTRIQD 298

6

Rco4 195 -ILGFMFGVLQMI-LYLIYRNPKKTGDDDQKANELPNQHSIIDVAKLNTR 242  
|: | : : | : | | | : : : : : | |  
Ath8 299 YIICIEMGIAAVVHLYVFPAAPIYKRGERCVRNVAVMSDYASLDVPPDPEE 348

7

Rco4 243 VSCCEPNATTVAHSRNDREEQQ 264  
| | | : |:| | : :  
Ath8 349 VKDSE-RTTRTRYGRHDEREKR 369

# D

Asu3 1 MKRRQLRFA**AIE-IIFLSLIHLYVEYS**QHAKKEIILDHLGYIC--**VAFNVA** 47  
:| | |::| :: :: |: : : | | :| | : | | : :|::  
Ncr1 137 IKRGI**LOYAWMKPVLALAAVIMKA**TGSYHEGDIKLNS-GYFWS**GIIYNIS** 185  
4 5  
Asu3 48 **-TVAAPLLALGE**VIRSKSTENL-PLP--**LCLANLLVTSEW--LLYGF**LVE 91  
| |: | | | : : |: | ||: :: | | | | | |  
Ncr1 186 **VTVSLYCLGLFWCMN**NDLKPFRRPMPKFLCVKAI**IFASYWQGFALGILV-** 234  
5 6  
Asu3 92 DFFIKFPN 99  
| | | | |  
Ncr1 235 **-FLGAFPN** 241  
6

**A**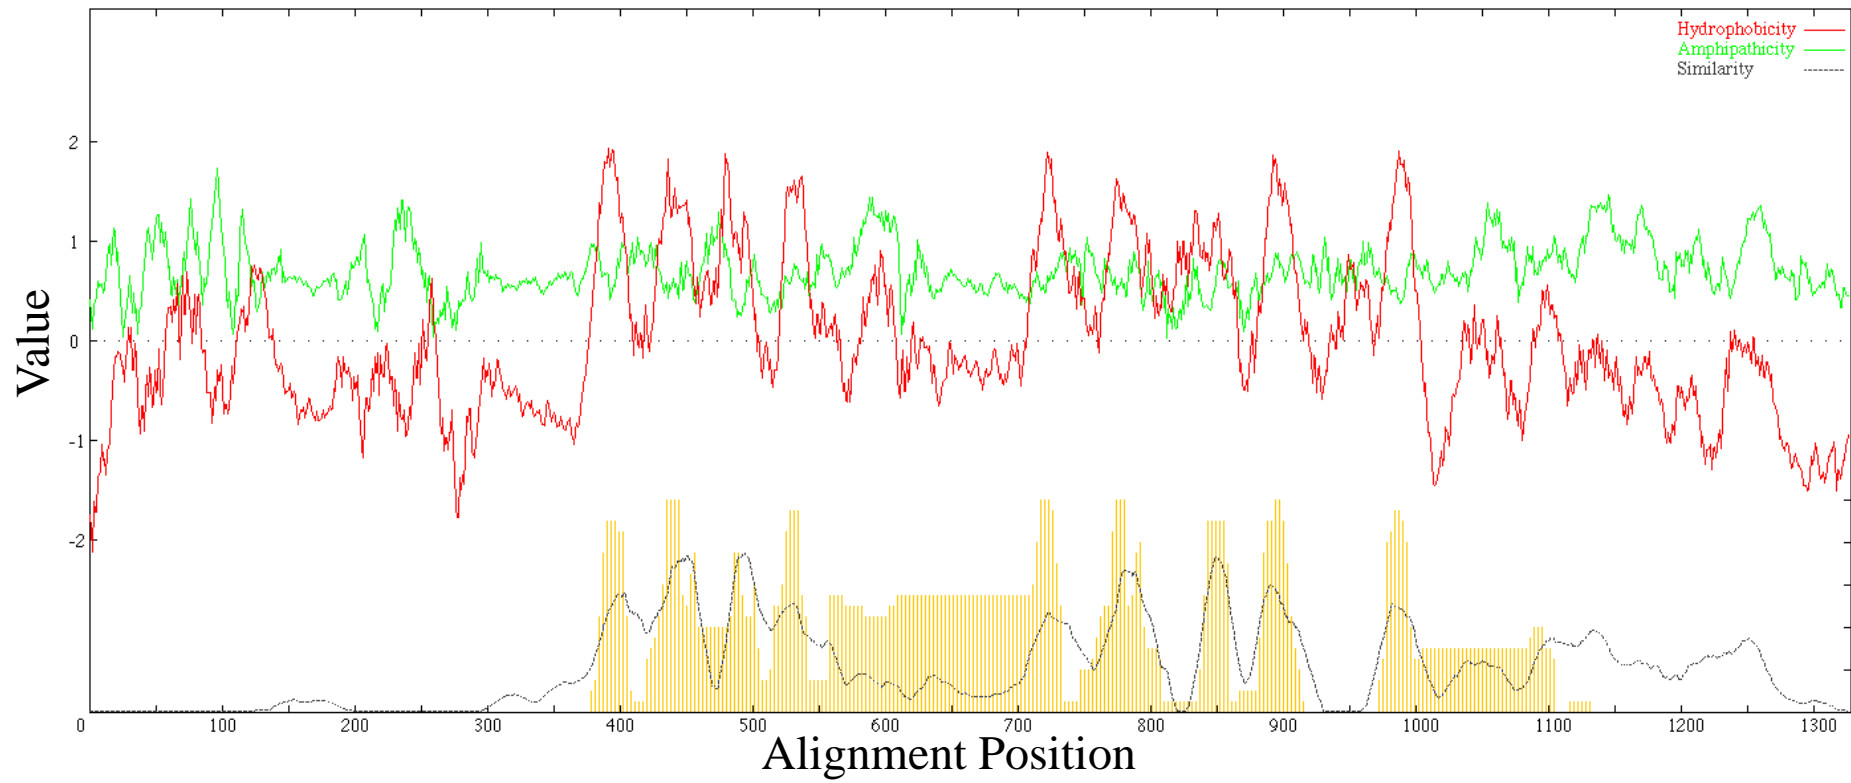**Figure S6**





C

```

          3                               4
Hwa1 129 ALSTPMILLALGVLADVDRGSLFTVIAADIGMCVTGLGAALITSSYLFRW 177
          :: ||:: |:||:: :|| | | | | :||| || | |
Odi8 239 SILTPIV--AIGVVS-IDRAYPIT-IGAHIGTTITGLIAAFSNSSGAFRK 284
          4                               5

          5
Hwa1 178 AFYI-ISCTFFVVVLFALLEWPVS 202
          | : :| || | | | | | :|
Odi8 285 ALQVALSHVEFNVEGFTLEFLIPIT 309
          6
```

**A**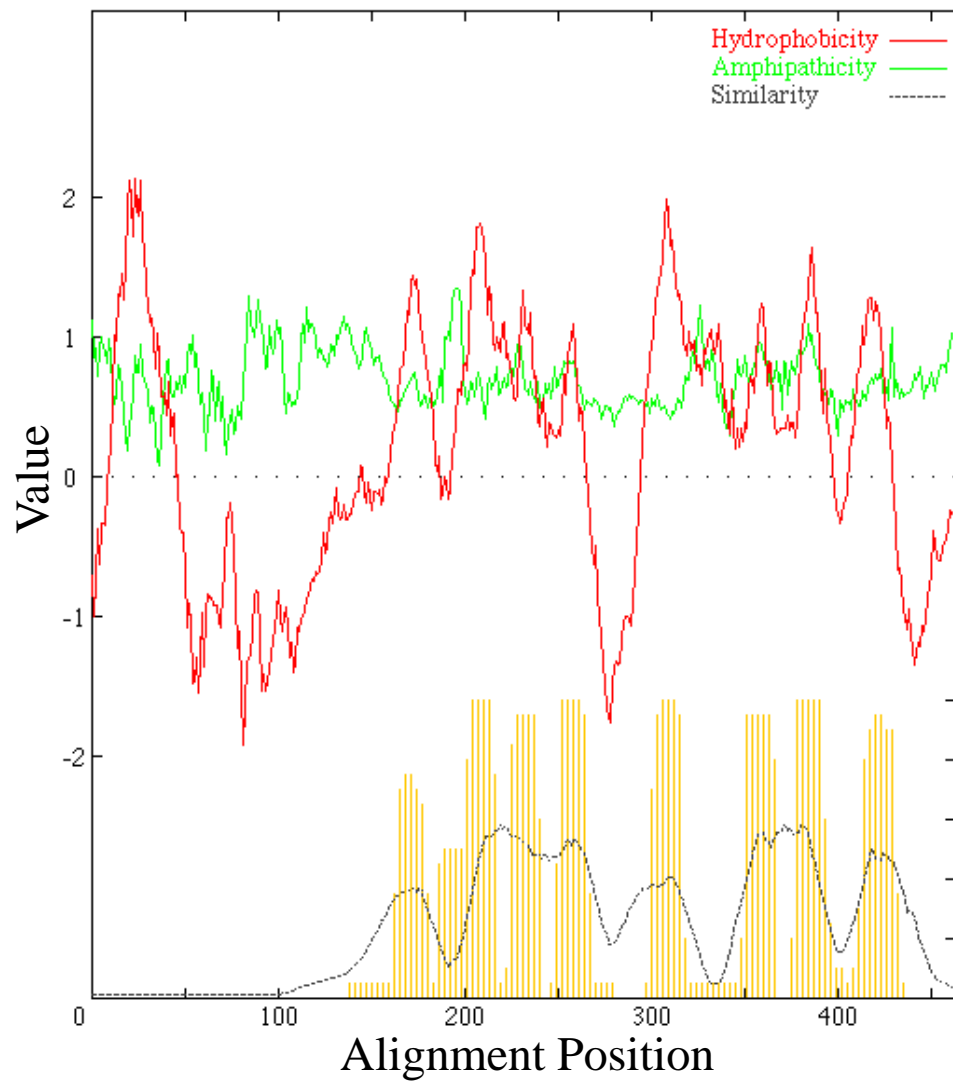**Figure S7**

**B**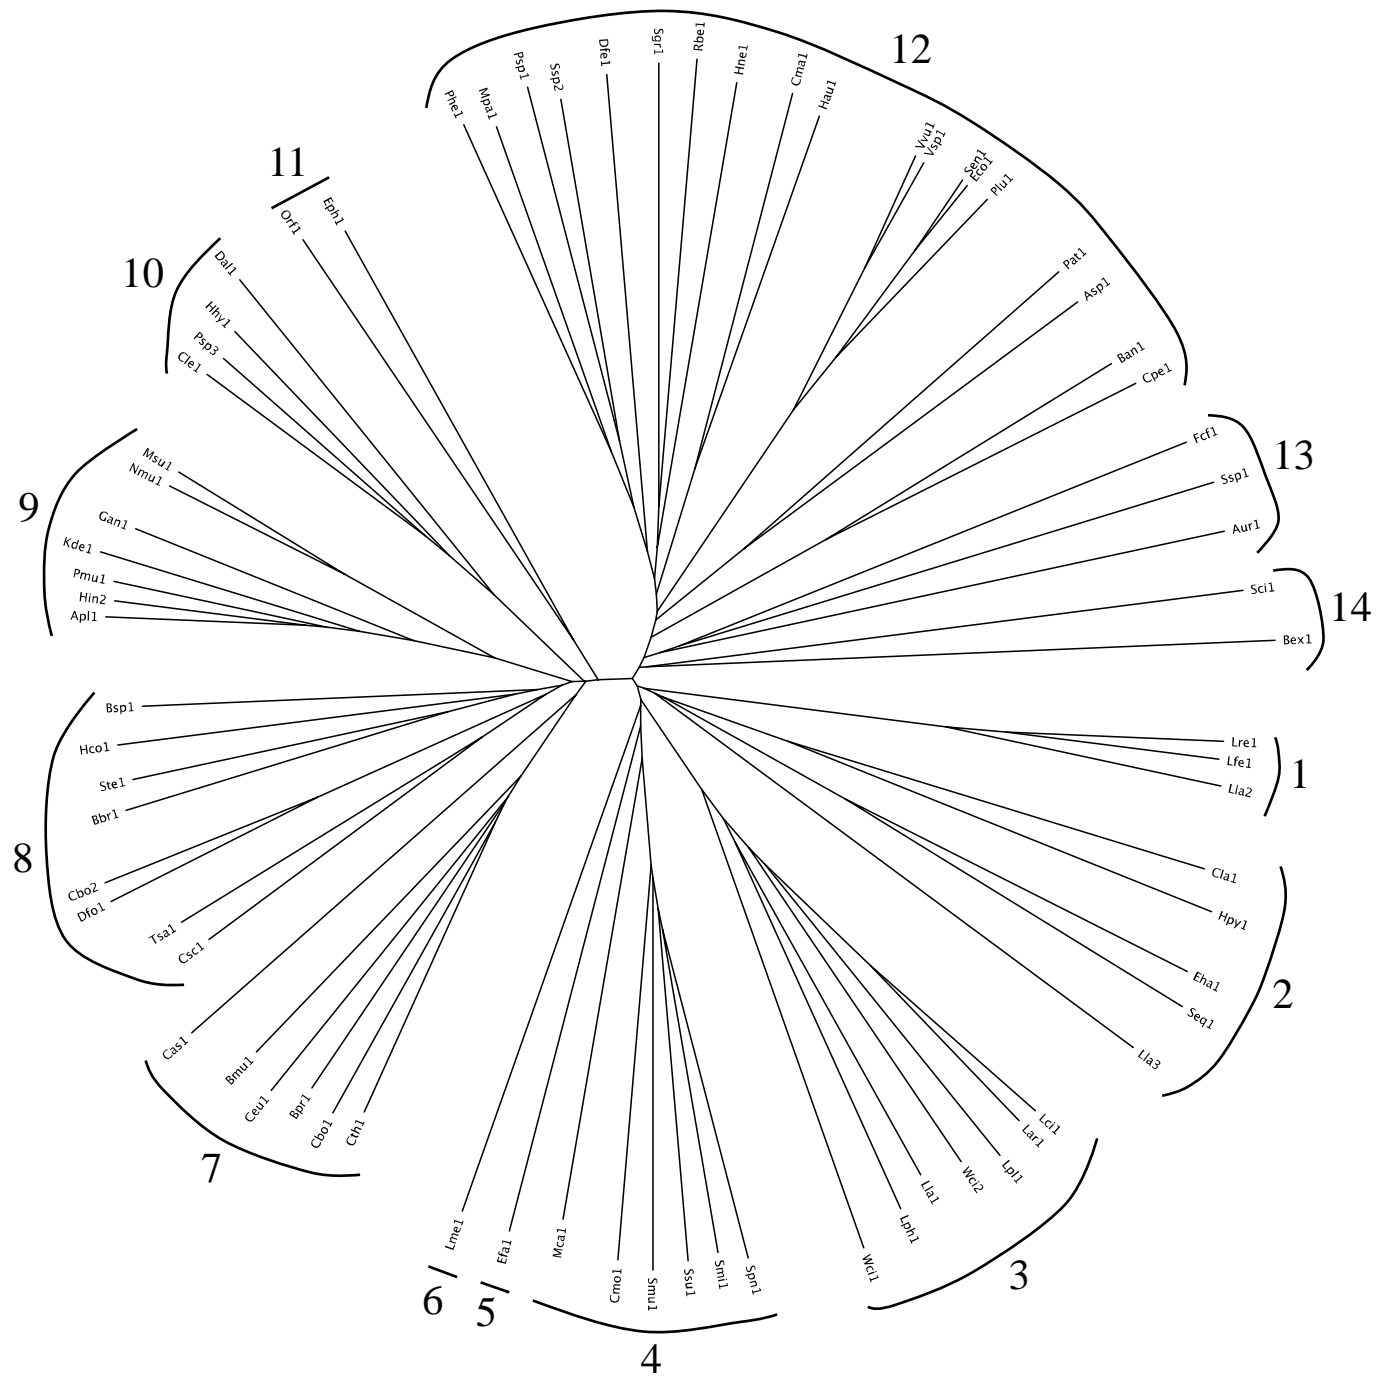**Figure S7**

# C

|      |     |             |                            |                   |          |           |                    |                         |
|------|-----|-------------|----------------------------|-------------------|----------|-----------|--------------------|-------------------------|
|      |     | 1           |                            | 2                 |          |           | 3                  |                         |
| Spr1 | 38  | <u>MR</u>   | RTVWAWP                    | <u>VGIIGNLLLE</u> | FTVFMGVW | FTNPQEHSL | <u>FGQAARQVFFI</u> | ATSV 87                 |
|      |     | :::         |                            | :                 | :        |           | :                  | :                       |
|      |     |             | :                          | :                 | :        | :         |                    | :                       |
| Cba4 | 71  | LKKIV       | <u>AVMAVGIVGGIFLKGFFAG</u> | -----             | RERML    | <u>Y</u>  | --                 | <u>ALLGLFVVCLSV</u> 112 |
|      |     |             | 3                          |                   |          |           |                    | 4                       |
|      |     | 3           |                            |                   |          |           |                    |                         |
| Spr1 | 88  | <u>YGWW</u> | RWQQSRTRAKGE               |                   |          |           |                    | 104                     |
|      |     |             | :                          | :                 | :        | :         |                    |                         |
| Cba4 | 113 | <u>QGLW</u> | KLRMERQEEAKGQ              |                   |          |           |                    | 129                     |
|      |     | 4           |                            |                   |          |           |                    |                         |

Figure S7

# D

```

      2           3
Sde2 1 AILFFDASLLMDSALNAYYLIMAVYGWYAAWKHGKKGNEEREVSSWRMIKH 50
      |: :|| | : : :|::|:|: :|:: : :| |||: :
Ere1 1 ALAGYDAVLY--KFLGIFVIFLAIHGfYS-IYGQRQRTKEKSSWKSMLL 47
      3           4           5
Sde2 51 L---KII--LFLTFLSLLIGYVMDTYTRADFAYLDSATTVFAVFTTYMLA 95
      | : :|:: ||||| : : : :|: : : :|
Ere1 48 LIGAGIVHGMFVSGGPLLIGY-LSNEIKEKTSFRATISTVWIILNSMILV 96
      5           6

Sde2 96 QKI 98
      | |
Ere1 97 QDI 99
```

**A**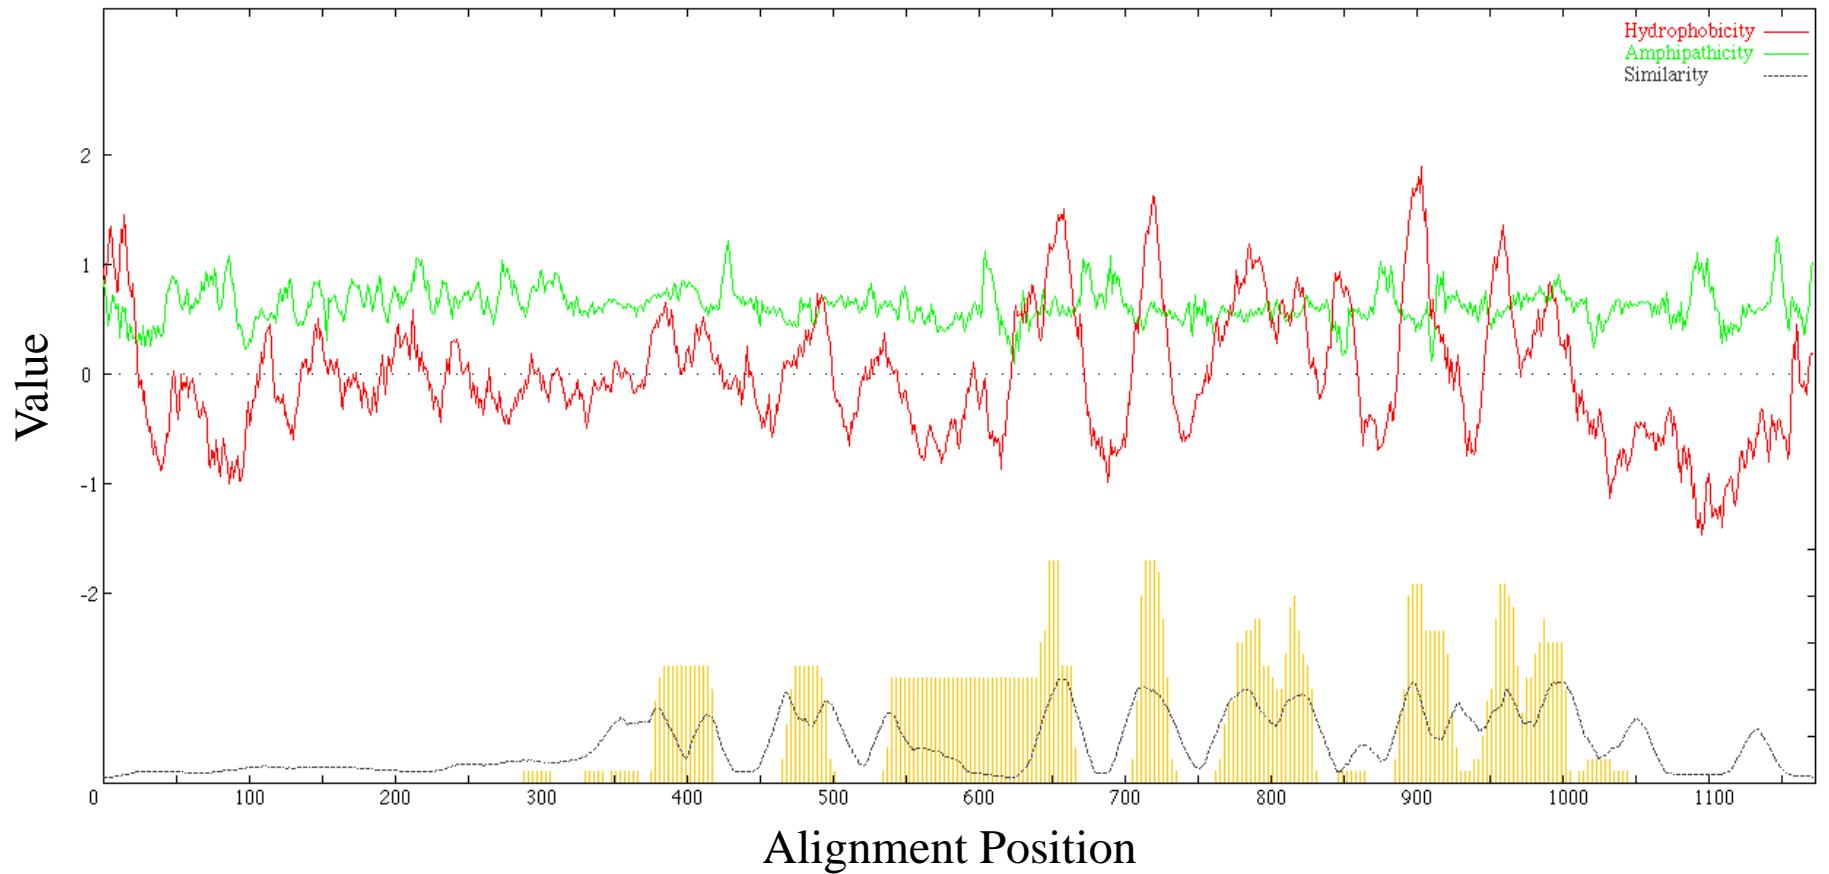**Figure S8**

**B**

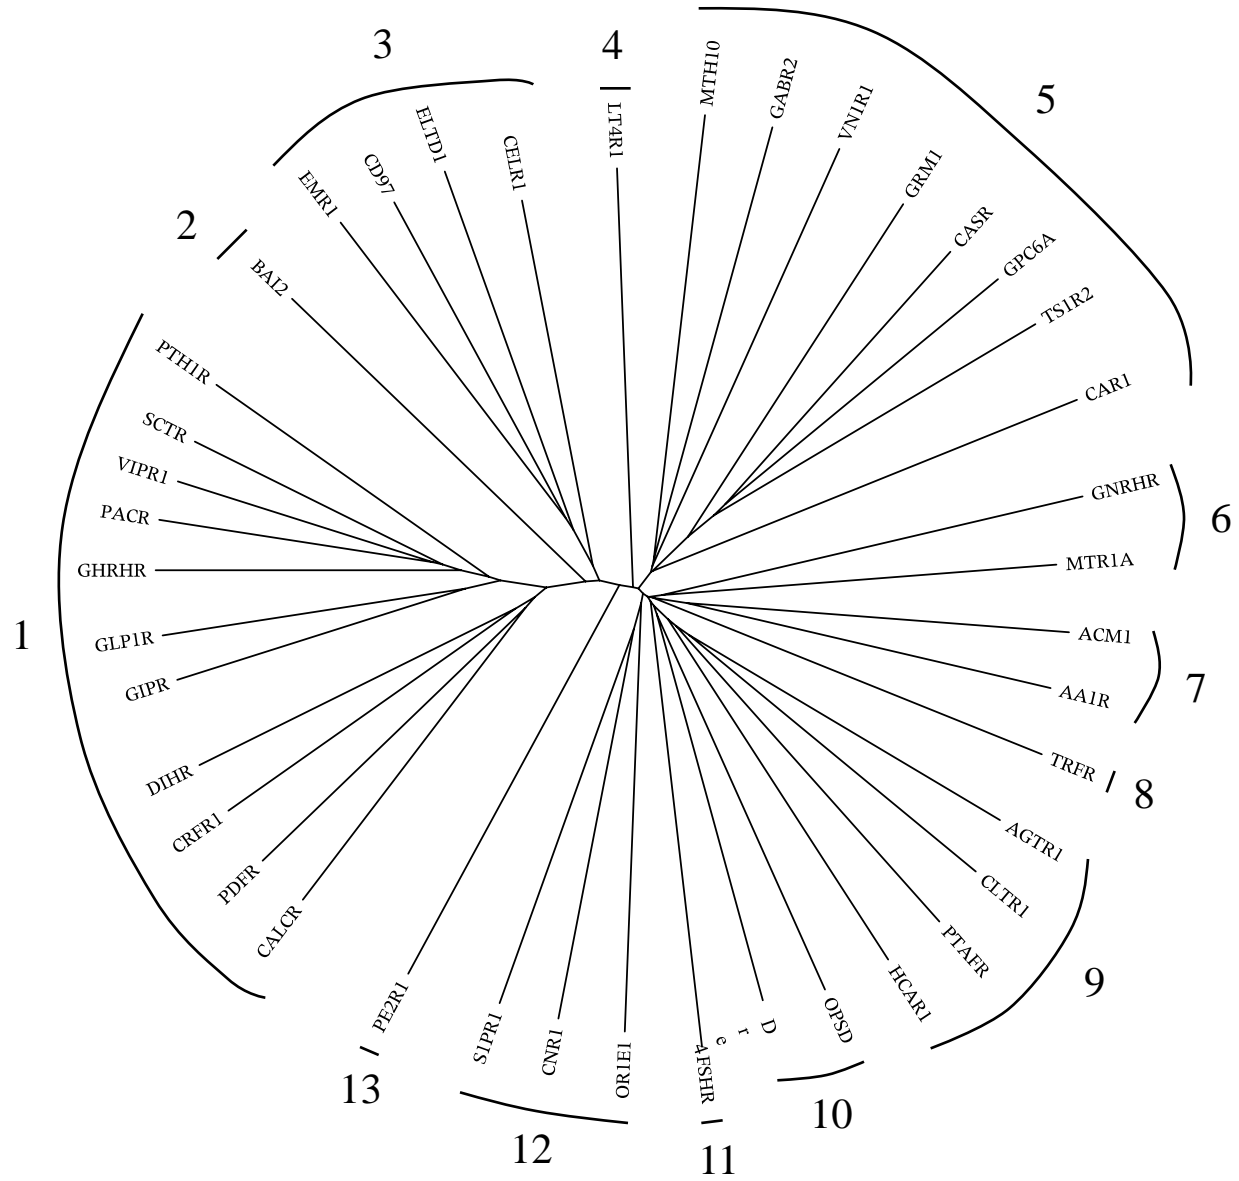

**Figure S8**

C

Dre1 183 GLF-<sup>5</sup>ISLPIIAYCYLRVLMVVKKTKNSKKNRAIKLI<sup>6</sup>LGIVIMFVVFVWPY 230  
||| || | :| : | | :| || ||| : | |: |  
Mos1 165 GLFTISCLFFLYVLWGLLEFSARNTAFGKSDRVGKLY<sup>5</sup>LGIAVYTAVLWIAI<sup>6</sup> 214

Dre1 231 <sup>6</sup>NVV-VFLKTLHEFDMLTSCEPYKIINMA 258  
|| | : : | | |::|  
Mos1 215 <sup>6</sup>PVVWAFAEGTNSITGDTEVL<sup>7</sup>AYAILDIA 242





**E**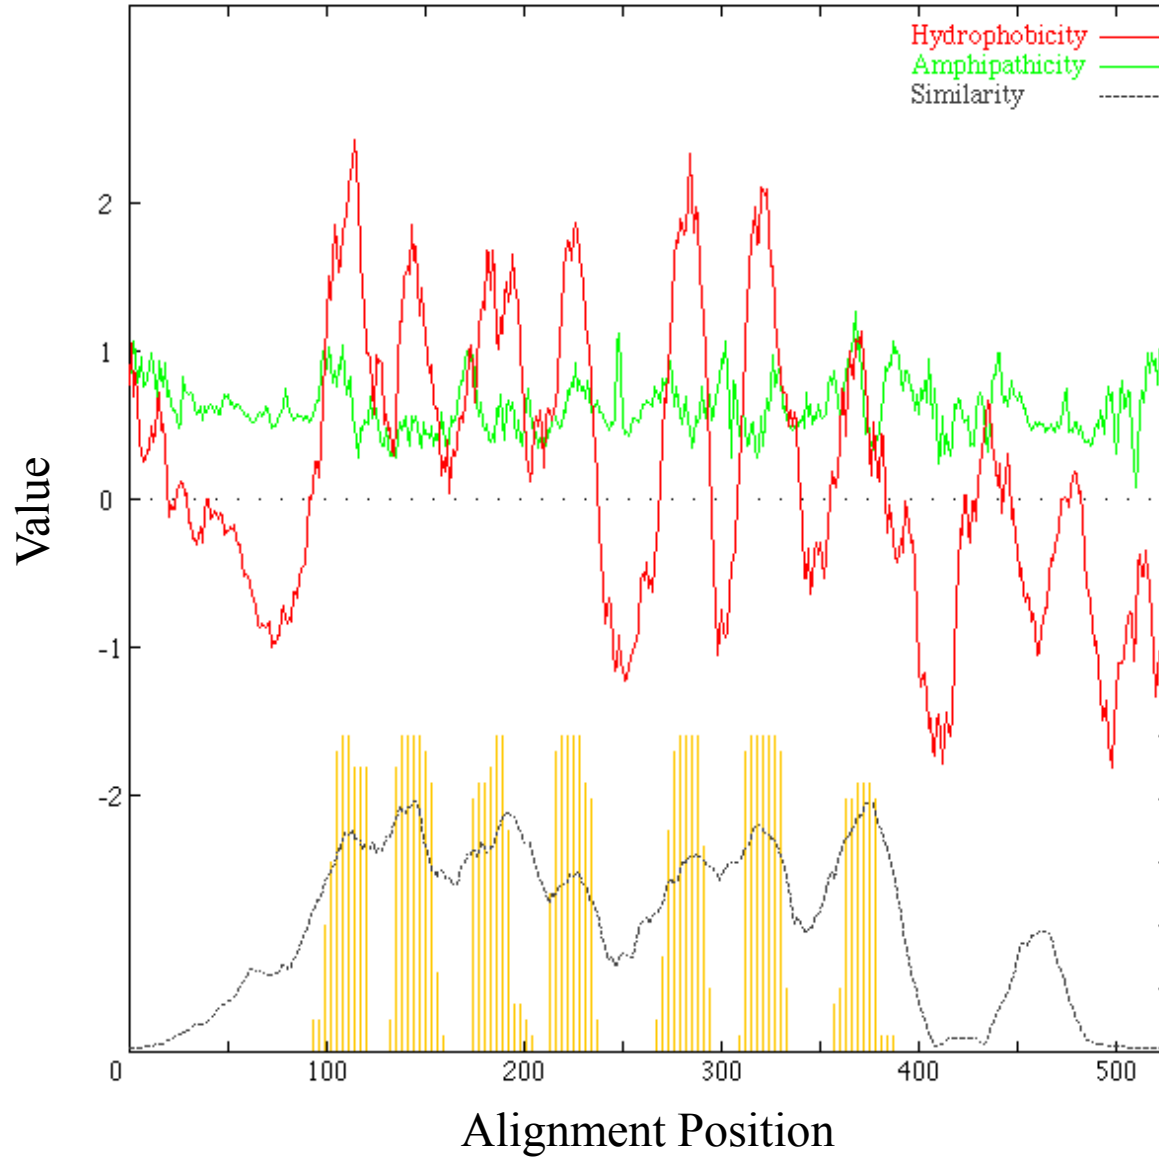**Figure S8**

F

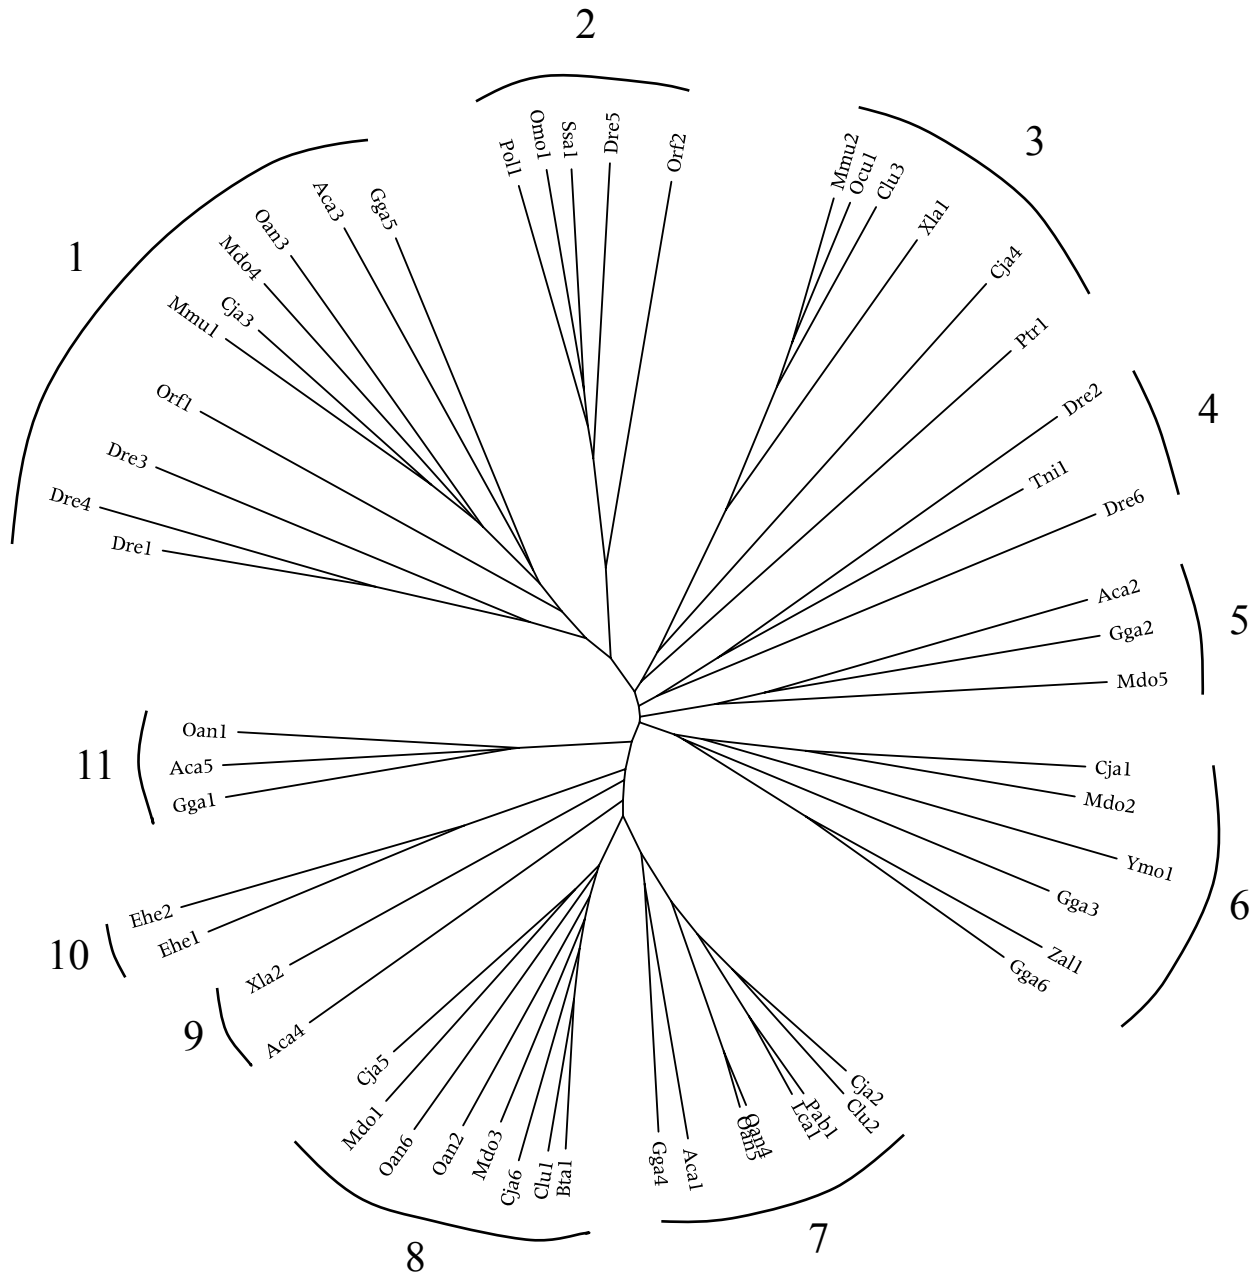

Figure S8

**A)**

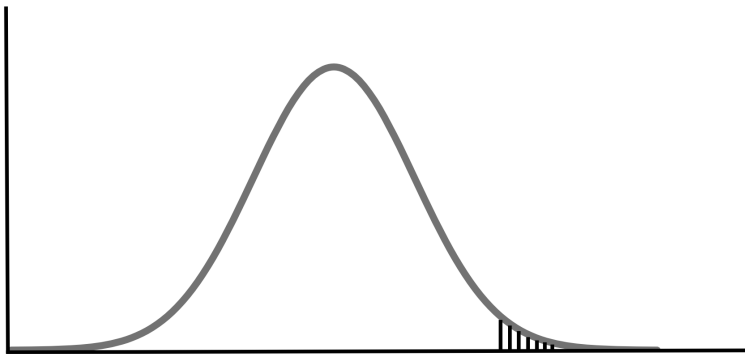

$\bar{X}$  = Mean bit score of the 2,000 shuffled NW (Needleman-Wunsch) scores of two proteins' aa residues

$X$  = Raw unshuffled NW bitscore of two proteins

$\sigma$  = SD of the 2,000 shuffled NW scores of two proteins' aa residues

$Z = \frac{X - \bar{X}}{\sigma} = \text{Standard score}$

**B)**  $N\text{Integrate}[(1/\text{Sqrt}[2*\text{Pi}])*E^{(-.5*x^2)}, \{x, (z \text{ score}), \text{Infinity}\}]$

**C)**  $12.0 = 1.77648 * 10^{-33}$

$10.5 = 4.31901 * 10^{-26}$

$9.2 = 1.78975 * 10^{-20}$

Figure S9

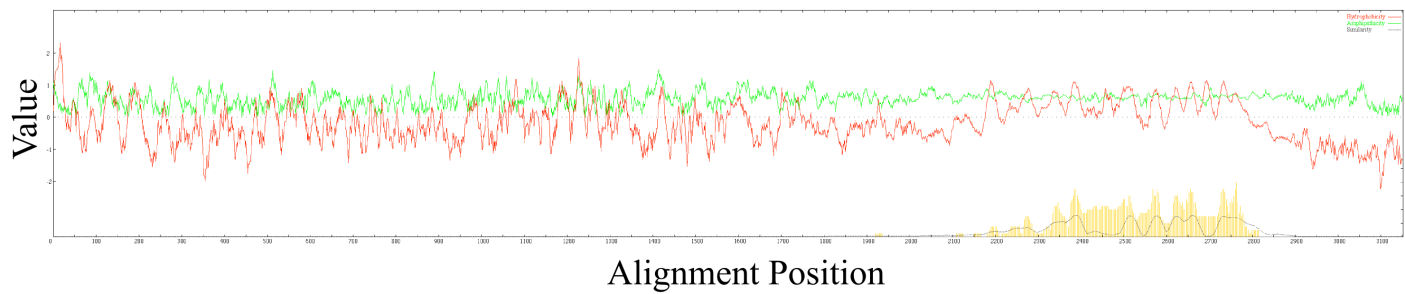

Figure S10



**Table S1.** 135 LCT protein sequences included in this study. Proteins are listed clockwise starting from Cluster 1 (see Fig. S1). Protein abbreviations, taxonomic origins, protein sizes (aas), gi numbers, organismal phyla and organismal domains are included. Average size and standard deviation values are provided for each cluster having over 1 member. The same convention is used for subsequent tables listing family homologues.

| Abbreviation               | Organism                    | GenBank Index# | Group            | Domain    | Protein Size |
|----------------------------|-----------------------------|----------------|------------------|-----------|--------------|
| Cluster 1                  |                             |                |                  |           |              |
| Cva1                       | <i>Chlorella variabilis</i> | 307104348      | Viridiplantae    | Eukaryota | 321          |
| Cva2                       | <i>Chlorella variabilis</i> | 307104349      | Viridiplantae    | Eukaryota | 407          |
|                            | <i>Albugo laibachii</i>     |                |                  |           |              |
| Ala1                       | <i>Nc14</i>                 | 325182632      | Albuginaceae     | Eukaryota | 314          |
|                            | <i>Phytophthora</i>         |                |                  |           |              |
| Pin1                       | <i>infestans T30-4</i>      | 301113472      | none             | Eukaryota | 301          |
| Tcr1                       | <i>Trypanosoma cruzi</i>    | 322825613      | Trypanosomatidae | Eukaryota | 383          |
|                            | <i>Ectocarpus</i>           |                |                  |           |              |
| Esi1                       | <i>siliculosus</i>          | 298705956      | Phaeophyceae     | Eukaryota | 307          |
|                            | <i>Aureococcus</i>          |                |                  |           |              |
| Aan2                       | <i>anophagefferens</i>      | 323456637      | Pelagophyceae    | Eukaryota | 273          |
|                            | <i>Phaeodactylum</i>        |                |                  |           |              |
|                            | <i>tricornutum CCAP</i>     |                |                  |           |              |
| Ptr2                       | <i>1055/1</i>               | 219112913      | Bacillariophyta  | Eukaryota | 252          |
| Average protein size (aas) |                             |                |                  |           | 320          |
| SD                         |                             |                |                  |           | 52           |
| Cluster 2                  |                             |                |                  |           |              |
|                            | <i>Batrachochytrium</i>     |                |                  |           |              |
|                            | <i>dendrobatidis</i>        |                |                  |           |              |
| Bde1                       | <i>JAM81</i>                | 328771916      | Fungi            | Eukaryota | 294          |
|                            | <i>Caenorhabditis</i>       |                |                  |           |              |
| Cbr1                       | <i>briggsae</i>             | 268530370      | Metazoa          | Eukaryota | 403          |
|                            | <i>Caenorhabditis</i>       |                |                  |           |              |
| Cre1                       | <i>remanei</i>              | 308510650      | Metazoa          | Eukaryota | 404          |
|                            | <i>Caenorhabditis</i>       |                |                  |           |              |
| Cell                       | <i>elegans</i>              | 17532373       | Metazoa          | Eukaryota | 404          |
| Asu1                       | <i>Ascaris suum</i>         | 324511247      | Metazoa          | Eukaryota | 421          |
| Average protein size (aas) |                             |                |                  |           | 385          |
| SD                         |                             |                |                  |           | 52           |
| Cluster 3                  |                             |                |                  |           |              |
| Ssc1                       | <i>Sus scrofa</i>           | 311268141      | Metazoa          | Eukaryota | 373          |
|                            | <i>Canis lupus</i>          |                |                  |           |              |
| Clu1                       | <i>familiaris</i>           | 73967293       | Metazoa          | Eukaryota | 388          |
| Cja1                       | <i>Callithrix jacchus</i>   | 296201066      | Metazoa          | Eukaryota | 400          |
| Mmu1                       | <i>Mus musculus</i>         | 13752577       | Metazoa          | Eukaryota | 367          |
|                            | <i>Ornithorhynchus</i>      |                |                  |           |              |
| Oan1                       | <i>anatinus</i>             | 149641786      | Metazoa          | Eukaryota | 605          |
| Rno1                       | <i>Rattus norvegicus</i>    | 109465722      | Metazoa          | Eukaryota | 350          |

|           |                            |           |                |           |     |
|-----------|----------------------------|-----------|----------------|-----------|-----|
| Xla1      | <i>Xenopus laevis</i>      | 147899595 | Metazoa        | Eukaryota | 375 |
|           | <i>Xenopus (Silurana)</i>  |           |                |           |     |
| Orf1      | <i>tropicalis</i>          | 118404708 | Metazoa        | Eukaryota | 376 |
| Dre1      | <i>Danio rerio</i>         | 66472608  | Metazoa        | Eukaryota | 384 |
|           | <i>Tetraodon</i>           |           |                |           |     |
| Tni1      | <i>nigroviridis</i>        | 47213130  | Metazoa        | Eukaryota | 404 |
|           | Average protein size (aas) |           |                |           | 402 |
|           | SD                         |           |                |           | 73  |
| Cluster 4 |                            |           |                |           |     |
|           | <i>Selaginella</i>         |           |                |           |     |
| Smo1      | <i>moellendorffii</i>      | 302822928 | Viridiplantae  | Eukaryota | 280 |
|           | <i>Physcomitrella</i>      |           |                |           |     |
|           | <i>patens</i> subsp.       |           |                |           |     |
| Ppa4      | <i>patens</i>              | 168022702 | Viridiplantae  | Eukaryota | 291 |
| Vvi1      | <i>Vitis vinifera</i>      | 225452224 | Viridiplantae  | Eukaryota | 274 |
| Vvi2      | <i>Vitis vinifera</i>      | 296081320 | Viridiplantae  | Eukaryota | 255 |
|           | <i>Populus</i>             |           |                |           |     |
| Ptr1      | <i>trichocarpa</i>         | 224141271 | Viridiplantae  | Eukaryota | 274 |
| Rco1      | <i>Ricinus communis</i>    | 255571996 | Viridiplantae  | Eukaryota | 244 |
|           | <i>Arabidopsis</i>         |           |                |           |     |
| Ath1      | <i>thaliana</i>            | 21553944  | Viridiplantae  | Eukaryota | 270 |
|           | <i>Hordeum vulgare</i>     |           |                |           |     |
| Hvu1      | subsp. <i>vulgare</i>      | 326491617 | Viridiplantae  | Eukaryota | 275 |
|           | <i>Oryza sativa</i>        |           |                |           |     |
| Osa1      | <i>Japonica Group</i>      | 115488162 | Viridiplantae  | Eukaryota | 268 |
| Psi1      | <i>Picea sitchensis</i>    | 116784154 | Viridiplantae  | Eukaryota | 272 |
|           | Average protein size (aas) |           |                |           | 270 |
|           | SD                         |           |                |           | 13  |
| Cluster 5 |                            |           |                |           |     |
|           | <i>Trichoplax</i>          |           |                |           |     |
| Tad1      | <i>adhaerens</i>           | 196011156 | Metazoa        | Eukaryota | 262 |
|           | <i>Capsaspora</i>          |           |                |           |     |
|           | <i>owczarzaki</i> ATCC     |           |                |           |     |
| Cow1      | 30864                      | 320169718 | Ichthyosporea  | Eukaryota | 389 |
|           | <i>Salpingoeca</i> sp.     |           |                |           |     |
| Ssp2      | ATCC 50818                 | 326433282 | Salpingoecidae | Eukaryota | 413 |
|           | <i>Trichoplax</i>          |           |                |           |     |
| Tad2      | <i>adhaerens</i>           | 196001949 | Metazoa        | Eukaryota | 335 |
|           | <i>Nematostella</i>        |           |                |           |     |
| Nve1      | <i>vectensis</i>           | 156400754 | Metazoa        | Eukaryota | 259 |
| Cin1      | <i>Ciona intestinalis</i>  | 198418241 | Metazoa        | Eukaryota | 399 |
|           | <i>Saccoglossus</i>        |           |                |           |     |
| Skol      | <i>kowalevskii</i>         | 291224563 | Metazoa        | Eukaryota | 384 |
| Spu2      | <i>Strongylocentrotus</i>  | 115676820 | Metazoa        | Eukaryota | 369 |



|           |                                       |           |         |           |     |
|-----------|---------------------------------------|-----------|---------|-----------|-----|
|           | <i>purpuratus</i>                     |           |         |           |     |
|           | Average protein size (aas)            |           |         |           | 351 |
|           | SD                                    |           |         |           | 61  |
| Cluster 6 |                                       |           |         |           |     |
| Dfa1      | <i>Dictyostelium fasciculatum</i>     | 328875158 | none    | Eukaryota | 689 |
| Ppa3      | <i>Polysphondylium pallidum PN500</i> | 281212356 | none    | Eukaryota | 271 |
| Dpu2      | <i>Dictyostelium purpureum</i>        | 330801850 | none    | Eukaryota | 285 |
| Ddi1      | <i>Dictyostelium discoideum AX4</i>   | 66815053  | none    | Eukaryota | 284 |
| Dpu3      | <i>Dictyostelium purpureum</i>        | 330801852 | none    | Eukaryota | 288 |
|           | Average protein size (aas)            |           |         |           | 363 |
|           | SD                                    |           |         |           | 182 |
| Cluster 7 |                                       |           |         |           |     |
| Isc1      | <i>Ixodes scapularis</i>              | 240999715 | Metazoa | Eukaryota | 266 |
| Bfl1      | <i>Branchiostoma floridae</i>         | 260811948 | Metazoa | Eukaryota | 432 |
| Aae1      | <i>Aedes aegypti</i>                  | 157112357 | Metazoa | Eukaryota | 406 |
|           | <i>Culex</i>                          |           |         |           |     |
| Cqu2      | <i>quinquefasciatus</i>               | 170044802 | Metazoa | Eukaryota | 399 |
| Ada1      | <i>Anopheles darlingi</i>             | 312385713 | Metazoa | Eukaryota | 524 |
|           | <i>Anopheles gambiae</i>              |           |         |           |     |
| Aga1      | <i>str. PEST</i>                      | 333468595 | Metazoa | Eukaryota | 461 |
|           | <i>Anopheles gambiae</i>              |           |         |           |     |
| Aga4      | <i>str. PEST</i>                      | 333468594 | Metazoa | Eukaryota | 376 |
|           | <i>Drosophila</i>                     |           |         |           |     |
| Dmo1      | <i>mojavensis</i>                     | 195113659 | Metazoa | Eukaryota | 354 |
| Dvi1      | <i>Drosophila virilis</i>             | 195399488 | Metazoa | Eukaryota | 375 |
|           | <i>Drosophila</i>                     |           |         |           |     |
| Dgr1      | <i>grimshawi</i>                      | 195054092 | Metazoa | Eukaryota | 914 |
| Der1      | <i>Drosophila erecta</i>              | 194910616 | Metazoa | Eukaryota | 393 |
|           | <i>Drosophila</i>                     |           |         |           |     |
| Dan1      | <i>ananassae</i>                      | 194743940 | Metazoa | Eukaryota | 392 |
|           | <i>Drosophila</i>                     |           |         |           |     |
| Dpe1      | <i>persimilis</i>                     | 195166302 | Metazoa | Eukaryota | 389 |
|           | <i>Drosophila</i>                     |           |         |           |     |
| Dwi1      | <i>willistoni</i>                     | 195450813 | Metazoa | Eukaryota | 361 |
|           | <i>Acromyrmex</i>                     |           |         |           |     |
| Aec1      | <i>echinator</i>                      | 332023894 | Metazoa | Eukaryota | 415 |
|           | <i>Camponotus</i>                     |           |         |           |     |
| Cfl1      | <i>floridanus</i>                     | 307175251 | Metazoa | Eukaryota | 464 |

|                            |                                              |           |               |           |      |
|----------------------------|----------------------------------------------|-----------|---------------|-----------|------|
| Ame1                       | <i>Apis mellifera</i>                        | 328776401 | Metazoa       | Eukaryota | 463  |
| Nvi1                       | <i>Nasonia vitripennis</i>                   | 156553286 | Metazoa       | Eukaryota | 1165 |
|                            | <i>Tribolium</i>                             |           |               |           |      |
| Tca2                       | <i>castaneum</i>                             | 270014202 | Metazoa       | Eukaryota | 367  |
| Dpu1                       | <i>Daphnia pulex</i>                         | 321471968 | Metazoa       | Eukaryota | 252  |
|                            | <i>Acyrtosiphon</i>                          |           |               |           |      |
| Api1                       | <i>pisum</i>                                 | 328710507 | Metazoa       | Eukaryota | 403  |
|                            | <i>Pediculus humanus</i>                     |           |               |           |      |
| Phu1                       | <i>corporis</i>                              | 242006380 | Metazoa       | Eukaryota | 356  |
| Ccl1                       | <i>Caligus clemensi</i>                      | 225717886 | Metazoa       | Eukaryota | 409  |
| Average protein size (aas) |                                              |           |               |           | 449  |
| SD                         |                                              |           |               |           | 199  |
| Cluster 8                  |                                              |           |               |           |      |
| Aga3                       | <i>Anopheles gambiae</i><br><i>str. PEST</i> | 333470136 | Metazoa       | Eukaryota | 376  |
| Aga5                       | <i>Anopheles gambiae</i><br><i>str. PEST</i> | 158301831 | Metazoa       | Eukaryota | 315  |
|                            | <i>Anopheles gambiae</i>                     |           |               |           |      |
| Aga2                       | <i>str. PEST</i>                             | 333470137 | Metazoa       | Eukaryota | 372  |
| Aae2                       | <i>Aedes aegypti</i>                         | 157167697 | Metazoa       | Eukaryota | 367  |
|                            | <i>Culex</i>                                 |           |               |           |      |
| Cqu1                       | <i>quinquefasciatus</i>                      | 170032456 | Metazoa       | Eukaryota | 560  |
|                            | <i>Naegleria gruberi</i>                     |           |               |           |      |
| Ngr1                       | <i>strain NEG-M</i>                          | 290991005 | Heterolobosea | Eukaryota | 317  |
| Average protein size (aas) |                                              |           |               |           | 385  |
| SD                         |                                              |           |               |           | 90   |
| Cluster 9                  |                                              |           |               |           |      |
| Odi1                       | <i>Oikopleura dioica</i>                     | 313239649 | Metazoa       | Eukaryota | 419  |
| Tsp1                       | <i>Trichinella spiralis</i>                  | 316977368 | Metazoa       | Eukaryota | 430  |
| Average protein size (aas) |                                              |           |               |           | 425  |
| SD                         |                                              |           |               |           | 8    |
| Cluster 10                 |                                              |           |               |           |      |
| Sma1                       | <i>Schistosoma</i><br><i>mansoni</i>         | 256087309 | Metazoa       | Eukaryota | 359  |
|                            | <i>Puccinia graminis</i>                     |           |               |           |      |
|                            | <i>f. sp. tritici CRL 75-</i>                |           |               |           |      |
| Pgr1                       | <i>36-700-3</i>                              | 331237809 | Fungi         | Eukaryota | 276  |
|                            | <i>Melampsora larici-</i>                    |           |               |           |      |
| Mla1                       | <i>populina 98AG31</i>                       | 328855007 | Fungi         | Eukaryota | 302  |
| Average protein size (aas) |                                              |           |               |           | 312  |
| SD                         |                                              |           |               |           | 42   |
| Cluster 11                 |                                              |           |               |           |      |

|      |                                                  |           |       |           |     |
|------|--------------------------------------------------|-----------|-------|-----------|-----|
| Acl1 | <i>Aspergillus clavatus</i> NRRL 1               | 121703123 | Fungi | Eukaryota | 266 |
| Ate1 | <i>Aspergillus terreus</i> NIH2624               | 115388391 | Fungi | Eukaryota | 284 |
| Ani2 | <i>Aspergillus niger</i> CBS 513.88              | 145229229 | Fungi | Eukaryota | 288 |
| Afl1 | <i>Aspergillus flavus</i> NRRL3357               | 238483409 | Fungi | Eukaryota | 284 |
| Ani1 | <i>Aspergillus nidulans</i> FGSC A4              | 67515987  | Fungi | Eukaryota | 284 |
| Tst1 | <i>Talaromyces stipitatus</i> ATCC 10500         | 242804336 | Fungi | Eukaryota | 293 |
| Pch2 | <i>Penicillium chrysogenum</i> Wisconsin 54-1255 | 255951360 | Fungi | Eukaryota | 288 |
| Aca2 | <i>Ajellomyces capsulatus</i> NAm1               | 154280254 | Fungi | Eukaryota | 306 |
| Ade1 | <i>Ajellomyces dermatitidis</i> ER-3             | 239609412 | Fungi | Eukaryota | 297 |
| Cpo1 | <i>Coccidioides posadasii</i> C735 delta SOWgp   | 303323033 | Fungi | Eukaryota | 282 |
| Agy1 | <i>Arthroderma gypseum</i> CBS 118893            | 315044173 | Fungi | Eukaryota | 269 |
| Aot2 | <i>Arthroderma otae</i> CBS 113480               | 296811498 | Fungi | Eukaryota | 275 |
| Lma1 | <i>Leptosphaeria maculans</i>                    | 312214508 | Fungi | Eukaryota | 282 |
| Ptr3 | <i>Pyrenophora tritici-repentis</i> Pt-1C-BFP    | 189202562 | Fungi | Eukaryota | 281 |
| Pno1 | <i>Phaeosphaeria nodorum</i> SN15                | 169596154 | Fungi | Eukaryota | 293 |
| Tme1 | <i>Tuber melanosporum</i> Mel28                  | 296422912 | Fungi | Eukaryota | 375 |
| Aot1 | <i>Arthroderma otae</i> CBS 113480               | 296806035 | Fungi | Eukaryota | 279 |
| Agy2 | <i>Arthroderma gypseum</i> CBS 118893            | 315039707 | Fungi | Eukaryota | 341 |
| Acl2 | <i>Aspergillus clavatus</i> NRRL 1               | 121708480 | Fungi | Eukaryota | 274 |
| Afu2 | <i>Aspergillus fumigatus</i> Af293               | 70992957  | Fungi | Eukaryota | 280 |

|            |                            |           |                 |           |     |
|------------|----------------------------|-----------|-----------------|-----------|-----|
|            | <i>Penicillium</i>         |           |                 |           |     |
|            | <i>chrysogenum</i>         |           |                 |           |     |
| Pch1       | <i>Wisconsin 54-1255</i>   | 255951729 | Fungi           | Eukaryota | 272 |
|            | <i>Aspergillus oryzae</i>  |           |                 |           |     |
| Aor1       | <i>RIB40</i>               | 317137066 | Fungi           | Eukaryota | 272 |
|            | <i>Gibberella zeae</i>     |           |                 |           |     |
| Gze1       | <i>PH-1</i>                | 46125503  | Fungi           | Eukaryota | 304 |
|            | <i>Nectria</i>             |           |                 |           |     |
|            | <i>haematococca</i>        |           |                 |           |     |
| Nha1       | <i>mpVI 77-13-4</i>        | 302910912 | Fungi           | Eukaryota | 274 |
|            | <i>Metarhizium</i>         |           |                 |           |     |
| Mac1       | <i>acridum CQMa 102</i>    | 322701501 | Fungi           | Eukaryota | 281 |
|            | <i>Verticillium albo-</i>  |           |                 |           |     |
| Val1       | <i>atrum VaMs.102</i>      | 302421044 | Fungi           | Eukaryota | 277 |
|            | <i>Glomerella</i>          |           |                 |           |     |
|            | <i>graminicola</i>         |           |                 |           |     |
| Ggr1       | <i>M1.001</i>              | 310792616 | Fungi           | Eukaryota | 278 |
|            | <i>Chaetomium</i>          |           |                 |           |     |
|            | <i>globosum CBS</i>        |           |                 |           |     |
| Cgl1       | <i>148.51</i>              | 116206758 | Fungi           | Eukaryota | 278 |
|            | <i>Neurospora crassa</i>   |           |                 |           |     |
| Ncr1       | <i>OR74A</i>               | 164426091 | Fungi           | Eukaryota | 297 |
|            | <i>Magnaporthe</i>         |           |                 |           |     |
| Mor1       | <i>oryzae 70-15</i>        | 39971505  | Fungi           | Eukaryota | 279 |
|            | <i>Grosmannia</i>          |           |                 |           |     |
| Gcl1       | <i>clavigera kw1407</i>    | 320589073 | Fungi           | Eukaryota | 293 |
|            | <i>Sclerotinia</i>         |           |                 |           |     |
|            | <i>sclerotiorum 1980</i>   |           |                 |           |     |
| Ssc2       | <i>UF-70</i>               | 156041170 | Fungi           | Eukaryota | 281 |
| Bba2       | <i>Beauveria bassiana</i>  | 400602576 | Fungi           | Eukaryota | 281 |
|            | Average protein size (aas) |           |                 |           | 288 |
|            | SD                         |           |                 |           | 21  |
| Cluster 12 |                            |           |                 |           |     |
|            | <i>Thalassiosira</i>       |           |                 |           |     |
|            | <i>pseudonana</i>          |           |                 |           |     |
| Tps1       | <i>CCMP1335</i>            | 224013618 | Bacillariophyta | Eukaryota | 259 |
|            | <i>Thalassiosira</i>       |           |                 |           |     |
|            | <i>pseudonana</i>          |           |                 |           |     |
| Tps2       | <i>CCMP1335</i>            | 224010223 | Bacillariophyta | Eukaryota | 308 |
|            | <i>Ustilago maydis</i>     |           |                 |           |     |
| Uma1       | <i>521</i>                 | 71023203  | Fungi           | Eukaryota | 310 |
|            | <i>Cryptococcus</i>        |           |                 |           |     |
|            | <i>neoformans var.</i>     |           |                 |           |     |
| Cne1       | <i>neoformans JEC21</i>    | 58258347  | Fungi           | Eukaryota | 284 |
| Cga1       | <i>Cryptococcus gattii</i> | 321251307 | Fungi           | Eukaryota | 304 |

| WM276                      |                                                               |           |                   |           |      |
|----------------------------|---------------------------------------------------------------|-----------|-------------------|-----------|------|
| Average protein size (aas) |                                                               |           |                   |           | 293  |
| SD                         |                                                               |           |                   |           | 22   |
| Cluster 13                 |                                                               |           |                   |           |      |
| Odi2                       | <i>Oikopleura dioica</i>                                      | 313233450 | Metazoa           | Eukaryota | 561  |
| Cluster 14                 |                                                               |           |                   |           |      |
| Yli1                       | <i>Yarrowia lipolytica</i><br><i>CLIB122</i>                  | 210075509 | Fungi             | Eukaryota | 250  |
| Ppa2                       | <i>Pichia pastoris</i><br><i>GS115</i>                        | 254568728 | Fungi             | Eukaryota | 311  |
| Zro1                       | <i>Zygosaccharomyces</i><br><i>rouxii</i> CBS 732             | 254581598 | Fungi             | Eukaryota | 266  |
| Cgl2                       | <i>Candida glabrata</i><br><i>CBS 138</i>                     | 50294480  | Fungi             | Eukaryota | 249  |
| Scel                       | <i>Saccharomyces</i><br><i>cerevisiae</i> RM11-1a             | 190406495 | Fungi             | Eukaryota | 260  |
| Vpo1                       | <i>Vanderwaltozyma</i><br><i>polyspora</i> DSM<br>70294       | 156836975 | Fungi             | Eukaryota | 259  |
| Lth1                       | <i>Lachancea</i><br><i>thermotolerans</i><br><i>CBS 6340</i>  | 255710947 | Fungi             | Eukaryota | 249  |
| Kla1                       | <i>Kluyveromyces</i><br><i>lactis</i> NRRL Y-1140             | 50312531  | Fungi             | Eukaryota | 250  |
| Ago1                       | <i>Ashbya gossypii</i><br><i>ATCC 10895</i>                   | 302308260 | Fungi             | Eukaryota | 247  |
| Ppa1                       | <i>Pichia pastoris</i><br><i>GS115</i>                        | 254571885 | Fungi             | Eukaryota | 260  |
| Average protein size (aas) |                                                               |           |                   |           | 260  |
| SD                         |                                                               |           |                   |           | 19   |
| Cluster 15                 |                                                               |           |                   |           |      |
| Pte2                       | <i>Paramecium</i><br><i>tetraurelia</i> strain<br><i>d4-2</i> | 145475843 | Oligohymenophorea | Eukaryota | 246  |
| Pte3                       | <i>Paramecium</i><br><i>tetraurelia</i> strain<br><i>d4-2</i> | 145494574 | Oligohymenophorea | Eukaryota | 274  |
| Pte1                       | <i>Paramecium</i><br><i>tetraurelia</i> strain<br><i>d4-2</i> | 145540144 | Oligohymenophorea | Eukaryota | 252  |
| Tth1                       | <i>Tetrahymena</i><br><i>thermophila</i>                      | 118398647 | Oligohymenophorea | Eukaryota | 267  |
| Aan1                       | <i>Aureococcus</i>                                            | 323453704 | Pelagophyceae     | Eukaryota | 3342 |

|                            |                          |           |                |           |      |
|----------------------------|--------------------------|-----------|----------------|-----------|------|
|                            | <i>anophagefferens</i>   |           |                |           |      |
|                            | <i>Perkinsus marinus</i> |           |                |           |      |
| Pma2                       | ATCC 50983               | 294905260 | Perkinsidae    | Eukaryota | 302  |
|                            | <i>Salpingoeca sp.</i>   |           |                |           |      |
| Ssp1                       | ATCC 50818               | 326433249 | Salpingoecidae | Eukaryota | 332  |
| Average protein size (aas) |                          |           |                |           | 716  |
| SD                         |                          |           |                |           | 1158 |

**Table S2.** 104 MR protein sequences included in this study. Proteins are listed clockwise starting from Cluster 1 (see Fig. S2).

| Abbreviation               | Organism                                 | GenBank Index# | Group               | Domain   | Protein Size |
|----------------------------|------------------------------------------|----------------|---------------------|----------|--------------|
| Cluster 1                  |                                          |                |                     |          |              |
| Hma1                       | <i>Haloarcula marismortui</i> ATCC 43049 | 55378744       | Euryarchaeota       | Archaea  | 250          |
| Hsa3                       | <i>Halobacterium salinarum</i>           | 11992133       | Euryarchaeota       | Archaea  | 255          |
| Hsa1                       | <i>Halobacterium salinarum</i>           | 46015682       | Euryarchaeota       | Archaea  | 227          |
| Hva2                       | <i>Haloarcula vallismortis</i>           | 2829812        | Euryarchaeota       | Archaea  | 250          |
| Hwa2                       | <i>Haloquadratum walsbyi</i> DSM 16790   | 110666993      | Euryarchaeota       | Archaea  | 246          |
| Rxy1                       | <i>Rubrobacter xylanophilus</i> DSM 9941 | 108804857      | Actinobacteria      | Bacteria | 239          |
| Kra1                       | <i>Ktedonobacter racemifer</i> DSM 44963 | 298250763      | Chloroflexi         | Bacteria | 242          |
| Ssp2                       | <i>Sphingomonas sp. S17</i>              | 332185638      | Alphaproteobacteria | Bacteria | 234          |
| Psp2                       | <i>Pantoea sp. aB</i>                    | 304398913      | Gammaproteobacteria | Bacteria | 237          |
| Msp1                       | <i>Methylobacterium sp. 4-46</i>         | 170738878      | Alphaproteobacteria | Bacteria | 252          |
| Average protein size (aas) |                                          |                |                     |          | 243          |
| SD                         |                                          |                |                     |          | 9            |
| Cluster 2                  |                                          |                |                     |          |              |
| Hsp1                       | <i>Halobacterium sp. SG1</i>             | 461609         | Euryarchaeota       | Archaea  | 284          |

|           |                                                   |           |               |          |     |
|-----------|---------------------------------------------------|-----------|---------------|----------|-----|
| Hva3      | <i>Haloarcula<br/>vallismortis</i>                | 2829811   | Euryarchaeota | Archaea  | 276 |
| Nph2      | <i>Natronomonas<br/>pharaonis</i>                 | 114809    | Euryarchaeota | Archaea  | 291 |
| Sru2      | <i>Salinibacter ruber<br/>DSM 13855</i>           | 83814666  | Bacteroidetes | Bacteria | 249 |
| Hsa2      | <i>Halobacterium<br/>salinarum</i>                | 8569313   | Euryarchaeota | Archaea  | 253 |
| Hwa1      | <i>Haloquadratum<br/>walsbyi DSM 16790</i>        | 110668951 | Euryarchaeota | Archaea  | 292 |
| Hsp5      | <i>Haloterrigena sp.<br/>arg-4</i>                | 14194474  | Euryarchaeota | Archaea  | 297 |
| Nma1      | <i>Natrialba magadii<br/>ATCC 43099</i>           | 289582237 | Euryarchaeota | Archaea  | 279 |
|           | Average protein size (aas)                        |           |               |          | 278 |
|           | SD                                                |           |               |          | 18  |
| Cluster 3 |                                                   |           |               |          |     |
| Hmu1      | <i>Halomicrobium<br/>mukohataei DSM<br/>12286</i> | 257388720 | Euryarchaeota | Archaea  | 243 |
| Hma3      | <i>Haloarcula<br/>marismortui ATCC<br/>43049</i>  | 55376955  | Euryarchaeota | Archaea  | 236 |
| Nph1      | <i>Natronomonas<br/>pharaonis</i>                 | 1168615   | Euryarchaeota | Archaea  | 239 |
| Hsp4      | <i>Halobacterium sp.<br/>AUS-1</i>                | 19716034  | Euryarchaeota | Archaea  | 249 |
| Hsp6      | <i>Halobacterium sp.<br/>NRC-1</i>                | 15790684  | Euryarchaeota | Archaea  | 237 |
| Hsp2      | <i>Halobacterium sp.</i>                          | 15790610  | Euryarchaeota | Archaea  | 239 |



|           |                            |           |               |           |      |
|-----------|----------------------------|-----------|---------------|-----------|------|
|           | <i>NRC-1</i>               |           |               |           |      |
|           | <i>Halobacterium sp.</i>   |           |               |           |      |
| Hsp3      | <i>SG1</i>                 | 461613    | Euryarchaeota | Archaea   | 247  |
|           | <i>Haloarcula</i>          |           |               |           |      |
| Hva1      | <i>vallismortis</i>        | 2499388   | Euryarchaeota | Archaea   | 236  |
|           | <i>Salinibacter ruber</i>  |           |               |           |      |
| Sru1      | <i>DSM 13855</i>           | 83815419  | Bacteroidetes | Bacteria  | 235  |
|           | <i>Salinibacter ruber</i>  |           |               |           |      |
| Sru4      | <i>DSM 13855</i>           | 83814238  | Bacteroidetes | Bacteria  | 239  |
|           | Average protein size (aas) |           |               |           | 240  |
|           | SD                         |           |               |           | 5    |
| Cluster 4 |                            |           |               |           |      |
|           | <i>Haloarcula</i>          |           |               |           |      |
|           | <i>marismortui ATCC</i>    |           |               |           |      |
| Hma2      | <i>43049</i>               | 55377431  | Euryarchaeota | Archaea   | 232  |
|           | <i>Volvox carteri f.</i>   |           |               |           |      |
| Vca1      | <i>nagariensis</i>         | 302844819 | Viridiplantae | Eukaryota | 1788 |
|           | Average protein size (aas) |           |               |           | 1010 |
|           | SD                         |           |               |           | 1100 |
| Cluster 5 |                            |           |               |           |      |
|           | <i>Leptosphaeria</i>       |           |               |           |      |
| Lma1      | <i>maculans</i>            | 312215142 | Fungi         | Eukaryota | 304  |
|           | <i>Oryza sativa Indica</i> |           |               |           |      |
| Osa1      | <i>Group</i>               | 34559256  | Viridiplantae | Eukaryota | 320  |
|           | <i>Botryotinia</i>         |           |               |           |      |
| Bfu1      | <i>fuckeliana B05.10</i>   | 154319009 | Fungi         | Eukaryota | 312  |
|           | <i>Sordaria</i>            |           |               |           |      |
| Sma1      | <i>macrospora</i>          | 289618890 | Fungi         | Eukaryota | 307  |
| Cgl1      | <i>Chaetomium</i>          | 116204249 | Fungi         | Eukaryota | 301  |

|           |                                                               |           |       |           |     |
|-----------|---------------------------------------------------------------|-----------|-------|-----------|-----|
|           | <i>globosum</i> CBS<br>148.51                                 |           |       |           |     |
| Gfu2      | <i>Gibberella fujikuroi</i>                                   | 209408529 | Fungi | Eukaryota | 293 |
| Ani1      | <i>Aspergillus niger</i><br>CBS 513.88                        | 145245968 | Fungi | Eukaryota | 305 |
| Afu1      | <i>Aspergillus</i><br><i>fumigatus</i> Af293                  | 70982522  | Fungi | Eukaryota | 304 |
| Pch1      | <i>Penicillium</i><br><i>chrysogenum</i><br>Wisconsin 54-1255 | 255955269 | Fungi | Eukaryota | 301 |
| Ani2      | <i>Aspergillus nidulans</i><br>FGSC A4                        | 259485658 | Fungi | Eukaryota | 352 |
| Tst1      | <i>Talaromyces</i><br><i>stipitatus</i> ATCC<br>10500         | 242780133 | Fungi | Eukaryota | 250 |
| Aca1      | <i>Ajellomyces</i><br><i>capsulatus</i> NAm1                  | 154272003 | Fungi | Eukaryota | 298 |
| Cpo1      | <i>Coccidioides</i><br><i>posadasii</i>                       | 13924710  | Fungi | Eukaryota | 289 |
| Agy1      | <i>Arthroderma</i><br><i>gypseum</i> CBS<br>118893            | 315041787 | Fungi | Eukaryota | 286 |
|           | Average protein size (aas)                                    |           |       |           | 302 |
|           | SD                                                            |           |       |           | 22  |
| Cluster 6 |                                                               |           |       |           |     |
| Sre1      | <i>Sporisorium</i><br><i>reilianum</i>                        | 323507933 | Fungi | Eukaryota | 292 |
| Mla1      | <i>Melampsora larici-</i><br><i>populina</i> 98AG31           | 328851545 | Fungi | Eukaryota | 287 |
| Mos1      | <i>Mixia osmundae</i>                                         | 358059197 | Fungi | Eukaryota | 323 |

|                            |  |  |  |  |     |
|----------------------------|--|--|--|--|-----|
| Average protein size (aas) |  |  |  |  | 290 |
| SD                         |  |  |  |  | 4   |

Cluster 7

|                            |                            |           |                    |           |     |
|----------------------------|----------------------------|-----------|--------------------|-----------|-----|
| Cpa1                       | <i>Cyanophora paradoxa</i> | 256681420 | Glaucocestophyceae | Eukaryota | 334 |
| Cpa2                       | <i>Cyanophora paradoxa</i> | 268376501 | Glaucocestophyceae | Eukaryota | 282 |
| Average protein size (aas) |                            |           |                    |           | 308 |
| SD                         |                            |           |                    |           | 37  |

Cluster 8

|      |                                                             |           |       |           |     |
|------|-------------------------------------------------------------|-----------|-------|-----------|-----|
| Cne1 | <i>Cryptococcus neoformans</i> var. <i>neoformans JEC21</i> | 58269234  | Fungi | Eukaryota | 328 |
| Cga1 | <i>Cryptococcus gattii</i> WM276                            | 321261457 | Fungi | Eukaryota | 328 |

Cluster 9

|      |                                         |           |       |           |     |
|------|-----------------------------------------|-----------|-------|-----------|-----|
| Lma2 | <i>Leptosphaeria maculans</i>           | 312215043 | Fungi | Eukaryota | 303 |
| Bor1 | <i>Bipolaris oryzae</i>                 | 224809196 | Fungi | Eukaryota | 306 |
| Gfu1 | <i>Gibberella fujikuroi</i>             | 39725407  | Fungi | Eukaryota | 307 |
| Gze1 | <i>Gibberella zeae</i> PH-1             | 46114444  | Fungi | Eukaryota | 407 |
| Bfu2 | <i>Botryotinia fuckeliana</i> B05.10    | 154293534 | Fungi | Eukaryota | 338 |
| Ggr1 | <i>Glomerella graminicola</i> MI.001    | 310801701 | Fungi | Eukaryota | 293 |
| Val1 | <i>Verticillium albo-atrum</i> VaMs.102 | 302420879 | Fungi | Eukaryota | 253 |

|                            |                                                     |           |               |           |     |
|----------------------------|-----------------------------------------------------|-----------|---------------|-----------|-----|
| Mor1                       | <i>Magnaporthe oryzae</i><br>70-15                  | 39955533  | Fungi         | Eukaryota | 286 |
| Mla2                       | <i>Melampsora larici-</i><br><i>populina</i> 98AG31 | 328851478 | Fungi         | Eukaryota | 295 |
| Uma2                       | <i>Ustilago maydis</i> 521                          | 71015109  | Fungi         | Eukaryota | 335 |
| Uma1                       | <i>Ustilago maydis</i> 521                          | 71020083  | Fungi         | Eukaryota | 334 |
| Agy2                       | <i>Arthroderma</i><br><i>gypseum</i> CBS<br>118893  | 315045588 | Fungi         | Eukaryota | 267 |
| Aot1                       | <i>Arthroderma otae</i><br>CBS 113480               | 296805307 | Fungi         | Eukaryota | 291 |
| Aac1                       | <i>Acetabularia</i><br><i>acetabulum</i>            | 67906884  | Viridiplantae | Eukaryota | 279 |
| Average protein size (aas) |                                                     |           |               |           | 308 |
| SD                         |                                                     |           |               |           | 38  |
| Cluster 10                 |                                                     |           |               |           |     |
| Csp2                       | <i>Cryptomonas sp.</i> S2                           | 74476774  | Cryptophyta   | Eukaryota | 261 |
| Gth2                       | <i>Guillardia theta</i>                             | 74476770  | Cryptophyta   | Eukaryota | 249 |
| Gth1                       | <i>Guillardia theta</i>                             | 74476772  | Cryptophyta   | Eukaryota | 254 |
| Average protein size (aas) |                                                     |           |               |           | 255 |
| SD                         |                                                     |           |               |           | 6   |
| Cluster 11                 |                                                     |           |               |           |     |
| Oma2                       | <i>Oxyrrhis marina</i>                              | 324096620 | Dinophyceae   | Eukaryota | 252 |
| Oma3                       | <i>Oxyrrhis marina</i>                              | 327335365 | Dinophyceae   | Eukaryota | 257 |
| Average protein size (aas) |                                                     |           |               |           | 255 |
| SD                         |                                                     |           |               |           | 4   |
| Cluster 12                 |                                                     |           |               |           |     |
| Fba1                       | <i>Flavobacteria</i>                                | 225011679 | Bacteroidetes | Bacteria  | 241 |

|       |                                                                         |           |                     |          |     |
|-------|-------------------------------------------------------------------------|-----------|---------------------|----------|-----|
|       | <i>bacterium MS024-2A</i>                                               |           |                     |          |     |
|       | <i>Dokdonia donghaensis uncultured</i>                                  |           |                     |          |     |
| Ddo1  |                                                                         | 223452819 | Bacteroidetes       | Bacteria | 246 |
| Orf1  | <i>bacterium Spirosoma linguale DSM 74</i>                              | 47779419  | none                | Bacteria | 254 |
| Sli1  |                                                                         | 284036559 | Bacteroidetes       | Bacteria | 250 |
| Mtr1  | <i>Marivirga tractuosa DSM 4126</i>                                     | 313676873 | Bacteroidetes       | Bacteria | 252 |
| Hhy1  | <i>Haliscomenobacter hydrossis DSM 1100 uncultured marine bacterium</i> | 332663718 | Bacteroidetes       | Bacteria | 249 |
| Orf4  | <i>HF10_19P19 uncultured marine bacterium</i>                           | 119094158 | none                | Bacteria | 257 |
| Orf24 | <i>HF10_25F10 uncultured bacterium</i>                                  | 119094185 | none                | Bacteria | 258 |
| Orf11 | <i>bacterium</i>                                                        | 67483490  | none                | Bacteria | 256 |
| Vca2  | <i>Vibrio campbellii uncultured</i>                                     | 289157785 | Gammaproteobacteria | Bacteria | 271 |
| Orf19 | <i>bacterium marine gamma proteobacterium</i>                           | 29470278  | none                | Bacteria | 254 |
| Orf20 | <i>HTCC2143 uncultured</i>                                              | 119476620 | Gammaproteobacteria | Bacteria | 229 |
| Orf10 | <i>bacterium uncultured marine gamma</i>                                | 67906596  | none                | Bacteria | 257 |
| Orf6  | <i>proteobacterium</i>                                                  | 45644626  | Gammaproteobacteria | Bacteria | 248 |

|       |                            |           |                     |              |     |
|-------|----------------------------|-----------|---------------------|--------------|-----|
|       | <i>EBAC20E09</i>           |           |                     |              |     |
|       | <i>Photobacterium sp.</i>  |           |                     |              |     |
| Psp1  | <i>SKA34</i>               | 89074634  | Gammaproteobacteria | Bacteria     | 230 |
|       | <i>uncultured</i>          |           |                     |              |     |
| Orf8  | <i>bacterium</i>           | 13560725  | none                | Bacteria     | 252 |
|       | <i>uncultured marine</i>   |           |                     |              |     |
|       | <i>group II</i>            |           |                     |              |     |
|       | <i>euryarchaeote</i>       |           |                     |              |     |
| Ieu1  | <i>HF70_59C08</i>          | 77024964  | Euryarchaeota       | Archaea      | 280 |
|       | <i>uncultured organism</i> |           |                     |              |     |
| Orf23 | <i>HF10_3D09</i>           | 82548293  | none                | Unclassified | 278 |
|       | <i>Exiguobacterium</i>     |           |                     |              |     |
| Esi1  | <i>sibiricum 255-15</i>    | 172057442 | Firmicutes          | Bacteria     | 252 |
|       | <i>Thioalkalimicrobium</i> |           |                     |              |     |
| Tcy1  | <i>cyclicum ALM1</i>       | 334144590 | Gammaproteobacteria | Bacteria     | 249 |
|       | <i>alpha</i>               |           |                     |              |     |
|       | <i>proteobacterium</i>     |           |                     |              |     |
| Orf26 | <i>BAL199</i>              | 163795412 | Alphaproteobacteria | Bacteria     | 255 |
|       | <i>Octadecabacter</i>      |           |                     |              |     |
| Oan1  | <i>antarcticus 238</i>     | 254449583 | Alphaproteobacteria | Bacteria     | 257 |
|       | <i>Oxalobacteraceae</i>    |           |                     |              |     |
|       | <i>bacterium</i>           |           |                     |              |     |
| Oba1  | <i>IMCC9480</i>            | 329904644 | Betaproteobacteria  | Bacteria     | 257 |
|       | <i>beta</i>                |           |                     |              |     |
|       | <i>proteobacterium</i>     |           |                     |              |     |
| Orf27 | <i>KB13</i>                | 254468407 | Betaproteobacteria  | Bacteria     | 249 |
|       | <i>Marinobacter sp.</i>    |           |                     |              |     |
| Msp2  | <i>ELB17</i>               | 126666904 | Gammaproteobacteria | Bacteria     | 274 |
| Oma1  | <i>Oxyrrhis marina</i>     | 157093545 | Dinophyceae         | Eukaryota    | 262 |
|       | <i>Gloeobacter</i>         |           |                     |              |     |
| Gvi1  | <i>violaceus PCC 7421</i>  | 37519767  | Cyanobacteria       | Bacteria     | 298 |

|                            |                                                            |           |                         |           |     |
|----------------------------|------------------------------------------------------------|-----------|-------------------------|-----------|-----|
| Orf22                      | <i>actinobacterium</i><br><i>MWH-EgelM2-3.D6</i>           | 224384116 | Actinobacteria          | Bacteria  | 251 |
| Orf28                      | <i>actinobacterium</i><br><i>MWH-Uga1</i>                  | 224384108 | Actinobacteria          | Bacteria  | 263 |
| Sru3                       | <i>Salinibacter ruber</i><br><i>DSM 13855</i>              | 83815260  | Bacteroidetes           | Bacteria  | 273 |
| Ipa1                       | <i>Isosphaera pallida</i><br><i>ATCC 43644</i>             | 320105020 | Planctomycetes          | Bacteria  | 308 |
| Average protein size (aas) |                                                            |           |                         |           | 258 |
| SD                         |                                                            |           |                         |           | 17  |
| Cluster 13                 |                                                            |           |                         |           |     |
| Ssp1                       | <i>Salpingoeca sp.</i><br><i>ATCC 50818</i>                | 326433484 | Salpingoecidae          | Eukaryota | 704 |
| Cluster 14                 |                                                            |           |                         |           |     |
| Csp1                       | <i>Cyanothece sp. PCC</i><br><i>7425</i>                   | 220908815 | Cyanobacteria           | Bacteria  | 233 |
| Tra1                       | <i>Truepera</i><br><i>radiovictrix DSM</i><br><i>17093</i> | 297625115 | Deinococcus-<br>Thermus | Bacteria  | 251 |
| Csp3                       | <i>Cyanothece sp. PCC</i><br><i>7424</i>                   | 218440842 | Cyanobacteria           | Bacteria  | 264 |
| Csp4                       | <i>Cyanothece sp. PCC</i><br><i>7425</i>                   | 220906310 | Cyanobacteria           | Bacteria  | 233 |
| Average protein size (aas) |                                                            |           |                         |           | 245 |
| SD                         |                                                            |           |                         |           | 15  |

**Table S3.** 134 NiCoT protein sequences included in this study. Proteins are listed clockwise starting from Cluster 1 (see Fig. S3).

| <b>Abbreviation</b>        | <b>Organism</b>                          | <b>GenBank Index#</b> | <b>Group</b>        | <b>Domain</b> | <b>Protein Size</b> |
|----------------------------|------------------------------------------|-----------------------|---------------------|---------------|---------------------|
| Cluster 1                  |                                          |                       |                     |               |                     |
| Tuz1                       | <i>Thermoproteus uzoniensis</i> 768-20   | 327312060             | Crenarchaeota       | Archaea       | 354                 |
| Sac1                       | <i>Sulfolobus acidocaldarius</i> DSM 639 | 70607747              | Crenarchaeota       | Archaea       | 355                 |
| Sis1                       | <i>Sulfolobus islandicus</i> Y.N.15.51   | 229583039             | Crenarchaeota       | Archaea       | 322                 |
| Mcu1                       | <i>Metallosphaera cuprina</i> Ar-4       | 330834936             | Crenarchaeota       | Archaea       | 342                 |
| Vdi1                       | <i>Vulcanisaeta distributa</i> DSM 14429 | 307596423             | Crenarchaeota       | Archaea       | 371                 |
| Sso1                       | <i>Sulfolobus solfataricus</i> P2        | 15897886              | Crenarchaeota       | Archaea       | 373                 |
| Sto1                       | <i>Sulfolobus tokodaii</i> str. 7        | 15922775              | Crenarchaeota       | Archaea       | 383                 |
| Mse1                       | <i>Metallosphaera sedula</i> DSM 5348    | 146304071             | Crenarchaeota       | Archaea       | 347                 |
| Tac1                       | <i>Thermoplasma acidophilum</i> DSM 1728 | 16082181              | Euryarchaeota       | Archaea       | 347                 |
| Mbo1                       | <i>Methanoregula boonei</i> 6A8          | 154150518             | Euryarchaeota       | Archaea       | 363                 |
| Hma1                       | <i>Hippea maritima</i> DSM 10411         | 327399247             | Deltaproteobacteria | Bacteria      | 337                 |
| Hsp1                       | <i>Hydrogenobaculum</i> sp. Y04AAS1      | 195953769             | Aquificae           | Bacteria      | 340                 |
| Average protein size (aas) |                                          |                       |                     |               | 353                 |



|           |                                                                                                    |           |                    |          |     |
|-----------|----------------------------------------------------------------------------------------------------|-----------|--------------------|----------|-----|
| SD        |                                                                                                    |           |                    |          | 17  |
| Cluster 2 |                                                                                                    |           |                    |          |     |
| Nfa1      | <i>Nocardia farcinica</i><br><i>IFM 10152</i>                                                      | 54022189  | Actinobacteria     | Bacteria | 355 |
| Rer1      | <i>Rhodococcus</i><br><i>erythropolis PR4</i>                                                      | 226308167 | Actinobacteria     | Bacteria | 373 |
| Pdi1      | <i>Pseudonocardia</i><br><i>dioxanivorans</i><br><i>CB1190</i>                                     | 331696152 | Actinobacteria     | Bacteria | 373 |
| Nba1      | <i>Nocardioidaceae</i><br><i>bacterium Broad-1</i><br><i>Gordonia</i><br><i>neofelifaecis NRRL</i> | 326331536 | Actinobacteria     | Bacteria | 368 |
| Gne1      | <i>B-59395</i>                                                                                     | 326384692 | Actinobacteria     | Bacteria | 386 |
| Fsp1      | <i>Frankia sp. Eu11c</i>                                                                           | 312195744 | Actinobacteria     | Bacteria | 394 |
| Sav1      | <i>Streptomyces</i><br><i>avermitilis MA-4680</i>                                                  | 29827101  | Actinobacteria     | Bacteria | 381 |
| Cac1      | <i>Catenulispora</i><br><i>acidiphila DSM</i><br><i>44928</i>                                      | 256394330 | Actinobacteria     | Bacteria | 388 |
| Kse1      | <i>Kitasatospora setae</i><br><i>KM-6054</i>                                                       | 311895361 | Actinobacteria     | Bacteria | 363 |
| Ssp3      | <i>Streptomyces sp. AA4</i>                                                                        | 302530834 | Actinobacteria     | Bacteria | 364 |
| Fsp2      | <i>Frankia sp. CcI3</i>                                                                            | 86739760  | Actinobacteria     | Bacteria | 374 |
| Mtu1      | <i>Mycobacterium</i><br><i>tuberculosis H37Rv</i>                                                  | 15609993  | Actinobacteria     | Bacteria | 372 |
| Sav2      | <i>Streptomyces</i><br><i>avermitilis MA-4680</i>                                                  | 29828875  | Actinobacteria     | Bacteria | 377 |
| Ssp1      | <i>Streptomyces sp. AA4</i>                                                                        | 302527431 | Actinobacteria     | Bacteria | 377 |
| Bdo1      | <i>Burkholderia dolosa</i>                                                                         | 254255317 | Betaproteobacteria | Bacteria | 380 |

|           |                                                                                               |           |                    |          |     |
|-----------|-----------------------------------------------------------------------------------------------|-----------|--------------------|----------|-----|
|           | <i>AUO158</i>                                                                                 |           |                    |          |     |
| Bsp3      | <i>Burkholderia sp.</i><br><i>Ch1-1</i>                                                       | 296156247 | Betaproteobacteria | Bacteria | 379 |
| Bsp1      | <i>Burkholderia sp.</i><br><i>CCGE1002</i>                                                    | 295700941 | Betaproteobacteria | Bacteria | 377 |
| Dsp1      | <i>Dermaococcus sp.</i><br><i>Ellin185</i>                                                    | 309810442 | Actinobacteria     | Bacteria | 366 |
| Pdi2      | <i>Pseudonocardia</i><br><i>dioxanivorans</i><br><i>CB1190</i>                                | 327309912 | Actinobacteria     | Bacteria | 384 |
| Kra1      | <i>Kineococcus</i><br><i>radiotolerans</i><br><i>SRS30216</i>                                 | 152967021 | Actinobacteria     | Bacteria | 365 |
| Nsp1      | <i>Nocardioides sp.</i><br><i>JS614</i>                                                       | 119716355 | Actinobacteria     | Bacteria | 347 |
|           | Average protein size (aas)                                                                    |           |                    |          | 373 |
|           | SD                                                                                            |           |                    |          | 11  |
| Cluster 3 |                                                                                               |           |                    |          |     |
| Msp1      | <i>Micromonospora sp.</i><br><i>ATCC 39149</i>                                                | 238059430 | Actinobacteria     | Bacteria | 387 |
| Rjo1      | <i>Rhodococcus jostii</i><br><i>RHA1</i>                                                      | 111026242 | Actinobacteria     | Bacteria | 364 |
| Rrh1      | <i>Rhodococcus</i><br><i>rhodochrous</i><br><i>Saccharopolyspora</i><br><i>erythraea NRRL</i> | 1850787   | Actinobacteria     | Bacteria | 352 |
| Ser1      | <i>2338</i><br><i>Thiomonas</i>                                                               | 134102404 | Actinobacteria     | Bacteria | 386 |
| Tin1      | <i>intermedia K12</i>                                                                         | 296137491 | Betaproteobacteria | Bacteria | 384 |
|           | Average protein size (aas)                                                                    |           |                    |          | 375 |

|                            |                                                                            |           |                         |          |     |
|----------------------------|----------------------------------------------------------------------------|-----------|-------------------------|----------|-----|
| SD                         |                                                                            |           |                         |          | 16  |
| Cluster 4                  |                                                                            |           |                         |          |     |
| Dge1                       | <i>Deinococcus<br/>geothermalis DSM<br/>11300</i>                          | 94971822  | Deinococcus-<br>Thermus | Bacteria | 336 |
| Cluster 5                  |                                                                            |           |                         |          |     |
| Sru1                       | <i>Segniliparus rugosus<br/>ATCC BAA-974</i>                               | 317507819 | Actinobacteria          | Bacteria | 279 |
| Sro1                       | <i>Segniliparus<br/>rotundus DSM 44985</i>                                 | 296392871 | Actinobacteria          | Bacteria | 273 |
| Fph1                       | <i>Francisella<br/>philomiragia subsp.<br/>philomiragia ATCC<br/>25017</i> | 167627043 | Gammaproteobacteria     | Bacteria | 309 |
| Average protein size (aas) |                                                                            |           |                         |          | 287 |
| SD                         |                                                                            |           |                         |          | 19  |
| Cluster 6                  |                                                                            |           |                         |          |     |
| Mlu1                       | <i>Micrococcus luteus<br/>NCTC 2665</i>                                    | 239916896 | Actinobacteria          | Bacteria | 352 |
| Krh1                       | <i>Kocuria rhizophila<br/>DC2201</i>                                       | 184201812 | Actinobacteria          | Bacteria | 347 |
| Aau1                       | <i>Arthrobacter<br/>aureus TC1</i>                                         | 119963145 | Actinobacteria          | Bacteria | 348 |
| Mph1                       | <i>Micrococcus<br/>phosphovorans NM-1</i>                                  | 334688213 | Actinobacteria          | Bacteria | 386 |
| Aur1                       | <i>Actinomyces<br/>urogenitalis DSM<br/>15434</i>                          | 227497026 | Actinobacteria          | Bacteria | 319 |

|                            |     |
|----------------------------|-----|
| Average protein size (aas) | 350 |
| SD                         | 24  |

Cluster 7

|                            |                                                                      |           |                         |           |     |
|----------------------------|----------------------------------------------------------------------|-----------|-------------------------|-----------|-----|
| Aan1                       | <i>Aureococcus anophagefferens</i>                                   | 323450558 | Pelagophyceae           | Eukaryota | 354 |
| Taq1                       | <i>Thermus aquaticus Y51MC23</i>                                     | 218295416 | Deinococcus-<br>Thermus | Bacteria  | 220 |
| Dma1                       | <i>Deinococcus maricopenensis DSM 21211</i>                          | 320332818 | Deinococcus-<br>Thermus | Bacteria  | 226 |
| Cme1                       | <i>Cupriavidus metallidurans CH34</i>                                | 94310475  | Betaproteobacteria      | Bacteria  | 278 |
| Dar1                       | <i>Dechloromonas aromatica RCB</i>                                   | 71909556  | Betaproteobacteria      | Bacteria  | 269 |
| Sli1                       | <i>Sideroxydans lithotrophicus ES-1</i>                              | 291614874 | Betaproteobacteria      | Bacteria  | 271 |
| Lpn1                       | <i>Legionella pneumophila subsp. pneumophila str. Philadelphia 1</i> | 52842685  | Gammaproteobacteria     | Bacteria  | 255 |
| Llo1                       | <i>Legionella longbeachae D-4968</i>                                 | 270159427 | Gammaproteobacteria     | Bacteria  | 226 |
| Bme1                       | <i>Bacillus megaterium QM B1551</i>                                  | 294497143 | Firmicutes              | Bacteria  | 265 |
| Nde1                       | <i>Candidatus Nitrospira defluvii</i>                                | 302037429 | Nitrospirae             | Bacteria  | 267 |
| Average protein size (aas) | 263                                                                  |           |                         |           |     |
| SD                         | 38                                                                   |           |                         |           |     |

Cluster 8

|      |                                                                                        |           |                       |          |     |
|------|----------------------------------------------------------------------------------------|-----------|-----------------------|----------|-----|
| Lci1 | <i>Leuconostoc citreum</i><br>KM20                                                     | 170017836 | Firmicutes            | Bacteria | 341 |
| Lme1 | <i>Leuconostoc</i><br><i>mesenteroides</i> subsp.<br><i>mesenteroides</i> ATCC<br>8293 | 116619095 | Firmicutes            | Bacteria | 341 |
| Lbr1 | <i>Lactobacillus brevis</i><br>subsp. <i>gravesensis</i><br>ATCC 27305                 | 227508031 | Firmicutes            | Bacteria | 359 |
| Bce1 | <i>Bacillus cereus</i><br>ATCC 10987                                                   | 42782706  | Firmicutes            | Bacteria | 328 |
| Hmu1 | <i>Helicobacter</i><br><i>mustelae</i> 12198                                           | 291276463 | Epsilonproteobacteria | Bacteria | 330 |
| Hpy1 | <i>Helicobacter pylori</i><br>732734                                                   | 732734    | Epsilonproteobacteria | Bacteria | 308 |
| Hfe1 | <i>Helicobacter felis</i><br>ATCC 49179                                                | 315453608 | Epsilonproteobacteria | Bacteria | 342 |
| Sps1 | <i>Staphylococcus</i><br><i>pseudintermedius</i><br>HKU10-03                           | 319893531 | Firmicutes            | Bacteria | 336 |
| Sau1 | <i>Staphylococcus</i><br><i>aureus</i> subsp. <i>aureus</i><br>COL                     | 57651089  | Firmicutes            | Bacteria | 350 |
| Btu1 | <i>Bacillus tusciae</i> DSM<br>2912                                                    | 295697080 | Firmicutes            | Bacteria | 339 |
| Dni1 | <i>Desulfotomaculum</i><br><i>nigrificans</i> DSM 574                                  | 323702331 | Firmicutes            | Bacteria | 343 |
| Ppe1 | <i>Pediococcus</i><br><i>pentosaceus</i> ATCC<br>25745                                 | 116493424 | Firmicutes            | Bacteria | 335 |
| Lfe1 | <i>Lactobacillus</i><br><i>fermentum</i> IFO 3956                                      | 184156204 | Firmicutes            | Bacteria | 337 |

|           |                                                                      |           |                |           |      |
|-----------|----------------------------------------------------------------------|-----------|----------------|-----------|------|
| Lbr2      | <i>Lactobacillus brevis</i><br>ATCC 367                              | 116334421 | Firmicutes     | Bacteria  | 327  |
| Blo1      | <i>Bifidobacterium longum subsp. infantis</i> ATCC 15697             | 213691030 | Actinobacteria | Bacteria  | 324  |
|           | Average protein size (aas)                                           |           |                |           | 336  |
|           | SD                                                                   |           |                |           | 12   |
| Cluster 9 |                                                                      |           |                |           |      |
| Ate1      | <i>Aspergillus terreus</i><br>NIH2624                                | 115443076 | Fungi          | Eukaryota | 1044 |
| Afl1      | <i>Aspergillus flavus</i><br>NRRL3357                                | 238493689 | Fungi          | Eukaryota | 439  |
| Ani1      | <i>Aspergillus niger</i><br><i>Aspergillus</i>                       | 134080234 | Fungi          | Eukaryota | 443  |
| Afu1      | <i>fumigatus</i> Af293<br><i>Penicillium</i>                         | 71001072  | Fungi          | Eukaryota | 474  |
| Pch1      | <i>chrysogenum</i><br><i>Wisconsin 54-1255</i><br><i>Talaromyces</i> | 255935567 | Fungi          | Eukaryota | 475  |
| Tst1      | <i>stipitatus</i> ATCC<br>10500<br><i>Trichophyton</i>               | 242776711 | Fungi          | Eukaryota | 501  |
| Tve1      | <i>verrucosum</i> HKI<br>0517<br><i>Arthroderma</i>                  | 302654098 | Fungi          | Eukaryota | 438  |
| Agy1      | <i>gypseum</i> CBS<br>118893<br><i>Coccidioides</i>                  | 315050476 | Fungi          | Eukaryota | 474  |
| Cpo1      | <i>posadasii</i> C735 delta<br>SOWgp                                 | 303312513 | Fungi          | Eukaryota | 370  |

|      |                                               |           |       |           |     |
|------|-----------------------------------------------|-----------|-------|-----------|-----|
| Aca2 | <i>Ajellomyces capsulatus G186AR</i>          | 225559374 | Fungi | Eukaryota | 520 |
| Pbr1 | <i>Paracoccidioides brasiliensis Pb03</i>     | 225684226 | Fungi | Eukaryota | 585 |
| Lma1 | <i>Leptosphaeria maculans</i>                 | 312217298 | Fungi | Eukaryota | 428 |
| Ggr1 | <i>Glomerella graminicola M1.001</i>          | 310801087 | Fungi | Eukaryota | 414 |
| Mor1 | <i>Magnaporthe oryzae 70-15</i>               | 39941184  | Fungi | Eukaryota | 381 |
| Val1 | <i>Verticillium albo-atrum VaMs.102</i>       | 302417100 | Fungi | Eukaryota | 373 |
| Gze1 | <i>Gibberella zeae PH-1</i>                   | 46124271  | Fungi | Eukaryota | 409 |
| Man1 | <i>Metarhizium anisopliae ARSEF 23</i>        | 322705897 | Fungi | Eukaryota | 423 |
| Gcl1 | <i>Grosmannia clavigera kw1407</i>            | 320587863 | Fungi | Eukaryota | 427 |
| Pan1 | <i>Podospora anserina S mat+</i>              | 171685454 | Fungi | Eukaryota | 415 |
| Sma1 | <i>Sordaria macrospora Tuber melanosporum</i> | 289617779 | Fungi | Eukaryota | 414 |
| Tme1 | <i>Mel28 Magnaporthe oryzae 70-15</i>         | 296420530 | Fungi | Eukaryota | 436 |
| Mor2 | <i>Schizosaccharomyces japonicus yFS275</i>   | 145609405 | Fungi | Eukaryota | 613 |
| Sja2 | <i>Schizosaccharomyces pombe 972h-</i>        | 213410268 | Fungi | Eukaryota | 405 |
| Spo1 | <i>Schizophyllum commune H4-8</i>             | 63054407  | Fungi | Eukaryota | 405 |
| Sco1 |                                               | 302680430 | Fungi | Eukaryota | 486 |

|                            |                                                                                                       |           |                     |           |     |
|----------------------------|-------------------------------------------------------------------------------------------------------|-----------|---------------------|-----------|-----|
| Lbi1                       | <i>Laccaria bicolor</i><br><i>S238N-H82</i>                                                           | 170100699 | Fungi               | Eukaryota | 418 |
| Cne1                       | <i>Cryptococcus</i><br><i>neoformans</i> var.<br><i>neoformans JEC21</i>                              | 58262844  | Fungi               | Eukaryota | 536 |
| Uma1                       | <i>Ustilago maydis</i> 521                                                                            | 71005820  | Fungi               | Eukaryota | 496 |
| Average protein size (aas) |                                                                                                       |           |                     |           | 473 |
| SD                         |                                                                                                       |           |                     |           | 127 |
| Cluster 10                 |                                                                                                       |           |                     |           |     |
| Sen1                       | <i>Salmonella enterica</i><br><i>subsp. enterica</i><br><i>serovar Typhi</i><br><i>Serratia</i>       | 2961076   | Gammaproteobacteria | Bacteria  | 294 |
| Spr1                       | <i>proteamaculans</i> 568<br><i>Pectobacterium</i><br><i>atrosepticum</i>                             | 157370662 | Gammaproteobacteria | Bacteria  | 343 |
| Pat1                       | <i>SCRI1043</i><br><i>Dickeya dadantii</i>                                                            | 50120191  | Gammaproteobacteria | Bacteria  | 327 |
| Dda1                       | 3937                                                                                                  | 307130887 | Gammaproteobacteria | Bacteria  | 343 |
| Csp1                       | <i>Citrobacter</i> sp. 30_2<br><i>Photobacterium</i><br><i>damselae</i> subsp.<br><i>damselae</i> CIP | 237731430 | Gammaproteobacteria | Bacteria  | 339 |
| Pda1                       | 102761<br><i>Ktedonobacter</i><br><i>racemifer</i> DSM                                                | 269103122 | Gammaproteobacteria | Bacteria  | 342 |
| Kra2                       | 44963<br><i>Acetobacter</i><br><i>pasteurianus</i> IFO                                                | 298242375 | Chloroflexi         | Bacteria  | 366 |
| Apa1                       | 3283-01                                                                                               | 258543407 | Alphaproteobacteria | Bacteria  | 344 |



|      |                                                |           |                     |          |     |
|------|------------------------------------------------|-----------|---------------------|----------|-----|
| Bja1 | <i>Bradyrhizobium japonicum</i> USDA 110       | 27376265  | Alphaproteobacteria | Bacteria | 380 |
| Bsp2 | <i>Bradyrhizobium</i> sp. ORS278               | 146338747 | Alphaproteobacteria | Bacteria | 338 |
| Rso1 | <i>Ralstonia solanacearum</i> GMI1000          | 17548849  | Betaproteobacteria  | Bacteria | 357 |
| Lni1 | <i>Lutiella nitroferrum</i> 2002               | 224825413 | Betaproteobacteria  | Bacteria | 350 |
| Cvi1 | <i>Chromobacterium violaceum</i> ATCC 12472    | 34497028  | Betaproteobacteria  | Bacteria | 378 |
| Ara1 | <i>Agrobacterium radiobacter</i> K84           | 222086034 | Alphaproteobacteria | Bacteria | 349 |
| Ara2 | <i>Agrobacterium radiobacter</i> K84           | 222102289 | Alphaproteobacteria | Bacteria | 345 |
| Gbe1 | <i>Granulibacter betesdensis</i> CGDNIH1       | 114327646 | Alphaproteobacteria | Bacteria | 363 |
| Acr1 | <i>Acidiphilium cryptum</i> JF-5               | 148259367 | Alphaproteobacteria | Bacteria | 331 |
| Bvi1 | <i>Burkholderia vietnamiensis</i> G4           | 134291341 | Betaproteobacteria  | Bacteria | 355 |
| Reu1 | <i>Ralstonia eutropha</i> HI6                  | 38637728  | Betaproteobacteria  | Bacteria | 344 |
| Mra1 | <i>Methylobacterium radiotolerans</i> JCM 2831 | 170745160 | Alphaproteobacteria | Bacteria | 354 |
| Bsp5 | <i>Bradyrhizobium</i> sp. BTAi1                | 148254779 | Alphaproteobacteria | Bacteria | 364 |

|                            |                                                  |           |                     |          |     |
|----------------------------|--------------------------------------------------|-----------|---------------------|----------|-----|
| Rpa1                       | <i>Rhodopseudomonas palustris CGA009</i>         | 39933801  | Alphaproteobacteria | Bacteria | 352 |
| Bgl1                       | <i>Burkholderia gladioli BSR3</i>                | 330814682 | Betaproteobacteria  | Bacteria | 353 |
| Bvi2                       | <i>Burkholderia vietnamiensis G4</i>             | 134295707 | Betaproteobacteria  | Bacteria | 352 |
| Asp1                       | <i>Acidobacterium sp. MP5ACTX9</i>               | 322435659 | Acidobacteria       | Bacteria | 346 |
| Aca3                       | <i>Acidobacterium capsulatum ATCC 51196</i>      | 225874192 | Acidobacteria       | Bacteria | 358 |
| Bxe1                       | <i>Burkholderia xenovorans LB400</i>             | 91780108  | Betaproteobacteria  | Bacteria | 354 |
| Reu2                       | <i>Ralstonia eutropha H16</i>                    | 38637691  | Betaproteobacteria  | Bacteria | 351 |
| Sja1                       | <i>Sphingobium japonicum UT26S</i>               | 294146734 | Alphaproteobacteria | Bacteria | 357 |
| Nar1                       | <i>Novosphingobium aromaticivorans DSM 12444</i> | 87198369  | Alphaproteobacteria | Bacteria | 371 |
| Ssp2                       | <i>Sphingomonas sp. S17</i>                      | 332188472 | Alphaproteobacteria | Bacteria | 353 |
| Nni1                       | <i>Novosphingobium nitrogenifigens DSM 19370</i> | 326385346 | Alphaproteobacteria | Bacteria | 349 |
| Bce2                       | <i>Burkholderia cenocepacia J2315</i>            | 206561078 | Betaproteobacteria  | Bacteria | 347 |
| Bsp4                       | <i>Burkholderia sp. Ch1-1</i>                    | 296157179 | Betaproteobacteria  | Bacteria | 335 |
| Average protein size (aas) |                                                  |           |                     |          | 350 |
| SD                         |                                                  |           |                     |          | 15  |



**Table S4.** 52 OST protein sequences included in this study. Proteins are listed clockwise starting from Cluster 1 (see Fig. S4).

| Abbreviation               | Organism                           | GenBank Index# | Group   | Domain    | Protein Size |
|----------------------------|------------------------------------|----------------|---------|-----------|--------------|
| Cluster 1                  |                                    |                |         |           |              |
| Aec1                       | <i>Acromyrmex echinator</i>        | 332025948      | Metazoa | Eukaryota | 331          |
| Cfl1                       | <i>Camponotus floridanus</i>       | 307171448      | Metazoa | Eukaryota | 320          |
| Hsa2                       | <i>Harpegnathos saltator</i>       | 307209024      | Metazoa | Eukaryota | 335          |
| Ame1                       | <i>Apis mellifera</i>              | 328781239      | Metazoa | Eukaryota | 341          |
| Nvi1                       | <i>Nasonia vitripennis</i>         | 156554046      | Metazoa | Eukaryota | 351          |
| Aae1                       | <i>Aedes aegypti</i>               | 157138577      | Metazoa | Eukaryota | 320          |
| Cqu1                       | <i>Culex quinquefasciatus</i>      | 170034785      | Metazoa | Eukaryota | 317          |
| Aga1                       | <i>Anopheles gambiae str. PEST</i> | 118793812      | Metazoa | Eukaryota | 312          |
| Average protein size (aas) |                                    |                |         |           | 328          |
| SD                         |                                    |                |         |           | 13           |
| Cluster 2                  |                                    |                |         |           |              |
| Dpu1                       | <i>Daphnia pulex</i>               | 321454526      | Metazoa | Eukaryota | 361          |
| Dpu2                       | <i>Daphnia pulex</i>               | 321476811      | Metazoa | Eukaryota | 363          |
| Dpu3                       | <i>Daphnia pulex</i>               | 321454527      | Metazoa | Eukaryota | 315          |
| Average protein size (aas) |                                    |                |         |           | 346          |
| SD                         |                                    |                |         |           | 27           |
| Cluster 3                  |                                    |                |         |           |              |
| Cbr1                       | <i>Caenorhabditis briggsae</i>     | 268530378      | Metazoa | Eukaryota | 348          |
| Aca3                       | <i>Angiostrongylus cantonensis</i> | 256016461      | Metazoa | Eukaryota | 370          |
| Llo1                       | <i>Loa loa</i>                     | 312068356      | Metazoa | Eukaryota | 349          |
| Bma1                       | <i>Brugia malayi</i>               | 170592162      | Metazoa | Eukaryota | 349          |
| Asu1                       | <i>Ascaris suum</i>                | 324510389      | Metazoa | Eukaryota | 332          |
| Cbr2                       | <i>Caenorhabditis briggsae</i>     | 268531320      | Metazoa | Eukaryota | 342          |
| Average protein size (aas) |                                    |                |         |           | 348          |
| SD                         |                                    |                |         |           | 12           |
| Cluster 4                  |                                    |                |         |           |              |
| Dre2                       | <i>Danio rerio</i>                 | 189522496      | Metazoa | Eukaryota | 414          |
| Tni2                       | <i>Tetraodon nigroviridis</i>      | 47209270       | Metazoa | Eukaryota | 869          |
| Tsp1                       | <i>Trichinella spiralis</i>        | 316978264      | Metazoa | Eukaryota | 352          |
| Average protein size (aas) |                                    |                |         |           | 545          |
| SD                         |                                    |                |         |           | 282          |

## Cluster 5

|      |                                             |           |               |           |     |
|------|---------------------------------------------|-----------|---------------|-----------|-----|
|      | <i>Capsaspora owczarzaki</i> ATCC 30864     | 320163545 | Ichthyosporea | Eukaryota | 342 |
| Cow1 | <i>Chlamydomonas reinhardtii</i>            | 159465163 | Viridiplantae | Eukaryota | 307 |
| Cre2 | <i>Dictyostelium discoideum</i> AX4         | 66819373  | none          | Eukaryota | 507 |
| Ddi1 | <i>Phytophthora sojae</i>                   | 210160949 | none          | Eukaryota | 347 |
| Pso1 | <i>Arabidopsis thaliana</i>                 | 18411404  | Viridiplantae | Eukaryota | 484 |
| Ath8 | <i>Schizosaccharomyces japonicus</i> yFS275 | 213408178 | Fungi         | Eukaryota | 428 |
| Sja1 | <i>Melampsora larici-populina</i> 98AG31    | 328863521 | Fungi         | Eukaryota | 403 |
| Mla1 | <i>Neurospora crassa</i>                    | 8510698   | Fungi         | Eukaryota | 578 |
| Ncr1 |                                             |           |               |           |     |
|      | Average protein size (aas)                  |           |               |           | 424 |
|      | SD                                          |           |               |           | 93  |

## Cluster 6

|      |                                      |           |         |           |     |
|------|--------------------------------------|-----------|---------|-----------|-----|
| Gga1 | <i>Gallus gallus</i>                 | 118095143 | Metazoa | Eukaryota | 335 |
| Tgu2 | <i>Taeniopygia guttata</i>           | 224060601 | Metazoa | Eukaryota | 362 |
|      | <i>Canis lupus familiaris</i>        | 74002938  | Metazoa | Eukaryota | 353 |
| Clu1 | <i>Equus caballus</i>                | 149731523 | Metazoa | Eukaryota | 340 |
| Eca1 | <i>Macaca mulatta</i>                | 109054285 | Metazoa | Eukaryota | 340 |
| Mmu3 | <i>Mus musculus</i>                  | 22122353  | Metazoa | Eukaryota | 340 |
| Mmu1 | <i>Sus scrofa</i>                    | 311269855 | Metazoa | Eukaryota | 340 |
| Ssc1 | <i>Bos taurus</i>                    | 122140433 | Metazoa | Eukaryota | 340 |
| Bta2 | <i>Monodelphis domestica</i>         | 126325983 | Metazoa | Eukaryota | 340 |
| Mdo1 | <i>Anolis carolinensis</i>           | 327289371 | Metazoa | Eukaryota | 460 |
| Aca2 | <i>Xenopus (Silurana) tropicalis</i> | 301609070 | Metazoa | Eukaryota | 332 |
| Orf2 | <i>Leucoraja erinacea</i>            | 82108802  | Metazoa | Eukaryota | 352 |
| Ler1 | <i>Danio rerio</i>                   | 169146805 | Metazoa | Eukaryota | 389 |
| Dre1 | <i>Ictalurus punctatus</i>           | 318068026 | Metazoa | Eukaryota | 330 |
| Ipu1 | <i>Meleagris gallopavo</i>           | 326913536 | Metazoa | Eukaryota | 365 |
| Mga2 | <i>Gallus gallus</i>                 | 118084075 | Metazoa | Eukaryota | 536 |
| Gga2 | <i>Taeniopygia guttata</i>           | 224042671 | Metazoa | Eukaryota | 574 |
| Tgu1 | <i>Xenopus (Silurana) tropicalis</i> | 187471107 | Metazoa | Eukaryota | 339 |
| Orf1 |                                      |           |         |           |     |
|      | Average protein size (aas)           |           |         |           | 376 |
|      | SD                                   |           |         |           | 72  |

## Cluster 7

|                            |                                          |           |         |           |     |
|----------------------------|------------------------------------------|-----------|---------|-----------|-----|
| Sko1                       | <i>Saccoglossus<br/>kowalevskii</i>      | 291225656 | Metazoa | Eukaryota | 368 |
| Sko2                       | <i>Saccoglossus<br/>kowalevskii</i>      | 291225660 | Metazoa | Eukaryota | 408 |
| Sko3                       | <i>Saccoglossus<br/>kowalevskii</i>      | 291223152 | Metazoa | Eukaryota | 370 |
| Spu1                       | <i>Strongylocentrotus<br/>purpuratus</i> | 115955237 | Metazoa | Eukaryota | 377 |
| Average protein size (aas) |                                          |           |         |           | 381 |
| SD                         |                                          |           |         |           | 19  |

Cluster 8

|                            |                                   |           |         |           |     |
|----------------------------|-----------------------------------|-----------|---------|-----------|-----|
| Bfl1                       | <i>Branchiostoma<br/>floridae</i> | 260790111 | Metazoa | Eukaryota | 342 |
| Bfl2                       | <i>Branchiostoma<br/>floridae</i> | 260790095 | Metazoa | Eukaryota | 334 |
| Cin2                       | <i>Ciona intestinalis</i>         | 198422626 | Metazoa | Eukaryota | 378 |
| Cin3                       | <i>Ciona intestinalis</i>         | 198428670 | Metazoa | Eukaryota | 381 |
| Odi1                       | <i>Oikopleura dioica</i>          | 313239889 | Metazoa | Eukaryota | 401 |
| Average protein size (aas) |                                   |           |         |           | 367 |
| SD                         |                                   |           |         |           | 28  |

**Table S5.** 198 Sweet protein sequences included in this study. Proteins are listed clockwise starting from Cluster 1 (see Fig. S5).

| Abbreviation               | Organism                                           | GenBank Index# | Group        | Domain    | Protein Size |
|----------------------------|----------------------------------------------------|----------------|--------------|-----------|--------------|
| Cluster 1                  |                                                    |                |              |           |              |
| Nca1                       | <i>Neospora caninum</i><br><i>Liverpool</i>        | 325120066      | Apicomplexa  | Eukaryota | 672          |
| Tgo1                       | <i>Toxoplasma gondii</i><br><i>GT1</i>             | 221480968      | Apicomplexa  | Eukaryota | 666          |
| Ala2                       | <i>Albugo laibachii</i><br><i>Nc14</i>             | 325182587      | Albuginaceae | Eukaryota | 268          |
| Pin10                      | <i>Phytophthora</i><br><i>infestans T30-4</i>      | 301098858      | none         | Eukaryota | 235          |
| Isc1                       | <i>Ixodes scapularis</i>                           | 241638533      | Metazoa      | Eukaryota | 204          |
| Average protein size (aas) |                                                    |                |              |           | 409          |
| SD                         |                                                    |                |              |           | 238          |
| Cluster 2                  |                                                    |                |              |           |              |
| Dgr1                       | <i>Drosophila</i><br><i>grimshawi</i>              | 195079676      | Metazoa      | Eukaryota | 232          |
| Dan2                       | <i>Drosophila</i><br><i>ananassae</i>              | 194751517      | Metazoa      | Eukaryota | 228          |
| Aga1                       | <i>Anopheles gambiae</i><br><i>str. PEST</i>       | 118785023      | Metazoa      | Eukaryota | 224          |
| Aae2                       | <i>Aedes aegypti</i>                               | 157109690      | Metazoa      | Eukaryota | 222          |
| Aae4                       | <i>Aedes aegypti</i>                               | 157114191      | Metazoa      | Eukaryota | 228          |
| Aae3                       | <i>Aedes aegypti</i>                               | 157109688      | Metazoa      | Eukaryota | 228          |
| Cfl1                       | <i>Camponotus</i><br><i>floridanus</i>             | 307187728      | Metazoa      | Eukaryota | 222          |
| Ame2                       | <i>Apis mellifera</i>                              | 66509804       | Metazoa      | Eukaryota | 220          |
| Tca1                       | <i>Tribolium castaneum</i>                         | 270013117      | Metazoa      | Eukaryota | 223          |
| Api1                       | <i>Acyrtosiphon pisum</i><br><i>Lepeophtheirus</i> | 193718421      | Metazoa      | Eukaryota | 211          |
| Lsa1                       | <i>salmonis</i>                                    | 290561829      | Metazoa      | Eukaryota | 229          |
| Aae1                       | <i>Aedes aegypti</i><br><i>Anopheles gambiae</i>   | 157112765      | Metazoa      | Eukaryota | 232          |
| Aga2                       | <i>str. PEST</i><br><i>Drosophila</i>              | 119113928      | Metazoa      | Eukaryota | 229          |
| Dan1                       | <i>ananassae</i>                                   | 194757529      | Metazoa      | Eukaryota | 226          |
| Tca2                       | <i>Tribolium castaneum</i><br><i>Harpegnathos</i>  | 91082333       | Metazoa      | Eukaryota | 213          |
| Hsa1                       | <i>saltator</i>                                    | 307203973      | Metazoa      | Eukaryota | 215          |
| Sin1                       | <i>Solenopsis invicta</i>                          | 322779873      | Metazoa      | Eukaryota | 218          |
| Ame1                       | <i>Apis mellifera</i>                              | 48099654       | Metazoa      | Eukaryota | 220          |
| Nvi2                       | <i>Nasonia vitripennis</i>                         | 268370163      | Metazoa      | Eukaryota | 218          |
| Api2                       | <i>Acyrtosiphon pisum</i>                          | 328717862      | Metazoa      | Eukaryota | 271          |
| Phu1                       | <i>Pediculus humanus</i>                           | 242017704      | Metazoa      | Eukaryota | 221          |

|                            |                             |           |                |           |     |
|----------------------------|-----------------------------|-----------|----------------|-----------|-----|
|                            | <i>corporis</i>             |           |                |           |     |
| Asu2                       | <i>Ascaris suum</i>         | 324509744 | Metazoa        | Eukaryota | 352 |
|                            | <i>Caenorhabditis</i>       |           |                |           |     |
| Cbr3                       | <i>briggsae</i>             | 268553953 | Metazoa        | Eukaryota | 293 |
|                            | <i>Caenorhabditis</i>       |           |                |           |     |
| Cel1                       | <i>elegans</i>              | 17558938  | Metazoa        | Eukaryota | 233 |
| Dpu1                       | <i>Daphnia pulex</i>        | 321476861 | Metazoa        | Eukaryota | 221 |
| Bma1                       | <i>Brugia malayi</i>        | 170591735 | Metazoa        | Eukaryota | 254 |
| Asu3                       | <i>Ascaris suum</i>         | 324518669 | Metazoa        | Eukaryota | 224 |
|                            | <i>Caenorhabditis</i>       |           |                |           |     |
| Cbr1                       | <i>briggsae</i>             | 268552629 | Metazoa        | Eukaryota | 354 |
| Asu1                       | <i>Ascaris suum</i>         | 324506374 | Metazoa        | Eukaryota | 375 |
|                            | <i>Caenorhabditis</i>       |           |                |           |     |
| Cbr2                       | <i>briggsae</i>             | 268574740 | Metazoa        | Eukaryota | 188 |
| Average protein size (aas) |                             |           |                |           | 241 |
| SD                         |                             |           |                |           | 45  |
| Cluster 3                  |                             |           |                |           |     |
|                            | <i>Strongylocentrotus</i>   |           |                |           |     |
| Spu1                       | <i>purpuratus</i>           | 72160154  | Metazoa        | Eukaryota | 184 |
|                            | <i>Nematostella</i>         |           |                |           |     |
| Nve2                       | <i>vectensis</i>            | 156374131 | Metazoa        | Eukaryota | 225 |
|                            | <i>Branchiostoma</i>        |           |                |           |     |
| Bfl2                       | <i>floridae</i>             | 260800273 | Metazoa        | Eukaryota | 220 |
|                            | <i>Salpingoeca sp.</i>      |           |                |           |     |
| Ssp2                       | <i>ATCC 50818</i>           | 326431165 | Salpingoecidae | Eukaryota | 221 |
| Tad1                       | <i>Trichoplax adhaerens</i> | 196002641 | Metazoa        | Eukaryota | 217 |
|                            | <i>Nematostella</i>         |           |                |           |     |
| Nve1                       | <i>vectensis</i>            | 156353371 | Metazoa        | Eukaryota | 216 |
| Cja1                       | <i>Callithrix jacchus</i>   | 296229069 | Metazoa        | Eukaryota | 221 |
| Xla1                       | <i>Xenopus laevis</i>       | 148235825 | Metazoa        | Eukaryota | 216 |
| Dre1                       | <i>Danio rerio</i>          | 206558238 | Metazoa        | Eukaryota | 219 |
|                            | <i>Tetraodon</i>            |           |                |           |     |
| Tni1                       | <i>nigroviridis</i>         | 47225383  | Metazoa        | Eukaryota | 219 |
|                            | <i>Branchiostoma</i>        |           |                |           |     |
| Bfl1                       | <i>floridae</i>             | 260829761 | Metazoa        | Eukaryota | 210 |
| Cin1                       | <i>Ciona intestinalis</i>   | 198433250 | Metazoa        | Eukaryota | 215 |
| Average protein size (aas) |                             |           |                |           | 215 |
| SD                         |                             |           |                |           | 11  |
| Cluster 4                  |                             |           |                |           |     |
| Odi1                       | <i>Oikopleura dioica</i>    | 313214716 | Metazoa        | Eukaryota | 219 |
|                            | <i>Batrachochytrium</i>     |           |                |           |     |
| Bde3                       | <i>dendrobatidis JAM81</i>  | 328769156 | Fungi          | Eukaryota | 224 |
| Average protein size (aas) |                             |           |                |           | 222 |
| SD                         |                             |           |                |           | 4   |



## Cluster 5

|                            |                                       |           |              |           |     |
|----------------------------|---------------------------------------|-----------|--------------|-----------|-----|
| Ddi1                       | <i>Dictyostelium discoideum</i> AX4   | 66806629  | none         | Eukaryota | 220 |
| Dpu2                       | <i>Dictyostelium purpureum</i>        | 330798800 | none         | Eukaryota | 218 |
| Ppa3                       | <i>Polysphondylium pallidum</i> PN500 | 281212522 | none         | Eukaryota | 673 |
| Esi1                       | <i>Ectocarpus siliculosus</i>         | 299470883 | Phaeophyceae | Eukaryota | 224 |
| Average protein size (aas) |                                       |           |              |           | 334 |
| SD                         |                                       |           |              |           | 226 |

## Cluster 6

|                            |                                              |           |                 |           |     |
|----------------------------|----------------------------------------------|-----------|-----------------|-----------|-----|
| Ala1                       | <i>Albugo laibachii</i> Nc14                 | 325184656 | Albuginaceae    | Eukaryota | 239 |
| Pin12                      | <i>Phytophthora infestans</i> T30-4          | 301101261 | none            | Eukaryota | 239 |
| Ssp1                       | <i>Salpingoeca sp.</i> ATCC 50818            | 326432237 | Salpingoecidae  | Eukaryota | 348 |
| Mbr1                       | <i>Monosiga brevicollis</i> MX1              | 167515384 | Codonosigidae   | Eukaryota | 249 |
| Tps1                       | <i>Thalassiosira pseudonana</i> CCMP1335     | 224011239 | Bacillariophyta | Eukaryota | 191 |
| Tps2                       | <i>Thalassiosira pseudonana</i> CCMP1335     | 223994243 | Bacillariophyta | Eukaryota | 204 |
| Ptr7                       | <i>Phaeodactylum tricornutum</i> CCAP 1055/1 | 219111545 | Bacillariophyta | Eukaryota | 229 |
| Aan1                       | <i>Aureococcus anophagefferens</i>           | 323456250 | Pelagophyceae   | Eukaryota | 243 |
| Average protein size (aas) |                                              |           |                 |           | 243 |
| SD                         |                                              |           |                 |           | 47  |

## Cluster 7

|       |                                     |           |      |           |     |
|-------|-------------------------------------|-----------|------|-----------|-----|
| Pin2  | <i>Phytophthora infestans</i> T30-4 | 301115910 | none | Eukaryota | 315 |
| Pin11 | <i>Phytophthora infestans</i> T30-4 | 301115904 | none | Eukaryota | 230 |
| Pin13 | <i>Phytophthora infestans</i> T30-4 | 301094617 | none | Eukaryota | 203 |
| Pin14 | <i>Phytophthora infestans</i> T30-4 | 301115906 | none | Eukaryota | 263 |
| Pin4  | <i>Phytophthora</i>                 | 301115908 | none | Eukaryota | 247 |

|                            |                               |           |               |           |      |
|----------------------------|-------------------------------|-----------|---------------|-----------|------|
|                            | <i>infestans T30-4</i>        |           |               |           |      |
|                            | <i>Phytophthora</i>           |           |               |           |      |
| Pin9                       | <i>infestans T30-4</i>        | 301115912 | none          | Eukaryota | 403  |
|                            | <i>Phytophthora</i>           |           |               |           |      |
| Pin7                       | <i>infestans T30-4</i>        | 301099708 | none          | Eukaryota | 324  |
|                            | <i>Phytophthora</i>           |           |               |           |      |
| Pin8                       | <i>infestans T30-4</i>        | 301090305 | none          | Eukaryota | 259  |
|                            | <i>Phytophthora</i>           |           |               |           |      |
| Pin5                       | <i>infestans T30-4</i>        | 301094603 | none          | Eukaryota | 308  |
|                            | <i>Phytophthora</i>           |           |               |           |      |
| Pin3                       | <i>infestans T30-4</i>        | 301102307 | none          | Eukaryota | 296  |
| Average protein size (aas) |                               |           |               |           | 285  |
| SD                         |                               |           |               |           | 57   |
| Cluster 8                  |                               |           |               |           |      |
| Bbo1                       | <i>Babesia bovis T2Bo</i>     | 156085796 | Apicomplexa   | Eukaryota | 390  |
|                            | <i>Theileria parva strain</i> |           |               |           |      |
| Tpa1                       | <i>Muguga</i>                 | 71033785  | Apicomplexa   | Eukaryota | 379  |
|                            | <i>Plasmodium berghei</i>     |           |               |           |      |
| Pbe1                       | <i>str. ANKA</i>              | 68073307  | Apicomplexa   | Eukaryota | 487  |
|                            | <i>Plasmodium vivax</i>       |           |               |           |      |
| Pvi1                       | <i>SaI-1</i>                  | 156093685 | Apicomplexa   | Eukaryota | 661  |
|                            | <i>Saccoglossus</i>           |           |               |           |      |
| Sko1                       | <i>kowalevskii</i>            | 291221641 | Metazoa       | Eukaryota | 1174 |
| Psi1                       | <i>Picea sitchensis</i>       | 294461247 | Viridiplantae | Eukaryota | 208  |
|                            | <i>Arabidopsis lyrata</i>     |           |               |           |      |
| Aly3                       | <i>subsp. lyrata</i>          | 297792819 | Viridiplantae | Eukaryota | 290  |
| Average protein size (aas) |                               |           |               |           | 513  |
| SD                         |                               |           |               |           | 325  |
| Cluster 9                  |                               |           |               |           |      |
| Mpu1                       | <i>Micromonas pusilla</i>     |           |               |           |      |
|                            | <i>CCMP1545</i>               | 303277429 | Viridiplantae | Eukaryota | 209  |
|                            | <i>Micromonas sp.</i>         |           |               |           |      |
| Msp1                       | <i>RCC299</i>                 | 255075637 | Viridiplantae | Eukaryota | 254  |
| Ota1                       | <i>Ostreococcus tauri</i>     | 308802750 | Viridiplantae | Eukaryota | 250  |
|                            | <i>Ostreococcus</i>           |           |               |           |      |
| Olu1                       | <i>lucimarinus CCE9901</i>    | 145345954 | Viridiplantae | Eukaryota | 242  |
|                            | <i>Chlamydomonas</i>          |           |               |           |      |
| Cre1                       | <i>reinhardtii</i>            | 159476704 | Viridiplantae | Eukaryota | 231  |
| Cva1                       | <i>Chlorella variabilis</i>   | 307106643 | Viridiplantae | Eukaryota | 266  |
|                            | <i>Chlamydomonas</i>          |           |               |           |      |
| Cre2                       | <i>reinhardtii</i>            | 159476230 | Viridiplantae | Eukaryota | 249  |
|                            | <i>Volvox carteri f.</i>      |           |               |           |      |
| Vca1                       | <i>nagariensis</i>            | 302840323 | Viridiplantae | Eukaryota | 315  |
| Bde1                       | <i>Batrachochytrium</i>       | 328771906 | Fungi         | Eukaryota | 233  |

|            |                              |           |               |           |     |
|------------|------------------------------|-----------|---------------|-----------|-----|
|            | <i>dendrobatidis JAM81</i>   |           |               |           |     |
|            | <i>Batrachochytrium</i>      |           |               |           |     |
| Bde2       | <i>dendrobatidis JAM81</i>   | 328771907 | Fungi         | Eukaryota | 236 |
|            | <i>Capsaspora</i>            |           |               |           |     |
|            | <i>owczarzaki ATCC</i>       |           |               |           |     |
| Cow1       | <i>30864</i>                 | 320168194 | Ichthyosporia | Eukaryota | 283 |
|            | <i>Dictyostelium</i>         |           |               |           |     |
| Ddi2       | <i>discoideum AX4</i>        | 66808155  | none          | Eukaryota | 299 |
|            | <i>Dictyostelium</i>         |           |               |           |     |
| Dpu4       | <i>purpureum</i>             | 330795005 | none          | Eukaryota | 289 |
|            | <i>Dictyostelium</i>         |           |               |           |     |
| Ddi3       | <i>discoideum AX4</i>        | 66806795  | none          | Eukaryota | 336 |
|            | <i>Dictyostelium</i>         |           |               |           |     |
| Dpu3       | <i>purpureum</i>             | 330805201 | none          | Eukaryota | 256 |
|            | Average protein size (aas)   |           |               |           | 263 |
|            | SD                           |           |               |           | 35  |
| Cluster 10 |                              |           |               |           |     |
| Ptr1       | <i>Populus trichocarpa</i>   | 224085065 | Viridiplantae | Eukaryota | 248 |
| Gma8       | <i>Glycine max</i>           | 255637929 | Viridiplantae | Eukaryota | 247 |
| Psi5       | <i>Picea sitchensis</i>      | 116782985 | Viridiplantae | Eukaryota | 260 |
| Zma2       | <i>Zea mays</i>              | 226500492 | Viridiplantae | Eukaryota | 267 |
| Sbi10      | <i>Sorghum bicolor</i>       | 242090583 | Viridiplantae | Eukaryota | 256 |
| Ath7       | <i>Arabidopsis thaliana</i>  | 18400517  | Viridiplantae | Eukaryota | 236 |
| Vvi10      | <i>Vitis vinifera</i>        | 225461810 | Viridiplantae | Eukaryota | 235 |
| Ptr2       | <i>Populus trichocarpa</i>   | 224061395 | Viridiplantae | Eukaryota | 216 |
| Zma4       | <i>Zea mays</i>              | 226508060 | Viridiplantae | Eukaryota | 243 |
|            | <i>Oryza sativa Indica</i>   |           |               |           |     |
| Osa13      | <i>Group</i>                 | 125549501 | Viridiplantae | Eukaryota | 471 |
| Vvi11      | <i>Vitis vinifera</i>        | 225462464 | Viridiplantae | Eukaryota | 232 |
| Ptr16      | <i>Populus trichocarpa</i>   | 224061033 | Viridiplantae | Eukaryota | 218 |
| Psi4       | <i>Picea sitchensis</i>      | 294460447 | Viridiplantae | Eukaryota | 231 |
| Sbi7       | <i>Sorghum bicolor</i>       | 242054131 | Viridiplantae | Eukaryota | 231 |
|            | <i>Selaginella</i>           |           |               |           |     |
| Smo4       | <i>moellendorffii</i>        | 302753780 | Viridiplantae | Eukaryota | 239 |
|            | <i>Selaginella</i>           |           |               |           |     |
| Smo15      | <i>moellendorffii</i>        | 302773003 | Viridiplantae | Eukaryota | 202 |
|            | Average protein size (aas)   |           |               |           | 252 |
|            | SD                           |           |               |           | 61  |
| Cluster 11 |                              |           |               |           |     |
|            | <i>Selaginella</i>           |           |               |           |     |
| Smo14      | <i>moellendorffii</i>        | 302808073 | Viridiplantae | Eukaryota | 498 |
|            | <i>Selaginella</i>           |           |               |           |     |
| Smo10      | <i>moellendorffii</i>        | 302804901 | Viridiplantae | Eukaryota | 362 |
| Ppa5       | <i>Physcomitrella patens</i> | 168052757 | Viridiplantae | Eukaryota | 191 |

|            |                              |           |               |           |     |
|------------|------------------------------|-----------|---------------|-----------|-----|
|            | <i>subsp. patens</i>         |           |               |           |     |
|            | <i>Selaginella</i>           |           |               |           |     |
| Smo3       | <i>moellendorffii</i>        | 302781266 | Viridiplantae | Eukaryota | 254 |
|            | <i>Selaginella</i>           |           |               |           |     |
| Smo5       | <i>moellendorffii</i>        | 302825721 | Viridiplantae | Eukaryota | 246 |
|            | <i>Selaginella</i>           |           |               |           |     |
| Smo8       | <i>moellendorffii</i>        | 302773225 | Viridiplantae | Eukaryota | 244 |
|            | <i>Selaginella</i>           |           |               |           |     |
| Smo9       | <i>moellendorffii</i>        | 302757455 | Viridiplantae | Eukaryota | 211 |
|            | <i>Physcomitrella patens</i> |           |               |           |     |
| Ppa1       | <i>subsp. patens</i>         | 168052158 | Viridiplantae | Eukaryota | 247 |
|            | <i>Physcomitrella patens</i> |           |               |           |     |
| Ppa2       | <i>subsp. patens</i>         | 168036203 | Viridiplantae | Eukaryota | 253 |
|            | <i>Physcomitrella patens</i> |           |               |           |     |
| Ppa4       | <i>subsp. patens</i>         | 168014545 | Viridiplantae | Eukaryota | 251 |
|            |                              |           |               |           | 276 |
|            | Average protein size (aas)   |           |               |           |     |
|            | SD                           |           |               |           | 90  |
| Cluster 12 |                              |           |               |           |     |
| Sbi2       | <i>Sorghum bicolor</i>       | 242091553 | Viridiplantae | Eukaryota | 239 |
| Sbi14      | <i>Sorghum bicolor</i>       | 242053547 | Viridiplantae | Eukaryota | 244 |
|            | <i>Oryza sativa Japonica</i> |           |               |           |     |
| Osa2       | Group                        | 115478214 | Viridiplantae | Eukaryota | 375 |
| Vvi12      | <i>Vitis vinifera</i>        | 225452486 | Viridiplantae | Eukaryota | 254 |
| Ath2       | <i>Arabidopsis thaliana</i>  | 186532678 | Viridiplantae | Eukaryota | 240 |
|            | <i>Solanum</i>               |           |               |           |     |
| Sly1       | <i>lycopersicum</i>          | 37050896  | Viridiplantae | Eukaryota | 238 |
| Vvi3       | <i>Vitis vinifera</i>        | 225457069 | Viridiplantae | Eukaryota | 234 |
| Ath1       | <i>Arabidopsis thaliana</i>  | 21592355  | Viridiplantae | Eukaryota | 251 |
| Ptr6       | <i>Populus trichocarpa</i>   | 224133506 | Viridiplantae | Eukaryota | 237 |
| Gma5       | <i>Glycine max</i>           | 255645477 | Viridiplantae | Eukaryota | 247 |
| Ptr18      | <i>Populus trichocarpa</i>   | 224075142 | Viridiplantae | Eukaryota | 255 |
| Rco11      | <i>Ricinus communis</i>      | 255555653 | Viridiplantae | Eukaryota | 261 |
| Vvi9       | <i>Vitis vinifera</i>        | 225426236 | Viridiplantae | Eukaryota | 260 |
| Sbi6       | <i>Sorghum bicolor</i>       | 242064916 | Viridiplantae | Eukaryota | 250 |
| Ath12      | <i>Arabidopsis thaliana</i>  | 15219732  | Viridiplantae | Eukaryota | 261 |
| Rco6       | <i>Ricinus communis</i>      | 255552606 | Viridiplantae | Eukaryota | 242 |
| Ptr19      | <i>Populus trichocarpa</i>   | 224055573 | Viridiplantae | Eukaryota | 242 |
| Rco10      | <i>Ricinus communis</i>      | 255576288 | Viridiplantae | Eukaryota | 233 |
| Rco1       | <i>Ricinus communis</i>      | 255584088 | Viridiplantae | Eukaryota | 236 |
| Ath10      | <i>Arabidopsis thaliana</i>  | 18421965  | Viridiplantae | Eukaryota | 239 |
|            | <i>Arabidopsis lyrata</i>    |           |               |           |     |
| Aly2       | <i>subsp. lyrata</i>         | 297789376 | Viridiplantae | Eukaryota | 224 |
|            |                              |           |               |           | 251 |
|            | Average protein size (aas)   |           |               |           |     |
|            | SD                           |           |               |           | 30  |

## Cluster 13

|       |                                          |           |               |           |     |
|-------|------------------------------------------|-----------|---------------|-----------|-----|
| Vvi1  | <i>Vitis vinifera</i>                    | 296086628 | Viridiplantae | Eukaryota | 341 |
| Rco3  | <i>Ricinus communis</i>                  | 255559318 | Viridiplantae | Eukaryota | 286 |
| Ath9  | <i>Arabidopsis thaliana</i>              | 15225014  | Viridiplantae | Eukaryota | 258 |
| Ptr8  | <i>Populus trichocarpa</i>               | 224109054 | Viridiplantae | Eukaryota | 259 |
| Orf1  | <i>Petunia x hybrida</i>                 | 75172033  | Viridiplantae | Eukaryota | 265 |
| Vvi8  | <i>Vitis vinifera</i>                    | 225462403 | Viridiplantae | Eukaryota | 278 |
| Gma2  | <i>Glycine max</i>                       | 255638124 | Viridiplantae | Eukaryota | 257 |
| Vvi5  | <i>Vitis vinifera</i>                    | 225456416 | Viridiplantae | Eukaryota | 270 |
| Can1  | <i>Capsicum annuum</i>                   | 257831431 | Viridiplantae | Eukaryota | 301 |
| Rco4  | <i>Ricinus communis</i>                  | 255540127 | Viridiplantae | Eukaryota | 279 |
| Ptr12 | <i>Populus trichocarpa</i>               | 224134076 | Viridiplantae | Eukaryota | 269 |
| Ath13 | <i>Arabidopsis thaliana</i>              | 15241265  | Viridiplantae | Eukaryota | 289 |
| Ath3  | <i>Arabidopsis thaliana</i>              | 15229019  | Viridiplantae | Eukaryota | 289 |
| Ath5  | <i>Arabidopsis thaliana</i>              | 15234863  | Viridiplantae | Eukaryota | 281 |
| Rco5  | <i>Ricinus communis</i>                  | 255540123 | Viridiplantae | Eukaryota | 297 |
| Ptr15 | <i>Populus trichocarpa</i>               | 224136248 | Viridiplantae | Eukaryota | 275 |
| Sbi4  | <i>Sorghum bicolor</i>                   | 242083388 | Viridiplantae | Eukaryota | 302 |
| Sbi5  | <i>Sorghum bicolor</i>                   | 242071019 | Viridiplantae | Eukaryota | 291 |
| Sbi3  | <i>Sorghum bicolor</i>                   | 242065206 | Viridiplantae | Eukaryota | 336 |
| Mtr2  | <i>Medicago truncatula</i>               | 217072936 | Viridiplantae | Eukaryota | 278 |
| Rco2  | <i>Ricinus communis</i>                  | 255540121 | Viridiplantae | Eukaryota | 285 |
| Sbi12 | <i>Sorghum bicolor</i>                   | 242049796 | Viridiplantae | Eukaryota | 273 |
| Sbi15 | <i>Sorghum bicolor</i>                   | 242079839 | Viridiplantae | Eukaryota | 309 |
| Vvi4  | <i>Vitis vinifera</i>                    | 297734468 | Viridiplantae | Eukaryota | 288 |
| Gma4  | <i>Glycine max</i>                       | 255648175 | Viridiplantae | Eukaryota | 268 |
| Ptr11 | <i>Populus trichocarpa</i>               | 224072514 | Viridiplantae | Eukaryota | 273 |
| Ath8  | <i>Arabidopsis thaliana</i>              | 15240040  | Viridiplantae | Eukaryota | 292 |
| Vvi13 | <i>Vitis vinifera</i>                    | 225425180 | Viridiplantae | Eukaryota | 289 |
| Gma3  | <i>Glycine max</i>                       | 255636015 | Viridiplantae | Eukaryota | 280 |
| Sbi8  | <i>Sorghum bicolor</i>                   | 242035771 | Viridiplantae | Eukaryota | 313 |
| Osa12 | <i>Oryza sativa Indica</i><br>Group      | 322967558 | Viridiplantae | Eukaryota | 300 |
| Hvu1  | <i>Hordeum vulgare</i><br>subsp. vulgare | 326502880 | Viridiplantae | Eukaryota | 314 |
| Smo1  | <i>Selaginella</i><br>moellendorffii     | 302820242 | Viridiplantae | Eukaryota | 206 |
| Smo11 | <i>Selaginella</i><br>moellendorffii     | 302796894 | Viridiplantae | Eukaryota | 196 |
| Vvi2  | <i>Vitis vinifera</i>                    | 225450721 | Viridiplantae | Eukaryota | 298 |
| Ptr14 | <i>Populus trichocarpa</i>               | 224123056 | Viridiplantae | Eukaryota | 198 |
| Osa6  | <i>Oryza sativa Indica</i><br>Group      | 218192806 | Viridiplantae | Eukaryota | 331 |
| Zma8  | <i>Zea mays</i>                          | 195613130 | Viridiplantae | Eukaryota | 238 |
| Psi3  | <i>Picea sitchensis</i>                  | 294462834 | Viridiplantae | Eukaryota | 335 |
| Ath11 | <i>Arabidopsis thaliana</i>              | 27754697  | Viridiplantae | Eukaryota | 241 |

|                            |                            |           |               |           |     |
|----------------------------|----------------------------|-----------|---------------|-----------|-----|
| Ptr3                       | <i>Populus trichocarpa</i> | 224130420 | Viridiplantae | Eukaryota | 238 |
| Gma7                       | <i>Glycine max</i>         | 255646128 | Viridiplantae | Eukaryota | 245 |
| Ptr5                       | <i>Populus trichocarpa</i> | 224123068 | Viridiplantae | Eukaryota | 238 |
| Vvi7                       | <i>Vitis vinifera</i>      | 225450717 | Viridiplantae | Eukaryota | 278 |
| Ptr13                      | <i>Populus trichocarpa</i> | 224123066 | Viridiplantae | Eukaryota | 239 |
| Rco7                       | <i>Ricinus communis</i>    | 255582276 | Viridiplantae | Eukaryota | 249 |
| Ptr9                       | <i>Populus trichocarpa</i> | 224123826 | Viridiplantae | Eukaryota | 217 |
| Average protein size (aas) |                            |           |               |           | 275 |
| SD                         |                            |           |               |           | 34  |

#### Cluster 14

|                            |                             |           |               |           |     |
|----------------------------|-----------------------------|-----------|---------------|-----------|-----|
|                            | <i>Oryza sativa Indica</i>  |           |               |           |     |
| Osa8                       | Group                       | 218196292 | Viridiplantae | Eukaryota | 248 |
| Zma6                       | <i>Zea mays</i>             | 308081627 | Viridiplantae | Eukaryota | 238 |
| Sbi13                      | <i>Sorghum bicolor</i>      | 242051563 | Viridiplantae | Eukaryota | 259 |
| Psi2                       | <i>Picea sitchensis</i>     | 116791551 | Viridiplantae | Eukaryota | 272 |
| Ptr10                      | <i>Populus trichocarpa</i>  | 224120614 | Viridiplantae | Eukaryota | 255 |
| Ath14                      | <i>Arabidopsis thaliana</i> | 42568507  | Viridiplantae | Eukaryota | 263 |
| Gma9                       | <i>Glycine max</i>          | 255647679 | Viridiplantae | Eukaryota | 254 |
| Average protein size (aas) |                             |           |               |           | 256 |
| SD                         |                             |           |               |           | 11  |

#### Cluster 15

|                            |                        |           |               |           |     |
|----------------------------|------------------------|-----------|---------------|-----------|-----|
| Sbi9                       | <i>Sorghum bicolor</i> | 242051793 | Viridiplantae | Eukaryota | 213 |
| Sbi16                      | <i>Sorghum bicolor</i> | 242051795 | Viridiplantae | Eukaryota | 242 |
| Average protein size (aas) |                        |           |               |           | 228 |
| SD                         |                        |           |               |           | 21  |

#### Cluster 16

|                            |                          |           |             |           |     |
|----------------------------|--------------------------|-----------|-------------|-----------|-----|
|                            | <i>Perkinsus marinus</i> |           |             |           |     |
| Pma3                       | ATCC 50983               | 294894544 | Perkinsidae | Eukaryota | 231 |
|                            | <i>Perkinsus marinus</i> |           |             |           |     |
| Pma2                       | ATCC 50983               | 294942416 | Perkinsidae | Eukaryota | 286 |
| Average protein size (aas) |                          |           |             |           | 259 |
| SD                         |                          |           |             |           | 39  |

**Table S6.** 147 PNaS protein sequences included in this study. Proteins are listed clockwise starting from Cluster 1 (see Fig. S6).

| <b>Abbreviation</b> | <b>Organism</b>                           | <b>GenBank Index#</b> | <b>Group</b>        | <b>Domain</b> | <b>Protein Size</b> |
|---------------------|-------------------------------------------|-----------------------|---------------------|---------------|---------------------|
| Cluster 1           |                                           |                       |                     |               |                     |
| Cph1                | <i>Chlorobium phaeobacteroides</i> BS1    | 189500659             | Chlorobi            | Bacteria      | 389                 |
| Pae1                | <i>Prosthecochloris aestuarii</i> DSM 271 | 194334412             | Chlorobi            | Bacteria      | 390                 |
| Pst1                | <i>Pseudomonas stutzeri</i> A1501         | 146281974             | Gammaproteobacteria | Bacteria      | 386                 |
| Psp1                | <i>Photobacterium sp.</i> SKA34           | 89072547              | Gammaproteobacteria | Bacteria      | 380                 |
| Ama1                | <i>Alteromonas macleodii</i> ATCC 27126   | 239993177             | Gammaproteobacteria | Bacteria      | 384                 |
| Orf1                | <i>gamma proteobacterium</i> HTCC5015     | 254449112             | Gammaproteobacteria | Bacteria      | 385                 |
| Bma1                | <i>Bermanella marisrubri</i>              | 94499226              | Gammaproteobacteria | Bacteria      | 405                 |
| Ptu1                | <i>Pseudoalteromonas tunicata</i> D2      | 88859983              | Gammaproteobacteria | Bacteria      | 377                 |
| Ahy1                | <i>Aeromonas hydrophila</i> ATCC 7966     | 117620245             | Gammaproteobacteria | Bacteria      | 384                 |
| Msp1                | <i>Moritella sp.</i> PE36                 | 149909267             | Gammaproteobacteria | Bacteria      | 383                 |
| Asu1                | <i>Amycolicococcus subflavus</i> DQS3-9A1 | 333918251             | Actinobacteria      | Bacteria      | 449                 |
| Iva1                | <i>Isoptericola variabilis</i> 225        | 334336336             | Actinobacteria      | Bacteria      | 418                 |
| Cli1                | <i>Congregibacter litoralis</i> KT71      | 88704233              | Gammaproteobacteria | Bacteria      | 422                 |
| Cge1                | <i>Corynebacterium genitalium</i> ATCC    | 300780328             | Actinobacteria      | Bacteria      | 453                 |

|           |                               |           |                     |           |     |
|-----------|-------------------------------|-----------|---------------------|-----------|-----|
|           | 33030                         |           |                     |           |     |
|           | <i>Acaryochloris marina</i>   |           |                     |           |     |
| Ama3      | <i>MBIC11017</i>              | 158338405 | Cyanobacteria       | Bacteria  | 388 |
|           | <i>Rhodopirellula baltica</i> |           |                     |           |     |
| Rba1      | <i>SH 1</i>                   | 32476763  | Planctomycetes      | Bacteria  | 394 |
| Lma1      | <i>Lyngbya majuscula 3L</i>   | 332709434 | Cyanobacteria       | Bacteria  | 379 |
|           | <i>Cyanothece sp. PCC</i>     |           |                     |           |     |
| Csp1      | <i>8801</i>                   | 218246349 | Cyanobacteria       | Bacteria  | 388 |
|           | <i>Crocospaera watsonii</i>   |           |                     |           |     |
| Cwa1      | <i>WH 8501</i>                | 67921248  | Cyanobacteria       | Bacteria  | 382 |
|           | <i>Arthrospira maxima</i>     |           |                     |           |     |
| Ama2      | <i>CS-328</i>                 | 209528298 | Cyanobacteria       | Bacteria  | 362 |
|           | <i>Pseudovibrio sp.</i>       |           |                     |           |     |
| Psp2      | <i>JE062</i>                  | 254473624 | Alphaproteobacteria | Bacteria  | 394 |
|           | Average protein size (aas)    |           |                     |           | 395 |
|           | SD                            |           |                     |           | 23  |
| Cluster 2 |                               |           |                     |           |     |
|           | <i>Thalassiosira</i>          |           |                     |           |     |
|           | <i>pseudonana</i>             |           |                     |           |     |
| Tps1      | <i>CCMP1335</i>               | 224008354 | Bacillariophyta     | Eukaryota | 624 |
|           | <i>Thalassiosira</i>          |           |                     |           |     |
|           | <i>pseudonana</i>             |           |                     |           |     |
| Tps2      | <i>CCMP1335</i>               | 224008010 | Bacillariophyta     | Eukaryota | 605 |
|           | <i>Phaeodactylum</i>          |           |                     |           |     |
|           | <i>tricornutum CCAP</i>       |           |                     |           |     |
| Ptr1      | <i>1055/1</i>                 | 219129079 | Bacillariophyta     | Eukaryota | 571 |
|           | <i>Alkalilimnicola</i>        |           |                     |           |     |
| Aeh1      | <i>ehrlichii MLHE-1</i>       | 114320892 | Gammaproteobacteria | Bacteria  | 413 |
|           | <i>uncultured gamma</i>       |           |                     |           |     |
| Orf4      | <i>proteobacterium</i>        | 297172079 | Gammaproteobacteria | Bacteria  | 413 |



|                            |                                                                  |           |                |          |     |
|----------------------------|------------------------------------------------------------------|-----------|----------------|----------|-----|
| Asp1                       | <i>HF0770_07M15</i><br><i>Algoriphagus sp. PR1</i>               | 311745175 | Bacteroidetes  | Bacteria | 368 |
| Mtr1                       | <i>Marivirga tractuosa</i><br><i>DSM 4126</i>                    | 313675848 | Bacteroidetes  | Bacteria | 369 |
| Mma1                       | <i>Microscilla marina</i><br><i>ATCC 23134</i>                   | 124006152 | Bacteroidetes  | Bacteria | 387 |
| Average protein size (aas) |                                                                  |           |                |          | 469 |
| SD                         |                                                                  |           |                |          | 111 |
| Cluster 3                  |                                                                  |           |                |          |     |
| Cef1                       | <i>Corynebacterium</i><br><i>efficiens YS-314</i>                | 259505867 | Actinobacteria | Bacteria | 452 |
| Cgl1                       | <i>Corynebacterium</i><br><i>glutamicum ATCC</i><br><i>13032</i> | 62391580  | Actinobacteria | Bacteria | 436 |
| Average protein size (aas) |                                                                  |           |                |          | 444 |
| SD                         |                                                                  |           |                |          | 11  |
| Cluster 4                  |                                                                  |           |                |          |     |
| Smo1                       | <i>Solobacterium moorei</i><br><i>F0204</i>                      | 320527361 | Firmicutes     | Bacteria | 562 |
| Ala1                       | <i>Anaerococcus</i><br><i>lactolyticus ATCC</i><br><i>51172</i>  | 227485742 | Firmicutes     | Bacteria | 563 |
| Average protein size (aas) |                                                                  |           |                |          | 563 |
| SD                         |                                                                  |           |                |          | 1   |
| Cluster 5                  |                                                                  |           |                |          |     |
| Ban1                       | <i>Bacillus anthracis str.</i><br><i>Ames</i>                    | 30260929  | Firmicutes     | Bacteria | 551 |
| Bha2                       | <i>Bacillus halodurans C-</i>                                    | 15613970  | Firmicutes     | Bacteria | 543 |

125

*Listeria*

*monocytogenes*

|                            |                                                    |           |               |          |     |
|----------------------------|----------------------------------------------------|-----------|---------------|----------|-----|
| Lmo1                       | <i>serotype 4b str. F2365</i>                      | 46907059  | Firmicutes    | Bacteria | 544 |
| Cth1                       | <i>Caldalkalibacillus<br/>thermarum TA2.A1</i>     | 335040185 | Firmicutes    | Bacteria | 537 |
| Seq1                       | <i>Streptococcus equi<br/>subsp. zooepidemicus</i> | 225869078 | Firmicutes    | Bacteria | 543 |
| Spn1                       | <i>Streptococcus<br/>pneumoniae TIGR4</i>          | 15900410  | Firmicutes    | Bacteria | 543 |
| Ppi1                       | <i>Pyramidobacter<br/>piscicola DSM 5455</i>       | 282855997 | Synergistetes | Bacteria | 547 |
| Apa1                       | <i>Aminomonas<br/>paucivorans DSM<br/>12260</i>    | 312879543 | Synergistetes | Bacteria | 538 |
| Hor1                       | <i>Halothermothrix orenii<br/>H 168</i>            | 220932998 | Firmicutes    | Bacteria | 548 |
| Aar1                       | <i>Acetohalobium<br/>arabaticum DSM 5501</i>       | 302392317 | Firmicutes    | Bacteria | 550 |
| Asp2                       | <i>Acidaminococcus sp.<br/>D21</i>                 | 227498921 | Firmicutes    | Bacteria | 541 |
| Psp3                       | <i>Phascolarctobacterium<br/>sp. YIT 12067</i>     | 323142438 | Firmicutes    | Bacteria | 535 |
| Average protein size (aas) |                                                    |           |               |          | 543 |
| SD                         |                                                    |           |               |          | 5   |

Cluster 6

*Eubacterium*

*ventriosum ATCC*

|      |                    |           |            |          |     |
|------|--------------------|-----------|------------|----------|-----|
| Eve1 | <i>27560</i>       | 154483404 | Firmicutes | Bacteria | 582 |
| Ece1 | <i>Eubacterium</i> | 313905594 | Firmicutes | Bacteria | 580 |

|      |                                                 |           |            |          |     |
|------|-------------------------------------------------|-----------|------------|----------|-----|
|      | <i>cellulosolvens</i> 6                         |           |            |          |     |
| Bha1 | <i>Blautia hansenii</i> DSM<br>20583            | 260587255 | Firmicutes | Bacteria | 586 |
| Rob1 | <i>Ruminococcus obeum</i><br>ATCC 29174         | 153813305 | Firmicutes | Bacteria | 588 |
| Cca1 | <i>Coprococcus catus</i><br>GD/7                | 291521247 | Firmicutes | Bacteria | 596 |
| Orf2 | <i>butyrate-producing<br/>bacterium</i> SS3/4   | 291561247 | Firmicutes | Bacteria | 591 |
| Eel1 | <i>Eubacterium eligens</i><br>ATCC 27750        | 238917553 | Firmicutes | Bacteria | 596 |
| Esi1 | <i>Eubacterium siraeum</i><br>DSM 15702         | 167750333 | Firmicutes | Bacteria | 592 |
| Rin1 | <i>Roseburia<br/>inulinivorans</i> DSM<br>16841 | 225378731 | Firmicutes | Bacteria | 587 |
| Ere1 | <i>Eubacterium rectale</i><br>M104/1            | 291528607 | Firmicutes | Bacteria | 594 |
| Ade1 | <i>Abiotrophia defectiva</i><br>ATCC 49176      | 229825925 | Firmicutes | Bacteria | 636 |
| Rsp1 | <i>Ruminococcus sp.</i><br>18P13                | 291543460 | Firmicutes | Bacteria | 583 |
| Cph4 | <i>Clostridium<br/>phytofermentans</i> ISDg     | 160880956 | Firmicutes | Bacteria | 590 |
| Sva1 | <i>Subdoligranulum<br/>variabile</i> DSM 15176  | 282601503 | Firmicutes | Bacteria | 608 |
| Fpr1 | <i>Faecalibacterium<br/>prausnitzii</i> A2-165  | 257439800 | Firmicutes | Bacteria | 600 |
| Rin2 | <i>Roseburia<br/>inulinivorans</i> DSM<br>16841 | 225375925 | Firmicutes | Bacteria | 598 |

|                            |                                                   |           |               |          |     |
|----------------------------|---------------------------------------------------|-----------|---------------|----------|-----|
|                            | <i>Anaerotruncus colihominis</i> DSM 17241        | 167770850 | Firmicutes    | Bacteria | 592 |
| Aco1                       |                                                   |           |               |          |     |
| Ral1                       | <i>Ruminococcus albus</i> 8                       | 325679893 | Firmicutes    | Bacteria | 599 |
| Average protein size (aas) |                                                   |           |               |          | 594 |
| SD                         |                                                   |           |               |          | 13  |
| Cluster 7                  |                                                   |           |               |          |     |
|                            | <i>Clostridium symbiosum</i> WAL-14163            | 323483835 | Firmicutes    | Bacteria | 558 |
| Csy1                       |                                                   |           |               |          |     |
| Cha2                       | <i>Clostridium hathewayi</i> DSM 13479            | 266621572 | Firmicutes    | Bacteria | 555 |
| Orf6                       | <i>butyrate-producing bacterium</i> SS3/4         | 291563870 | Firmicutes    | Bacteria | 555 |
| Bpe1                       | <i>Bacteroides pectinophilus</i> ATCC 43243       | 218133720 | Bacteroidetes | Bacteria | 556 |
| Csy2                       | <i>Clostridium symbiosum</i> WAL-14163            | 323484206 | Firmicutes    | Bacteria | 552 |
| Csa1                       | <i>Clostridium saccharolyticum</i> WMI            | 302386531 | Firmicutes    | Bacteria | 551 |
| Osp1                       | <i>Oribacterium sp. oral taxon</i> 078 str. F0262 | 291459750 | Firmicutes    | Bacteria | 563 |
| Csp2                       | <i>Clostridium sp.</i> SS2/1                      | 167767883 | Firmicutes    | Bacteria | 559 |
| Csc2                       | <i>Clostridium scindens</i> ATCC 35704            | 167759895 | Firmicutes    | Bacteria | 546 |
| Cle2                       | <i>Clostridium lentocellum</i> DSM 5427           | 326791913 | Firmicutes    | Bacteria | 562 |
| Cst1                       | <i>Clostridium sticklandii</i>                    | 310657910 | Firmicutes    | Bacteria | 542 |

|      |                                                                                |           |               |          |     |
|------|--------------------------------------------------------------------------------|-----------|---------------|----------|-----|
|      | <i>DSM 519</i>                                                                 |           |               |          |     |
| Fal1 | <i>Filifactor alocis</i> ATCC<br>35896                                         | 291166322 | Firmicutes    | Bacteria | 538 |
| Cba1 | <i>Clostridium bartlettii</i><br>DSM 16795                                     | 164686723 | Firmicutes    | Bacteria | 542 |
| Chi1 | <i>Clostridium hiranonis</i><br>DSM 13275                                      | 210621729 | Firmicutes    | Bacteria | 535 |
| Pan1 | <i>Peptostreptococcus</i><br><i>anaerobius</i> 653-L                           | 289424100 | Firmicutes    | Bacteria | 540 |
| Aor2 | <i>Alkaliphilus</i><br><i>oremlandii</i> OhILAs                                | 158321134 | Firmicutes    | Bacteria | 541 |
| Mvo1 | <i>Methanococcus voltae</i><br>A3                                              | 297619354 | Euryarchaeota | Archaea  | 545 |
| Fma1 | <i>Fingoldia magna</i><br>ATCC 29328                                           | 169824491 | Firmicutes    | Bacteria | 532 |
| Cbo1 | <i>Clostridium botulinum</i><br><i>B str. Eklund 17B</i>                       | 187935756 | Firmicutes    | Bacteria | 533 |
| Cpe1 | <i>Clostridium</i><br><i>perfringens str. 13</i>                               | 18311350  | Firmicutes    | Bacteria | 537 |
| Cbo2 | <i>Clostridium botulinum</i><br><i>D str. 1873</i>                             | 253681532 | Firmicutes    | Bacteria | 538 |
| Cle1 | <i>Clostridium leptum</i><br>DSM 753                                           | 160932730 | Firmicutes    | Bacteria | 556 |
| Cph3 | <i>Clostridium</i><br><i>phytofermentans</i> ISDg<br><i>butyrate-producing</i> | 160880899 | Firmicutes    | Bacteria | 554 |
| Orf5 | <i>bacterium</i> SSC/2                                                         | 291559010 | Firmicutes    | Bacteria | 560 |
| Csp3 | <i>Clostridium sp. D5</i>                                                      | 325265388 | Firmicutes    | Bacteria | 550 |
| Lba1 | <i>Lachnospiraceae</i><br><i>bacterium</i> 4_1_37FAA                           | 325662187 | Firmicutes    | Bacteria | 542 |
| Cne1 | <i>Clostridium nexile</i>                                                      | 210609822 | Firmicutes    | Bacteria | 543 |

|            |                              |           |                 |          |     |
|------------|------------------------------|-----------|-----------------|----------|-----|
|            | <i>DSM 1787</i>              |           |                 |          |     |
|            | <i>Clostridium scindens</i>  |           |                 |          |     |
| Csc1       | <i>ATCC 35704</i>            | 167758777 | Firmicutes      | Bacteria | 540 |
|            | <i>Clostridium hathewayi</i> |           |                 |          |     |
| Cha1       | <i>DSM 13479</i>             | 266619978 | Firmicutes      | Bacteria | 554 |
|            | <i>Erysipelotrichaceae</i>   |           |                 |          |     |
| Eba1       | <i>bacterium 5_2_54FAA</i>   | 293402293 | Firmicutes      | Bacteria | 558 |
|            | Average protein size (aas)   |           |                 |          | 548 |
|            | SD                           |           |                 |          | 9   |
| Cluster 8  |                              |           |                 |          |     |
|            | <i>Eggerthella lenta DSM</i> |           |                 |          |     |
| Ele1       | <i>2243</i>                  | 257790704 | Actinobacteria  | Bacteria | 587 |
| Cluster 9  |                              |           |                 |          |     |
|            | <i>Dictyoglomus</i>          |           |                 |          |     |
| Dth1       | <i>thermophilum H-6-12</i>   | 206901685 | Dictyoglomi     | Bacteria | 548 |
| Cluster 10 |                              |           |                 |          |     |
|            | <i>Chlorobium</i>            |           |                 |          |     |
|            | <i>phaeovibrioides DSM</i>   |           |                 |          |     |
| Cph2       | <i>265</i>                   | 145219613 | Chlorobi        | Bacteria | 565 |
|            | <i>Chlorobium luteolum</i>   |           |                 |          |     |
| Clu1       | <i>DSM 273</i>               | 78187008  | Chlorobi        | Bacteria | 555 |
|            | <i>Pelodictyon</i>           |           |                 |          |     |
|            | <i>phaeoclathratiforme</i>   |           |                 |          |     |
| Pph1       | <i>BU-1</i>                  | 194336325 | Chlorobi        | Bacteria | 564 |
|            | <i>Chthoniobacter flavus</i> |           |                 |          |     |
| Cfl1       | <i>Ellin428</i>              | 196234084 | Verrucomicrobia | Bacteria | 570 |
|            | Average protein size (aas)   |           |                 |          | 564 |
|            | SD                           |           |                 |          | 6   |

|                            |                                      |           |               |           |     |
|----------------------------|--------------------------------------|-----------|---------------|-----------|-----|
| Cluster 11                 |                                      |           |               |           |     |
| Pue1                       | <i>Porphyromonas uenonis 60-3</i>    | 228470933 | Bacteroidetes | Bacteria  | 605 |
| Cluster 12                 |                                      |           |               |           |     |
| Odi1                       | <i>Oikopleura dioica</i>             | 313243884 | Metazoa       | Eukaryota | 603 |
| Cluster 13                 |                                      |           |               |           |     |
| Spu5                       | <i>Strongylocentrotus purpuratus</i> | 115663105 | Metazoa       | Eukaryota | 561 |
| Cluster 14                 |                                      |           |               |           |     |
| Pin1                       | <i>Phytophthora infestans T30-4</i>  | 301105659 | none          | Eukaryota | 516 |
| Pin3                       | <i>Phytophthora infestans T30-4</i>  | 301123313 | none          | Eukaryota | 513 |
| Odi2                       | <i>Oikopleura dioica</i>             | 313229525 | Metazoa       | Eukaryota | 654 |
| Odi3                       | <i>Oikopleura dioica</i>             | 313242423 | Metazoa       | Eukaryota | 652 |
| Odi8                       | <i>Oikopleura dioica</i>             | 313242874 | Metazoa       | Eukaryota | 654 |
| Average protein size (aas) |                                      |           |               |           | 596 |
| SD                         |                                      |           |               |           | 59  |
| Cluster 15                 |                                      |           |               |           |     |
| Cre1                       | <i>Caenorhabditis remanei</i>        | 308511717 | Metazoa       | Eukaryota | 631 |
| Cluster 16                 |                                      |           |               |           |     |
| Isc1                       | <i>Ixodes scapularis</i>             | 241752738 | Metazoa       | Eukaryota | 478 |
| Tsp2                       | <i>Trichinella spiralis</i>          | 316974125 | Metazoa       | Eukaryota | 676 |
| Average protein size (aas) |                                      |           |               |           | 577 |

|                            |                                                     |           |         |           |     |
|----------------------------|-----------------------------------------------------|-----------|---------|-----------|-----|
| SD                         |                                                     |           |         |           | 140 |
| Cluster 17                 |                                                     |           |         |           |     |
| Cin1                       | <i>Ciona intestinalis</i>                           | 198433216 | Metazoa | Eukaryota | 629 |
| Cin4                       | <i>Ciona intestinalis</i>                           | 198413159 | Metazoa | Eukaryota | 616 |
| Cin2                       | <i>Ciona intestinalis</i>                           | 198428774 | Metazoa | Eukaryota | 595 |
| Cin3                       | <i>Ciona intestinalis</i>                           | 198437634 | Metazoa | Eukaryota | 604 |
| Average protein size (aas) |                                                     |           |         |           | 611 |
| SD                         |                                                     |           |         |           | 15  |
| Cluster 18                 |                                                     |           |         |           |     |
| Sko2                       | <i>Saccoglossus kowalevskii</i>                     | 291244118 | Metazoa | Eukaryota | 895 |
| Sko3                       | <i>Saccoglossus kowalevskii</i>                     | 291244124 | Metazoa | Eukaryota | 706 |
| Average protein size (aas) |                                                     |           |         |           | 801 |
| SD                         |                                                     |           |         |           | 134 |
| Cluster 19                 |                                                     |           |         |           |     |
| Cja1                       | <i>Callithrix jacchus</i><br><i>Ornithorhynchus</i> | 296196772 | Metazoa | Eukaryota | 690 |
| Oan1                       | <i>anatinus</i>                                     | 149412321 | Metazoa | Eukaryota | 692 |
| Gga1                       | <i>Gallus gallus</i>                                | 46048932  | Metazoa | Eukaryota | 674 |
| Xla1                       | <i>Xenopus laevis</i>                               | 285403622 | Metazoa | Eukaryota | 674 |
| Dre3                       | <i>Danio rerio</i>                                  | 33504533  | Metazoa | Eukaryota | 642 |
| Dre4                       | <i>Danio rerio</i>                                  | 32822845  | Metazoa | Eukaryota | 682 |
| Dre2                       | <i>Danio rerio</i><br><i>Pseudopleuronectes</i>     | 66910279  | Metazoa | Eukaryota | 631 |
| Pam1                       | <i>americanus</i>                                   | 1089908   | Metazoa | Eukaryota | 637 |
| Ssa1                       | <i>Salmo salar</i>                                  | 213513808 | Metazoa | Eukaryota | 692 |
| Dre1                       | <i>Danio rerio</i>                                  | 292625673 | Metazoa | Eukaryota | 562 |



|      |                                      |           |         |           |     |
|------|--------------------------------------|-----------|---------|-----------|-----|
| Dre5 | <i>Danio rerio</i>                   | 326673248 | Metazoa | Eukaryota | 645 |
| Gga2 | <i>Gallus gallus</i>                 | 118097360 | Metazoa | Eukaryota | 675 |
| Dvi1 | <i>Didelphis virginiana</i>          | 425469    | Metazoa | Eukaryota | 653 |
| Mdo4 | <i>Monodelphis domestica</i>         | 126331894 | Metazoa | Eukaryota | 611 |
| Mdo5 | <i>Monodelphis domestica</i>         | 126331888 | Metazoa | Eukaryota | 628 |
| Mdo2 | <i>Monodelphis domestica</i>         | 334331779 | Metazoa | Eukaryota | 553 |
| Mdo3 | <i>Monodelphis domestica</i>         | 334331773 | Metazoa | Eukaryota | 652 |
| Mdo1 | <i>Monodelphis domestica</i>         | 334331775 | Metazoa | Eukaryota | 560 |
| Ame1 | <i>Ailuropoda melanoleuca</i>        | 301781530 | Metazoa | Eukaryota | 602 |
| Mmu2 | <i>Macaca mulatta</i>                | 109109654 | Metazoa | Eukaryota | 600 |
| Orf3 | <i>Xenopus (Silurana) tropicalis</i> | 301622941 | Metazoa | Eukaryota | 637 |
| Dpu1 | <i>Daphnia pulex</i>                 | 321463341 | Metazoa | Eukaryota | 613 |
| Dpu3 | <i>Daphnia pulex</i>                 | 321463340 | Metazoa | Eukaryota | 634 |
| Dpu2 | <i>Daphnia pulex</i>                 | 321469787 | Metazoa | Eukaryota | 575 |
| Dpu4 | <i>Daphnia pulex</i>                 | 321463339 | Metazoa | Eukaryota | 608 |
| Isc2 | <i>Ixodes scapularis</i>             | 242000082 | Metazoa | Eukaryota | 636 |
| Bfl1 | <i>Branchiostoma floridae</i>        | 260821227 | Metazoa | Eukaryota | 614 |
| Sko4 | <i>Saccoglossus kowalevskii</i>      | 291243895 | Metazoa | Eukaryota | 687 |
| Sko1 | <i>Saccoglossus kowalevskii</i>      | 291241855 | Metazoa | Eukaryota | 638 |
| Spu2 | <i>Strongylocentrotus purpuratus</i> | 115741862 | Metazoa | Eukaryota | 721 |

|                            |                             |           |         |           |     |
|----------------------------|-----------------------------|-----------|---------|-----------|-----|
|                            | <i>Strongylocentrotus</i>   |           |         |           |     |
| Spu1                       | <i>purpuratus</i>           | 72135890  | Metazoa | Eukaryota | 604 |
| Tad1                       | <i>Trichoplax adhaerens</i> | 195999576 | Metazoa | Eukaryota | 606 |
| Average protein size (aas) |                             |           |         |           | 635 |
| SD                         |                             |           |         |           | 42  |

**Table S7.** 74 PnuC protein sequences included in this study. Proteins are listed clockwise starting from Cluster 1 (see Fig. S7).

| <b>Abbreviation</b>        | <b>Organism</b>                                | <b>GenBank Index#</b> | <b>Group</b>          | <b>Domain</b> | <b>Protein Size</b> |
|----------------------------|------------------------------------------------|-----------------------|-----------------------|---------------|---------------------|
| Cluster 1                  |                                                |                       |                       |               |                     |
| Lre1                       | <i>Lactobacillus reuteri 100-23</i>            | 194467100             | Firmicutes            | Bacteria      | 241                 |
| Lfe1                       | <i>Lactobacillus fermentum IFO 3956</i>        | 184156132             | Firmicutes            | Bacteria      | 240                 |
| Lla2                       | <i>Lactococcus lactis subsp. cremoris SK11</i> | 116511656             | Firmicutes            | Bacteria      | 237                 |
| Average protein size (aas) |                                                |                       |                       |               | 239                 |
| SD                         |                                                |                       |                       |               | 2                   |
| Cluster 2                  |                                                |                       |                       |               |                     |
| Clal                       | <i>Campylobacter lari RM2100</i>               | 222823375             | Epsilonproteobacteria | Bacteria      | 219                 |
| Hpy1                       | <i>Helicobacter pylori 26695</i>               | 15645903              | Epsilonproteobacteria | Bacteria      | 220                 |
| Sde2                       | <i>Sulfurospirillum delevignum DSM 6946</i>    | 268679606             | Epsilonproteobacteria | Bacteria      | 200                 |
| Eha1                       | <i>Eubacterium hallii DSM 3353</i>             | 225025810             | Firmicutes            | Bacteria      | 227                 |
| Seq1                       | <i>Streptococcus equi subsp. zooepidemicus</i> | 225868279             | Firmicutes            | Bacteria      | 234                 |
| Lla3                       | <i>Lactococcus lactis subsp. cremoris SK11</i> | 116511706             | Firmicutes            | Bacteria      | 241                 |
| Average protein size (aas) |                                                |                       |                       |               | 223                 |

|                            |                                                |           |            |          |     |
|----------------------------|------------------------------------------------|-----------|------------|----------|-----|
| SD                         |                                                |           |            |          | 14  |
| Cluster 3                  |                                                |           |            |          |     |
| Lci1                       | <i>Leuconostoc citreum</i> KM20                | 170017105 | Firmicutes | Bacteria | 264 |
| Lar1                       | <i>Leuconostoc argentinum</i> KCTC 3773        | 326693493 | Firmicutes | Bacteria | 263 |
| Lpl1                       | <i>Lactobacillus plantarum</i> WCFS1           | 28377442  | Firmicutes | Bacteria | 273 |
| Wci2                       | <i>Weissella cibaria</i> KACC 11862            | 332637196 | Firmicutes | Bacteria | 259 |
| Lla1                       | <i>Lactococcus lactis</i> <i>Lactobacillus</i> | 146322280 | Firmicutes | Bacteria | 249 |
| Lph1                       | <i>phage LP65</i> <i>Weissella cibaria</i>     | 56693131  | Myoviridae | Viruses  | 256 |
| Wci1                       | <i>KACC 11862</i>                              | 332638280 | Firmicutes | Bacteria | 244 |
| Average protein size (aas) |                                                |           |            |          | 258 |
| SD                         |                                                |           |            |          | 10  |
| Cluster 4                  |                                                |           |            |          |     |
| Spn1                       | <i>Streptococcus pneumoniae</i> TIGR4          | 15901687  | Firmicutes | Bacteria | 269 |
| Smi1                       | <i>Streptococcus mitis</i> NCTC 12261          | 307707857 | Firmicutes | Bacteria | 259 |
| Ssu1                       | <i>Streptococcus suis</i> 05ZYH33              | 146319626 | Firmicutes | Bacteria | 273 |
| Smu1                       | <i>Streptococcus mutans</i> UA159              | 24379389  | Firmicutes | Bacteria | 259 |
| Cmo1                       | <i>Catonella morbi</i> ATCC 51271              | 229823079 | Firmicutes | Bacteria | 278 |

|           |                                                              |           |              |          |     |
|-----------|--------------------------------------------------------------|-----------|--------------|----------|-----|
|           | <i>Macrococcus caseolyticus</i>                              |           |              |          |     |
| Mca1      | JCSC5402                                                     | 222151695 | Firmicutes   | Bacteria | 245 |
|           | Average protein size (aas)                                   |           |              |          | 264 |
|           | SD                                                           |           |              |          | 12  |
| Cluster 5 |                                                              |           |              |          |     |
| Efa1      | <i>Enterococcus faecalis</i> V583                            | 29375333  | Firmicutes   | Bacteria | 226 |
| Cluster 6 |                                                              |           |              |          |     |
|           | <i>Leuconostoc mesenteroides</i> subsp. <i>mesenteroides</i> |           |              |          |     |
| Lme1      | ATCC 8293                                                    | 116618612 | Firmicutes   | Bacteria | 255 |
| Cluster 7 |                                                              |           |              |          |     |
|           | <i>Clostridium thermocellum</i>                              |           |              |          |     |
| Cth1      | ATCC 27405                                                   | 125975259 | Firmicutes   | Bacteria | 234 |
|           | <i>Clostridium bolteae</i> ATCC BAA-613                      |           |              |          |     |
| Cbo1      |                                                              | 160937996 | Firmicutes   | Bacteria | 231 |
|           | <i>Butyrivibrio proteoclasticus</i>                          |           |              |          |     |
| Bpr1      | B316                                                         | 302669157 | Firmicutes   | Bacteria | 236 |
|           | <i>Coprococcus eutactus</i> ATCC 27759                       |           |              |          |     |
| Ceu1      |                                                              | 163814331 | Firmicutes   | Bacteria | 244 |
| Bmu1      | <i>Brachyspira</i>                                           | 296126138 | Spirochaetes | Bacteria | 230 |

|                            |                                                                                          |           |              |          |     |
|----------------------------|------------------------------------------------------------------------------------------|-----------|--------------|----------|-----|
|                            | <i>murdochii</i> DSM<br>12563<br><i>Clostridium</i><br><i>asparagiforme</i><br>DSM 15981 | 225405522 | Firmicutes   | Bacteria | 235 |
| Cas1                       |                                                                                          |           |              |          | 235 |
| Average protein size (aas) |                                                                                          |           |              |          | 5   |
| SD                         |                                                                                          |           |              |          |     |
| Cluster 8                  |                                                                                          |           |              |          |     |
|                            | <i>Clostridium</i><br><i>scindens</i> ATCC<br>35704                                      | 167758545 | Firmicutes   | Bacteria | 230 |
| Csc1                       |                                                                                          |           |              |          |     |
|                            | <i>Turicibacter</i><br><i>sanguinis</i> PC909                                            | 293376974 | Firmicutes   | Bacteria | 229 |
| Tsa1                       |                                                                                          |           |              |          |     |
|                            | <i>Dorea</i><br><i>formicigenerans</i><br>ATCC 27755                                     | 166032332 | Firmicutes   | Bacteria | 227 |
| Dfo1                       |                                                                                          |           |              |          |     |
|                            | <i>Clostridium</i><br><i>bolteae</i> ATCC<br>BAA-613                                     | 160940289 | Firmicutes   | Bacteria | 228 |
| Cbo2                       |                                                                                          |           |              |          |     |
|                            | <i>Brevibacillus</i><br><i>brevis</i> NBRC<br>100599                                     | 226311114 | Firmicutes   | Bacteria | 237 |
| Bbr1                       |                                                                                          |           |              |          |     |
|                            | <i>Sebaldella</i><br><i>termitidis</i> ATCC<br>33386                                     | 269121730 | Fusobacteria | Bacteria | 230 |
| Ste1                       |                                                                                          |           |              |          |     |
|                            | <i>Haloplasma</i><br><i>contractile</i> SSD-<br>17B                                      | 334893023 | Tenericutes  | Bacteria | 252 |
| Hco1                       |                                                                                          |           |              |          |     |
|                            | <i>Bacillus</i> sp. NRRL<br>B-14911                                                      | 89099838  | Firmicutes   | Bacteria | 231 |
| Bsp1                       |                                                                                          |           |              |          |     |

Average protein size (aas) 233  
 SD 8

Cluster 9

|                            |                                                            |           |                     |          |     |
|----------------------------|------------------------------------------------------------|-----------|---------------------|----------|-----|
| Apl1                       | <i>Actinobacillus pleuropneumoniae serovar 1 str. 4074</i> | 53729065  | Gammaproteobacteria | Bacteria | 230 |
| Hin2                       | <i>Haemophilus influenzae 86-028NP</i>                     | 68249634  | Gammaproteobacteria | Bacteria | 226 |
| Pmu1                       | <i>Pasteurella multocida subsp. multocida str. Pm70</i>    | 15603703  | Gammaproteobacteria | Bacteria | 234 |
| Kde1                       | <i>Kingella denitrificans ATCC 33394</i>                   | 325266270 | Betaproteobacteria  | Bacteria | 229 |
| Gan1                       | <i>Gallibacterium anatis UMN179</i>                        | 332289165 | Gammaproteobacteria | Bacteria | 227 |
| Nmu1                       | <i>Neisseria mucosa ATCC 25996</i>                         | 288576217 | Betaproteobacteria  | Bacteria | 263 |
| Msu1                       | <i>Mannheimia succiniciproducens MBEL55E</i>               | 52424248  | Gammaproteobacteria | Bacteria | 241 |
| Average protein size (aas) |                                                            |           |                     |          | 236 |
| SD                         |                                                            |           |                     |          | 13  |

Cluster 10

|      |                                         |           |            |          |     |
|------|-----------------------------------------|-----------|------------|----------|-----|
| Cle1 | <i>Clostridium lentocellum DSM 5427</i> | 326792984 | Firmicutes | Bacteria | 228 |
|------|-----------------------------------------|-----------|------------|----------|-----|

|                            |                                                                     |           |                     |              |     |
|----------------------------|---------------------------------------------------------------------|-----------|---------------------|--------------|-----|
| Psp3                       | <i>Paenibacillus sp.</i><br><i>Y412MC10</i>                         | 261410044 | Firmicutes          | Bacteria     | 225 |
| Hhy1                       | <i>Haliscomenobacter</i><br><i>hydrossis DSM</i><br><i>1100</i>     | 332662236 | Bacteroidetes       | Bacteria     | 226 |
| Dal1                       | <i>Desulfatibacillum</i><br><i>alkenivorans AK-</i><br><i>01</i>    | 218781325 | Deltaproteobacteria | Bacteria     | 230 |
| Average protein size (aas) |                                                                     |           |                     |              | 227 |
| SD                         |                                                                     |           |                     |              | 2   |
| Cluster 11                 |                                                                     |           |                     |              |     |
| Orf1                       | <i>synthetic construct</i><br><i>Enterobacteria</i>                 | 62261752  | none                | Unclassified | 289 |
| Eph1                       | <i>phage EPS7</i>                                                   | 182682884 | Siphoviridae        | Viruses      | 225 |
| Average protein size (aas) |                                                                     |           |                     |              | 257 |
| SD                         |                                                                     |           |                     |              | 45  |
| Cluster 12                 |                                                                     |           |                     |              |     |
| Phe1                       | <i>Pedobacter</i><br><i>heparinus DSM</i><br><i>2366</i>            | 255530038 | Bacteroidetes       | Bacteria     | 204 |
| Mpa1                       | <i>Mucilaginibacter</i><br><i>paludis DSM</i><br><i>18603</i>       | 312889447 | Bacteroidetes       | Bacteria     | 210 |
| Psp1                       | <i>Pedobacter sp.</i><br><i>BAL39</i>                               | 149277331 | Bacteroidetes       | Bacteria     | 205 |
| Ssp2                       | <i>Sphingobacterium</i><br><i>spiritivorum ATCC</i><br><i>33300</i> | 227537640 | Bacteroidetes       | Bacteria     | 199 |
| Dfe1                       | <i>Dyadobacter</i>                                                  | 255037445 | Bacteroidetes       | Bacteria     | 209 |



|      |                                                                                                          |           |                     |          |     |
|------|----------------------------------------------------------------------------------------------------------|-----------|---------------------|----------|-----|
|      | <i>fermentans</i> DSM<br>18053                                                                           |           |                     |          |     |
|      | <i>Streptomyces</i><br><i>griseus</i> subsp.<br><i>griseus</i> NBRC<br>13350                             | 182439523 | Actinobacteria      | Bacteria | 226 |
| Sgr1 | <i>Rubrivivax</i>                                                                                        |           |                     |          |     |
| Rbe1 | <i>benzoatilyticus</i> JA2                                                                               | 332526687 | Betaproteobacteria  | Bacteria | 213 |
|      | <i>Hyphomonas</i><br><i>neptunium</i> ATCC<br>15444                                                      | 114798743 | Alphaproteobacteria | Bacteria | 218 |
| Hne1 | <i>Corynebacterium</i><br><i>matruchotii</i> ATCC<br>14266                                               | 305680194 | Actinobacteria      | Bacteria | 232 |
| Cma1 | <i>Herpetosiphon</i><br><i>aurantiacus</i> ATCC<br>23779                                                 | 159897043 | Chloroflexi         | Bacteria | 210 |
| Hau1 | <i>Serinicoccus</i><br><i>profundi</i>                                                                   | 379058816 | Actinobacteria      | Bacteria | 241 |
| Spr1 | <i>Vibrio vulnificus</i><br>YJ016                                                                        | 37675870  | Gammaproteobacteria | Bacteria | 250 |
| Vvu1 | <i>Vibrio</i> sp. Ex25                                                                                   | 254227586 | Gammaproteobacteria | Bacteria | 243 |
| Vsp1 | <i>Salmonella</i><br><i>enterica</i> subsp.<br><i>enterica</i> serovar<br><i>Typhimurium</i> str.<br>LT2 | 16764122  | Gammaproteobacteria | Bacteria | 239 |
| Sen1 | <i>Escherichia coli</i><br>O157:H7 str.<br>EDL933                                                        | 15800460  | Gammaproteobacteria | Bacteria | 239 |
| Eco1 | <i>Photorhabdus</i>                                                                                      | 37525421  | Gammaproteobacteria | Bacteria | 241 |
| Plu1 |                                                                                                          |           |                     |          |     |

|            |                                                                                                        |           |                     |          |     |
|------------|--------------------------------------------------------------------------------------------------------|-----------|---------------------|----------|-----|
|            | <i>luminescens</i> subsp.<br><i>laumondii</i> TTO1<br><i>Pseudoalteromonas</i><br><i>atlantica</i> T6c | 109897078 | Gammaproteobacteria | Bacteria | 212 |
| Pat1       |                                                                                                        |           |                     |          |     |
|            | <i>Acidobacterium</i> sp.<br>MP5ACTX9                                                                  | 322435112 | Acidobacteria       | Bacteria | 211 |
| Asp1       |                                                                                                        |           |                     |          |     |
|            | <i>Bacillus anthracis</i><br>str. A2012                                                                | 65317639  | Firmicutes          | Bacteria | 218 |
| Ban1       |                                                                                                        |           |                     |          |     |
|            | <i>Clostridium</i><br><i>perfringens</i> str. 13                                                       | 18309381  | Firmicutes          | Bacteria | 225 |
| Cpe1       |                                                                                                        |           |                     |          |     |
|            | Average protein size (aas)                                                                             |           |                     |          | 222 |
|            | SD                                                                                                     |           |                     |          | 15  |
| Cluster 13 |                                                                                                        |           |                     |          |     |
|            | <i>Francisella</i> cf.<br><i>novicida</i> Fx1                                                          | 332678310 | Gammaproteobacteria | Bacteria | 210 |
| Fcf1       |                                                                                                        |           |                     |          |     |
|            | <i>Sphingobacterium</i><br><i>spiritivorum</i> ATCC<br>33300                                           | 227539605 | Bacteroidetes       | Bacteria | 212 |
| Ssp1       |                                                                                                        |           |                     |          |     |
|            | <i>Aerococcus urinae</i><br>ACS-120-V-Col10a                                                           | 326803505 | Firmicutes          | Bacteria | 208 |
| Aur1       |                                                                                                        |           |                     |          |     |
|            | Average protein size (aas)                                                                             |           |                     |          | 210 |
|            | SD                                                                                                     |           |                     |          | 2   |
| Cluster 14 |                                                                                                        |           |                     |          |     |
|            | <i>Spiroplasma citri</i><br><i>Bulleidia extracta</i>                                                  | 110005352 | Tenericutes         | Bacteria | 302 |
| Sci1       |                                                                                                        |           |                     |          |     |
|            | W1219                                                                                                  | 283768398 | Firmicutes          | Bacteria | 403 |
| Bex1       |                                                                                                        |           |                     |          |     |
|            | Average protein size (aas)                                                                             |           |                     |          | 353 |
|            | SD                                                                                                     |           |                     |          | 71  |

**Table S8A.** 41 of the 97 GPCR protein sequences included in this study and used for the phylogenetic tree shown in Fig. S8B. Proteins are listed clockwise starting from Cluster 1. Proteins represented by Dre4 of cluster 10 are presented in Table S8B.

| Abbreviation                | Organism                       | GenBank Index# | Group   | Domain    | Protein Size | Functional Type                                             |
|-----------------------------|--------------------------------|----------------|---------|-----------|--------------|-------------------------------------------------------------|
| Cluster 1                   |                                |                |         |           |              |                                                             |
| CALCR                       | <i>Homo sapiens</i>            | 399180         | Metazoa | Eukaryota | 490          | Calcitonin Receptor                                         |
| PDFR                        | <i>Drosophila melanogaster</i> | 74949071       | Metazoa | Eukaryota | 669          | PDF Receptor                                                |
| CRFR1                       | <i>Homo sapiens</i>            | 461836         | Metazoa | Eukaryota | 444          | Corticotropin-releasing factor receptor                     |
| DIHR                        | <i>Acheta domesticus</i>       | 2495063        | Metazoa | Eukaryota | 441          | Diuretic hormone receptor                                   |
| GIPR                        | <i>Homo sapiens</i>            | 1346133        | Metazoa | Eukaryota | 466          | Gastric Inhibitory polypeptide receptor                     |
| GLP1R                       | <i>Homo sapiens</i>            | 311033387      | Metazoa | Eukaryota | 463          | Glucagon-like peptide receptor                              |
| GHRHR                       | <i>Homo sapiens</i>            | 3041685        | Metazoa | Eukaryota | 423          | Growth hormone-releasing hormone receptor                   |
| PACR                        | <i>Homo sapiens</i>            | 1171986        | Metazoa | Eukaryota | 468          | Pituitary adenylate cyclase-activating polypeptide receptor |
| VIPR1                       | <i>Homo sapiens</i>            | 418253         | Metazoa | Eukaryota | 457          | Basoactive intestinal polypeptide receptor                  |
| SCTR                        | <i>Homo sapiens</i>            | 2506489        | Metazoa | Eukaryota | 440          | Secretin receptor                                           |
| PTH1R                       | <i>Homo sapiens</i>            | 417555         | Metazoa | Eukaryota | 593          | Parathyroid hormone peptide receptor                        |
| Average protein size: (aas) |                                |                |         |           | 487          |                                                             |
| SD                          |                                |                |         |           | 75           |                                                             |
| Cluster 2                   |                                |                |         |           |              |                                                             |
| BAI2                        | <i>Homo sapiens</i>            | 229462818      | Metazoa | Eukaryota | 1585         | Brain-specific angiogenesis inhibitor                       |
| Average protein size: (aas) |                                |                |         |           | 1585         |                                                             |
| SD                          |                                |                |         |           | 0            |                                                             |
| Cluster 3                   |                                |                |         |           |              |                                                             |
| EMR1                        | <i>Homo sapiens</i>            | 290457673      | Metazoa | Eukaryota | 886          | EGF-like module-containing mucin-like hormone receptor-like |
| CD97                        | <i>Homo sapiens</i>            | 90110013       | Metazoa | Eukaryota | 835          | CD97 antigen                                                |
| ELTD1                       | <i>Homo sapiens</i>            | 212276505      | Metazoa | Eukaryota | 690          | EGF and latrophilin domain-containing protein               |
| CELR1                       | <i>Homo sapiens</i>            | 22095551       | Metazoa | Eukaryota | 3014         | Cadherin EGF LAG seven-pass G-type receptor                 |

|                             |                                 |           |         |           |      |                                         |
|-----------------------------|---------------------------------|-----------|---------|-----------|------|-----------------------------------------|
| Average protein size: (aas) |                                 |           |         |           | 1356 |                                         |
| SD                          |                                 |           |         |           | 1108 |                                         |
| Cluster 4                   |                                 |           |         |           |      |                                         |
| LT4R1                       | <i>Homo sapiens</i>             | 3041713   | Metazoa | Eukaryota | 352  | Leukotriene B4 receptor                 |
| Average protein size: (aas) |                                 |           |         |           | 352  |                                         |
| SD                          |                                 |           |         |           | 0    |                                         |
| Cluster 5                   |                                 |           |         |           |      |                                         |
| MTH10                       | <i>Drosophila melanogaster</i>  | 166215065 | Metazoa | Eukaryota | 585  | Methuselah-like receptor                |
| GABR2                       | <i>Homo sapiens</i>             | 12643641  | Metazoa | Eukaryota | 941  | Gamma-aminobutyric acid type B receptor |
| VN1R1                       | <i>Homo sapiens</i>             | 71153399  | Metazoa | Eukaryota | 353  | Vomeroneasal type-1 receptor            |
| GRM1                        | <i>Homo sapiens</i>             | 311033443 | Metazoa | Eukaryota | 1194 | Metabotropic glutamate receptor         |
| CASR                        | <i>Homo sapiens</i>             | 1168781   | Metazoa | Eukaryota | 1078 | Extracellular calcium-sensing receptor  |
| GPC6A                       | <i>Homo sapiens</i>             | 74745292  | Metazoa | Eukaryota | 926  | Odorant receptor                        |
| TS1R2                       | <i>Homo sapiens</i>             | 116242831 | Metazoa | Eukaryota | 839  | Taste receptor type 1                   |
| CAR1                        | <i>Dictyostelium discoideum</i> | 115617    | None    | Eukaryota | 392  | Cyclic AMP receptor                     |
| Average protein size: (aas) |                                 |           |         |           | 789  |                                         |
| SD                          |                                 |           |         |           | 312  |                                         |
| Cluster 6                   |                                 |           |         |           |      |                                         |
| GNRHR                       | <i>Homo sapiens</i>             | 399777    | Metazoa | Eukaryota | 328  | Gonadotropin-releasing hormone receptor |
| MTR1A                       | <i>Homo sapiens</i>             | 1346544   | Metazoa | Eukaryota | 350  | Melatonin receptor                      |
| Average protein size: (aas) |                                 |           |         |           | 339  |                                         |
| SD                          |                                 |           |         |           | 16   |                                         |
| Cluster 7                   |                                 |           |         |           |      |                                         |

|                             |                           |           |         |           |     |                                        |
|-----------------------------|---------------------------|-----------|---------|-----------|-----|----------------------------------------|
| ACM1                        | <i>Homo sapiens</i>       | 113118    | Metazoa | Eukaryota | 460 | Muscarinic acetylcholine receptor      |
| AA1R                        | <i>Homo sapiens</i>       | 231473    | Metazoa | Eukaryota | 326 | Adenosine receptor                     |
| Average protein size: (aas) |                           |           |         |           | 393 |                                        |
| SD                          |                           |           |         |           | 95  |                                        |
| Cluster 8                   |                           |           |         |           |     |                                        |
| TRFR                        | <i>Homo sapiens</i>       | 464921    | Metazoa | Eukaryota | 398 | Thyrotropin-releasing hormone receptor |
| Average protein size: (aas) |                           |           |         |           | 398 |                                        |
| SD                          |                           |           |         |           | 0   |                                        |
| Cluster 9                   |                           |           |         |           |     |                                        |
| AGTR1                       | <i>Homo sapiens</i>       | 231519    | Metazoa | Eukaryota | 359 | Angiotensin II receptor                |
| CLTR1                       | <i>Homo sapiens</i>       | 20138087  | Metazoa | Eukaryota | 337 | Cysteinyl leukotriene receptor         |
| PTAFR                       | <i>Homo sapiens</i>       | 129557    | Metazoa | Eukaryota | 342 | Platelet-activating factor receptor    |
| HCAR1                       | <i>Homo sapiens</i>       | 47117701  | Metazoa | Eukaryota | 346 | Hydroxycarboxylic acid receptor        |
| Average protein size: (aas) |                           |           |         |           | 346 |                                        |
| SD                          |                           |           |         |           | 9   |                                        |
| Cluster 10                  |                           |           |         |           |     |                                        |
| OPSD                        | <i>Homo sapiens</i>       | 129207    | Metazoa | Eukaryota | 348 | Rhodopsin                              |
| Cja1                        | <i>Callithrix jacchus</i> | 296228403 | Metazoa | Eukaryota | 354 | Opsin                                  |
| Average protein size: (aas) |                           |           |         |           | 351 |                                        |
| SD                          |                           |           |         |           | 4   |                                        |
| Cluster 11                  |                           |           |         |           |     |                                        |
| FSHR                        | <i>Homo sapiens</i>       | 311033420 | Metazoa | Eukaryota | 695 | Follicle-stimulating hormone receptor  |
| Average protein size: (aas) |                           |           |         |           | 695 |                                        |
| SD                          |                           |           |         |           | 0   |                                        |

Cluster 12

|                             |                     |           |         |           |     |                                  |
|-----------------------------|---------------------|-----------|---------|-----------|-----|----------------------------------|
| OR1E1                       | <i>Homo sapiens</i> | 400671    | Metazoa | Eukaryota | 314 | Olfactory receptor               |
| CNR1                        | <i>Homo sapiens</i> | 115562    | Metazoa | Eukaryota | 472 | Cannabinoid receptor             |
| S1PR1                       | <i>Homo sapiens</i> | 205371820 | Metazoa | Eukaryota | 382 | Sphingosine 1-phosphate receptor |
| Average protein size: (aas) |                     |           |         |           | 389 |                                  |
| SD                          |                     |           |         |           | 79  |                                  |

Cluster 13

|                             |                     |          |         |           |     |                           |
|-----------------------------|---------------------|----------|---------|-----------|-----|---------------------------|
| PE2R1                       | <i>Homo sapiens</i> | 83287886 | Metazoa | Eukaryota | 402 | Prostaglandin E2 receptor |
| Average protein size: (aas) |                     |          |         |           | 402 |                           |
| SD                          |                     |          |         |           | 0   |                           |

**Table S8B.** 56 of the 97 GPCR protein sequences included in this study for the phylogenetic tree shown in Fig. S8E. Proteins are listed clockwise starting from Cluster 1.

| Abbreviation                | Organism                             | GenBank Index# | Group   | Domain    | Protein Size |
|-----------------------------|--------------------------------------|----------------|---------|-----------|--------------|
| Cluster 1                   |                                      |                |         |           |              |
| Dre1                        | <i>Danio rerio</i>                   | 292621989      | Metazoa | Eukaryota | 354          |
| Dre4                        | <i>Danio rerio</i>                   | 113682063      | Metazoa | Eukaryota | 355          |
| Dre3                        | <i>Danio rerio</i>                   | 326679306      | Metazoa | Eukaryota | 362          |
| Orf1                        | <i>Xenopus (Silurana) tropicalis</i> | 301607740      | Metazoa | Eukaryota | 339          |
| Mmu1                        | <i>Mus musculus</i>                  | 148677107      | Metazoa | Eukaryota | 338          |
| Cja3                        | <i>Callithrix jacchus</i>            | 296225024      | Metazoa | Eukaryota | 333          |
| Mdo4                        | <i>Monodelphis domestica</i>         | 126341584      | Metazoa | Eukaryota | 352          |
| Oan3                        | <i>Ornithorhynchus anatinus</i>      | 149632071      | Metazoa | Eukaryota | 351          |
| Aca3                        | <i>Anolis carolinensis</i>           | 327282149      | Metazoa | Eukaryota | 357          |
| Gga5                        | <i>Gallus gallus</i>                 | 124249288      | Metazoa | Eukaryota | 377          |
| Average protein size: (aas) |                                      |                |         |           | 352          |
| SD                          |                                      |                |         |           | 13           |
| Cluster 2                   |                                      |                |         |           |              |
| Pol1                        | <i>Paralichthys olivaceus</i>        | 34740123       | Metazoa | Eukaryota | 360          |
| Omo1                        | <i>Osmerus mordax</i>                | 225706150      | Metazoa | Eukaryota | 356          |
| Ssa1                        | <i>Salmo salar</i>                   | 291190313      | Metazoa | Eukaryota | 371          |
| Dre5                        | <i>Danio rerio</i>                   | 292621989      | Metazoa | Eukaryota | 384          |
| Orf2                        | <i>Xenopus (Silurana) tropicalis</i> | 166157823      | Metazoa | Eukaryota | 345          |
| Average protein size: (aas) |                                      |                |         |           | 363          |
| SD                          |                                      |                |         |           | 15           |
| Cluster 3                   |                                      |                |         |           |              |
| Mmu2                        | <i>Macaca mulatta</i>                | 23305858       | Metazoa | Eukaryota | 355          |
| Ocu1                        | <i>Oryctolagus cuniculus</i>         | 283806620      | Metazoa | Eukaryota | 358          |
| Clu3                        | <i>Canis lupus familiaris</i>        | 52546730       | Metazoa | Eukaryota | 359          |

|                             |                                |           |            |           |     |
|-----------------------------|--------------------------------|-----------|------------|-----------|-----|
| Xla1                        | <i>Xenopus laevis</i>          | 148238158 | Metazoa    | Eukaryota | 352 |
| Cja4                        | <i>Callithrix jacchus</i>      | 9587726   | Metazoa    | Eukaryota | 347 |
| Ptr1                        | <i>Pan troglodytes</i>         | 332816585 | Metazoa    | Eukaryota | 436 |
| Average protein size: (aas) |                                |           |            |           | 368 |
| SD                          |                                |           |            |           | 34  |
| Cluster 4                   |                                |           |            |           |     |
| Dre2                        | <i>Danio rerio</i>             | 66911140  | Metazoa    | Eukaryota | 312 |
| Tni1                        | <i>Tetraodon nigroviridis</i>  | 47224097  | Metazoa    | Eukaryota | 309 |
| Dre6                        | <i>Danio rerio</i>             | 292629502 | Metazoa    | Eukaryota | 352 |
| Average protein size: (aas) |                                |           |            |           | 324 |
| SD                          |                                |           |            |           | 24  |
| Cluster 5                   |                                |           |            |           |     |
| Aca2                        | <i>Anolis carolinensis</i>     | 327282179 | Metazoa    | Eukaryota | 360 |
| Gga2                        | <i>Gallus gallus</i>           | 118086158 | Metazoa    | Eukaryota | 358 |
| Mdo5                        | <i>Monodelphis domestica</i>   | 126341642 | Metazoa    | Eukaryota | 354 |
| Average protein size: (aas) |                                |           |            |           | 357 |
| SD                          |                                |           |            |           | 3   |
| Cluster 6                   |                                |           |            |           |     |
| Cja1                        | <i>Callithrix jacchus</i>      | 296228403 | Metazoa    | Eukaryota | 354 |
| Mdo2                        | <i>Monodelphis domestica</i>   | 126341638 | Metazoa    | Eukaryota | 336 |
| Ymo1                        | <i>Yaba monkey tumor virus</i> | 38229175  | Poxviridae | Viruses   | 346 |
| Gga3                        | <i>Gallus gallus</i>           | 71896604  | Metazoa    | Eukaryota | 377 |
| Zal1                        | <i>Zonotrichia albicollis</i>  | 296399392 | Metazoa    | Eukaryota | 377 |
| Gga6                        | <i>Gallus gallus</i>           | 113951667 | Metazoa    | Eukaryota | 335 |
| Average protein size: (aas) |                                |           |            |           | 354 |
| SD                          |                                |           |            |           | 19  |



## Cluster 7

|                             |                                 |           |         |           |     |
|-----------------------------|---------------------------------|-----------|---------|-----------|-----|
| Cja2                        | <i>Callithrix jacchus</i>       | 296225031 | Metazoa | Eukaryota | 359 |
| Clu2                        | <i>Canis lupus familiaris</i>   | 57111007  | Metazoa | Eukaryota | 358 |
| Pab1                        | <i>Pongo abelii</i>             | 207080176 | Metazoa | Eukaryota | 352 |
| Lca1                        | <i>Lemur catta</i>              | 5713071   | Metazoa | Eukaryota | 339 |
| Oan4                        | <i>Ornithorhynchus anatinus</i> | 149632073 | Metazoa | Eukaryota | 348 |
| Oan5                        | <i>Ornithorhynchus anatinus</i> | 149632065 | Metazoa | Eukaryota | 420 |
| Aca1                        | <i>Anolis carolinensis</i>      | 327282177 | Metazoa | Eukaryota | 355 |
| Gga4                        | <i>Gallus gallus</i>            | 50732904  | Metazoa | Eukaryota | 354 |
| Average protein size: (aas) |                                 |           |         |           | 361 |
| SD                          |                                 |           |         |           | 25  |

## Cluster 8

|                             |                                 |           |         |           |     |
|-----------------------------|---------------------------------|-----------|---------|-----------|-----|
| Bta1                        | <i>Bos taurus</i>               | 296474745 | Metazoa | Eukaryota | 358 |
| Clu1                        | <i>Canis lupus familiaris</i>   | 57101676  | Metazoa | Eukaryota | 372 |
| Cja6                        | <i>Callithrix jacchus</i>       | 296225029 | Metazoa | Eukaryota | 373 |
| Mdo3                        | <i>Monodelphis domestica</i>    | 126341586 | Metazoa | Eukaryota | 354 |
| Oan2                        | <i>Ornithorhynchus anatinus</i> | 149632069 | Metazoa | Eukaryota | 378 |
| Oan6                        | <i>Ornithorhynchus anatinus</i> | 149632067 | Metazoa | Eukaryota | 344 |
| Mdo1                        | <i>Monodelphis domestica</i>    | 126341640 | Metazoa | Eukaryota | 363 |
| Cja5                        | <i>Callithrix jacchus</i>       | 297206879 | Metazoa | Eukaryota | 355 |
| Average protein size: (aas) |                                 |           |         |           | 362 |
| SD                          |                                 |           |         |           | 12  |

## Cluster 9

|                             |                            |           |         |           |     |
|-----------------------------|----------------------------|-----------|---------|-----------|-----|
| Aca4                        | <i>Anolis carolinensis</i> | 327282173 | Metazoa | Eukaryota | 344 |
| Xla2                        | <i>Xenopus laevis</i>      | 148223850 | Metazoa | Eukaryota | 353 |
| Average protein size: (aas) |                            |           |         |           | 349 |
| SD                          |                            |           |         |           | 6   |

Cluster 10

|                             |                            |           |               |         |     |
|-----------------------------|----------------------------|-----------|---------------|---------|-----|
| Ehe1                        | <i>Equid herpesvirus 2</i> | 124738401 | Herpesviridae | Viruses | 387 |
| Ehe2                        | <i>Equid herpesvirus 2</i> | 124738361 | Herpesviridae | Viruses | 383 |
| Average protein size: (aas) |                            |           |               |         | 385 |
| SD                          |                            |           |               |         | 3   |

Cluster 11

|                             |                                 |           |         |           |     |
|-----------------------------|---------------------------------|-----------|---------|-----------|-----|
| Gga1                        | <i>Gallus gallus</i>            | 154813804 | Metazoa | Eukaryota | 355 |
| Aca5                        | <i>Anolis carolinensis</i>      | 327282147 | Metazoa | Eukaryota | 355 |
| Oan1                        | <i>Ornithorhynchus anatinus</i> | 149455250 | Metazoa | Eukaryota | 361 |
| Average protein size: (aas) |                                 |           |         |           | 357 |
| SD                          |                                 |           |         |           | 3   |

**Table S9. The highest comparison scores between TOG superfamily (left column) and the MC and MIP families.** Proteins representative of families used in these comparisons are found in tables S1-S9.

|                   | 2.A.29<br>(MC) 2 TMSs | 2.A.29<br>(MC) 3 TMSs | 1.A.8<br>(MIP) 2 TMSs | 1.A.8<br>(MIP) 3 TMSs |
|-------------------|-----------------------|-----------------------|-----------------------|-----------------------|
| 9.A.14<br>(GPCR)  | 6.7 S.D.              | N/A                   | 5.6 S.D.              | 2.2 S.D.              |
| 2.A.43<br>(LCT)   | 8.4 S.D.              | N/A                   | 9.4 S.D.              | 8.8 S.D.              |
| 3.E.1<br>(MR)     | 8.7 S.D.              | N/A                   | 10.4 S.D.             | 8.6 S.D.              |
| 2.A.52<br>(NiCoT) | 9.5 S.D.              | 9.5 S.D.              | 8.9 S.D.              | 7.4 S.D.              |
| 2.A.82<br>(OST)   | 9.1 S.D.              | N/A                   | 8.2 S.D.              | 8.2 S.D.              |
| 4.B.1<br>(PnuC)   | 8.8 S.D.              | N/A                   | 7.8 S.D.              | 7.0 S.D.              |
| 2.A.102<br>(TSUP) | 9.4 S.D.              | 9.4 S.D.              | 10.2 S.D.             | 9.5 S.D.              |
| 2.A.58<br>(PNaS)  | 9.5 S.D.              | N/A                   | 10.5 S.D.             | 8.5 S.D.              |
| 9.A.58<br>(Sweet) | 5.9 S.D.              | N/A                   | 8.8 S.D.              | 8.8 S.D.              |
| Average           | 8.4 S.D.              | 9.5 S.D.              | 8.9 S.D.              | 7.7 S.D.              |

The highest comparison score between the MIP and MC families was 9.2 S.D. Cells shaded grey are comparison scores where the alignment contained 3 TMSs, while unshaded cells are comparison scores where the alignment contained 2 TMSs. N/A indicates that no alignment containing 3 TMSs aligned could be found.

**Table S10**

Table S10. The table presents HMM:HMM pairwise comparison scores indicating probabilities of homology as measured by HHsearch in the HHSuite (hhsuite-2.0.16). The similarity between Opsin (Alpha cluster of Rhodopsin GPCRs; GRAFS system of classification) and Microbial Rhodopsin (3.E.1) gave a score of 30%. In the footnote to the table, we show the consensus alignment between the HMM comparison between the Opsin cluster and the Microbial Rhodopsin family.

|                      | 2.A.102 | 2.A.82 | 3.E.1 | 9.A.58 | 2.A.52 | 2.A.58 | 4.B.1 | 2.A.43 | 1.A.69 |
|----------------------|---------|--------|-------|--------|--------|--------|-------|--------|--------|
| <b>Amine</b>         | 1%      | 0%     | 0%    | 0%     | 3%     | 0%     | 0%    | 1%     | 0%     |
| <b>MECA</b>          | 0%      | 0%     | 0%    | 0%     | 2%     | 0%     | 0%    | 1%     | 0%     |
| <b>Melatonin</b>     | 0%      | 6%     | 10%   | 0%     | 0%     | 1%     | 0%    | 1%     | 0%     |
| <b>Opsin</b>         | 0%      | 0%     | 31%   | 0%     | 0%     | 0%     | 0%    | 0%     | 0%     |
| <b>Prostaglandir</b> | 0%      | 0%     | 0%    | 0%     | 1%     | 0%     | 0%    | 1%     | 0%     |
| <b>beta</b>          | 0%      | 0%     | 0%    | 0%     | 0%     | 1%     | 0%    | 0%     | 0%     |
| <b>chemokine</b>     | 0%      | 0%     | 0%    | 0%     | 1%     | 0%     | 0%    | 0%     | 0%     |
| <b>MCH</b>           | 0%      | 1%     | 1%    | 1%     | 0%     | 0%     | 0%    | 1%     | 0%     |
| <b>SOG</b>           | 1%      | 0%     | 0%    | 2%     | 0%     | 0%     | 1%    | 0%     | 0%     |
| <b>glycoprotein</b>  | 0%      | 0%     | 1%    | 0%     | 0%     | 3%     | 0%    | 0%     | 0%     |
| <b>MAS</b>           | 0%      | 1%     | 2%    | 1%     | 0%     | 1%     | 0%    | 0%     | 0%     |
| <b>purin</b>         | 0%      | 1%     | 1%    | 1%     | 1%     | 1%     | 0%    | 1%     | 0%     |

```

Q Consensus 226 p~vrslf~tLr~l~vLWl~YPIVWlLGpeG~g~vIsv~etI~Y~ILD---LlAKv~FGfLlL~r~e~i~i~ 299 (753)
      .++++.....|-.|.+.|=|+++++---+|+ .+++..+|+---+ +.++++|.|-|=|.+.+. +..
T Consensus 300 Ek~vakm~mi~F~vcW~PY~va~g~P~ms~ipa~fAKS~tiyNPVIYv~mn~kFR~ilql~c~ 379 (507)

Q Consensus 300 ~~~~~g~e~ee~pet 329 (753)
      ---|....+---|.|.+.~+.+.+.+.+.
T Consensus 380 ~c~~~~~q~ 409 (507)

Q Consensus 171 i~LLvADI~MIVtGLiAALS~....~t~K~W~w..YtIGc-----iaflyVly~L~aa~tkp~---vrslf 233 (753)
      |..+==+|+|.+++++.+. .+.+ |. | -.+| .+.+++|.|...-|+-.+. =+ .+.+.
T Consensus 114 ivNlAvaDl~vs~t~s....ly~Vf..g~gC~Gf~slfGivSm~sLt~IA~dRYivI~kP~r~ 187 (507)

Q Consensus 234 ---tLr~l~vLWl~YPIVWlLGpe 256 (753)
      .+.+.+.+.|. |---|.+.|.
T Consensus 188 t~a~i~iWl~ysl~walPPf 211 (507)
  
```
